# Supplementary material for: Sarcanolides C–E: three new lindenane sesquiterpenoid dimers with anti-inflammatory activities from Sarcandra glabra
Source: Royal Society of Chemistry journal article supplement (doi:10.1039/d1ob02417e), 2022-01-01
Supplement: d1ob02417e1.pdf [file d1ob02417e1.pdf]

## **Sarcanolides C–E: Three new lindenane sesquiterpenoid dimers with anti-inflammatory activities from *Sarcandra glabra***

Long-Gao Xiao,<sup>‡a,b</sup> Ping Li,<sup>‡a</sup> Huan Yan,<sup>‡a</sup> Wei Ni,<sup>a</sup> Li He<sup>\*c</sup> and Hai-Yang Liu<sup>\*a</sup>

<sup>a</sup> State Key Laboratory of Phytochemistry and Plant Resources in West China, and Yunnan Key Laboratory of Natural Medicinal Chemistry, Kunming Institute of Botany, Chinese Academy of Sciences, Kunming 650201, China.

<sup>b</sup> University of Chinese Academy of Sciences, Beijing, 100049, China

<sup>c</sup> Department of Dermatology, The First Affiliated Hospital of Kunming Medical University, Kunming, 650032, China.

<sup>‡</sup> These authors contributed equally to this work.

\* Corresponding author.

E-mail address: drheli2662@126.com (L. He), haiyangliu@mail.kib.ac.cn (H.-Y. Liu)

## Table of Content

|                                                                                                                                                                                                                                                                                                                            |    |
|----------------------------------------------------------------------------------------------------------------------------------------------------------------------------------------------------------------------------------------------------------------------------------------------------------------------------|----|
| <b>Fig. S1</b> <sup>1</sup> H NMR spectrum (600 MHz) of compound <b>1</b> in CDCl <sub>3</sub> .....                                                                                                                                                                                                                       | 3  |
| <b>Fig. S2</b> <sup>13</sup> C NMR spectrum (150 MHz) of compound <b>1</b> in CDCl <sub>3</sub> .....                                                                                                                                                                                                                      | 4  |
| <b>Fig. S3</b> <sup>1</sup> H- <sup>1</sup> H COSY spectrum of compound <b>1</b> in CDCl <sub>3</sub> .....                                                                                                                                                                                                                | 5  |
| <b>Fig. S4</b> HSQC spectrum of compound <b>1</b> in CDCl <sub>3</sub> . ....                                                                                                                                                                                                                                              | 6  |
| <b>Fig. S5</b> HMBC spectrum of compound <b>1</b> in CDCl <sub>3</sub> . ....                                                                                                                                                                                                                                              | 7  |
| <b>Fig. S6</b> ROESY spectrum of compound <b>1</b> in CDCl <sub>3</sub> .....                                                                                                                                                                                                                                              | 8  |
| <b>Fig. S7</b> HRESI (+) MS spectrum of compound <b>1</b> .....                                                                                                                                                                                                                                                            | 9  |
| <b>Fig. S8</b> CD spectrum of compound <b>1</b> . ....                                                                                                                                                                                                                                                                     | 10 |
| <b>Fig. S9</b> IR spectrum of compound <b>1</b> .....                                                                                                                                                                                                                                                                      | 11 |
| <b>Fig. S10</b> <sup>1</sup> H NMR spectrum (500 MHz) of compound <b>2</b> in CDCl <sub>3</sub> .....                                                                                                                                                                                                                      | 12 |
| <b>Fig. S11</b> <sup>13</sup> C NMR spectrum (125 MHz) of compound <b>2</b> in CDCl <sub>3</sub> .....                                                                                                                                                                                                                     | 13 |
| <b>Fig. S12</b> <sup>1</sup> H- <sup>1</sup> H COSY spectrum of compound <b>2</b> in CDCl <sub>3</sub> .....                                                                                                                                                                                                               | 14 |
| <b>Fig. S13</b> HSQC spectrum of compound <b>2</b> in CDCl <sub>3</sub> . ....                                                                                                                                                                                                                                             | 15 |
| <b>Fig. S14</b> HMBC spectrum of compound <b>2</b> in CDCl <sub>3</sub> . ....                                                                                                                                                                                                                                             | 16 |
| <b>Fig. S15</b> ROESY spectrum of compound <b>2</b> in CDCl <sub>3</sub> .....                                                                                                                                                                                                                                             | 17 |
| <b>Fig. S16</b> HRESI (+) MS spectrum of compound <b>2</b> .....                                                                                                                                                                                                                                                           | 18 |
| <b>Fig. S17</b> CD spectrum of compound <b>2</b> . ....                                                                                                                                                                                                                                                                    | 19 |
| <b>Fig. S18</b> IR spectrum of compound <b>2</b> .....                                                                                                                                                                                                                                                                     | 20 |
| <b>Fig. S19</b> <sup>1</sup> H NMR spectrum (600 MHz) of compound <b>3</b> in CDCl <sub>3</sub> .....                                                                                                                                                                                                                      | 21 |
| <b>Fig. S20</b> <sup>13</sup> C NMR spectrum (150 MHz) of compound <b>3</b> in CDCl <sub>3</sub> .....                                                                                                                                                                                                                     | 22 |
| <b>Fig. S21</b> <sup>1</sup> H- <sup>1</sup> H COSY spectrum of compound <b>3</b> in CDCl <sub>3</sub> .....                                                                                                                                                                                                               | 23 |
| <b>Fig. S22</b> HSQC spectrum of compound <b>3</b> in CDCl <sub>3</sub> . ....                                                                                                                                                                                                                                             | 24 |
| <b>Fig. S23</b> HMBC spectrum of compound <b>3</b> in CDCl <sub>3</sub> . ....                                                                                                                                                                                                                                             | 25 |
| <b>Fig. S24</b> ROESY spectrum of compound <b>3</b> in CDCl <sub>3</sub> .....                                                                                                                                                                                                                                             | 26 |
| <b>Fig. S25</b> HRESI (+) MS spectrum of compound <b>3</b> .....                                                                                                                                                                                                                                                           | 27 |
| <b>Fig. S26</b> CD spectrum of compound <b>3</b> . ....                                                                                                                                                                                                                                                                    | 28 |
| <b>Fig. S27</b> IR spectrum of compound <b>3</b> .....                                                                                                                                                                                                                                                                     | 29 |
| <b>Table S1</b> Standard orientations of <b>1a</b> (1 <i>R</i> ,3 <i>S</i> ,4 <i>S</i> ,5 <i>S</i> ,9 <i>R</i> ,10 <i>R</i> ,11 <i>R</i> ,1' <i>R</i> ,3' <i>S</i> ,4' <i>S</i> ,5' <i>R</i> ,7' <i>R</i> ,8' <i>R</i> ,9' <i>S</i> ,10' <i>S</i> ,1''' <i>S</i> )- <b>1</b> at B3LYP/6-311+G(2d,p) level in methanol..... | 30 |
| <b>Table S2</b> Standard orientations of <b>2a</b> (1 <i>R</i> ,3 <i>S</i> ,4 <i>S</i> ,5 <i>S</i> ,9 <i>R</i> ,10 <i>R</i> ,11 <i>R</i> ,1' <i>R</i> ,3' <i>S</i> ,4' <i>S</i> ,5' <i>R</i> ,7' <i>R</i> ,8' <i>R</i> ,9' <i>S</i> ,10' <i>S</i> )- <b>2</b> at B3LYP/6-311+G(2d,p) level in methanol.....                | 36 |
| <b>Table S3</b> Standard orientations of <b>3a</b> (1 <i>R</i> ,3 <i>S</i> ,6 <i>R</i> ,9 <i>R</i> ,10 <i>S</i> ,1' <i>R</i> ,3' <i>S</i> ,4' <i>S</i> ,5' <i>R</i> ,8' <i>S</i> ,9' <i>S</i> ,10' <i>S</i> )- <b>3</b> at B3LYP/6-311+G(2d,p) level in methanol. ....                                                     | 47 |

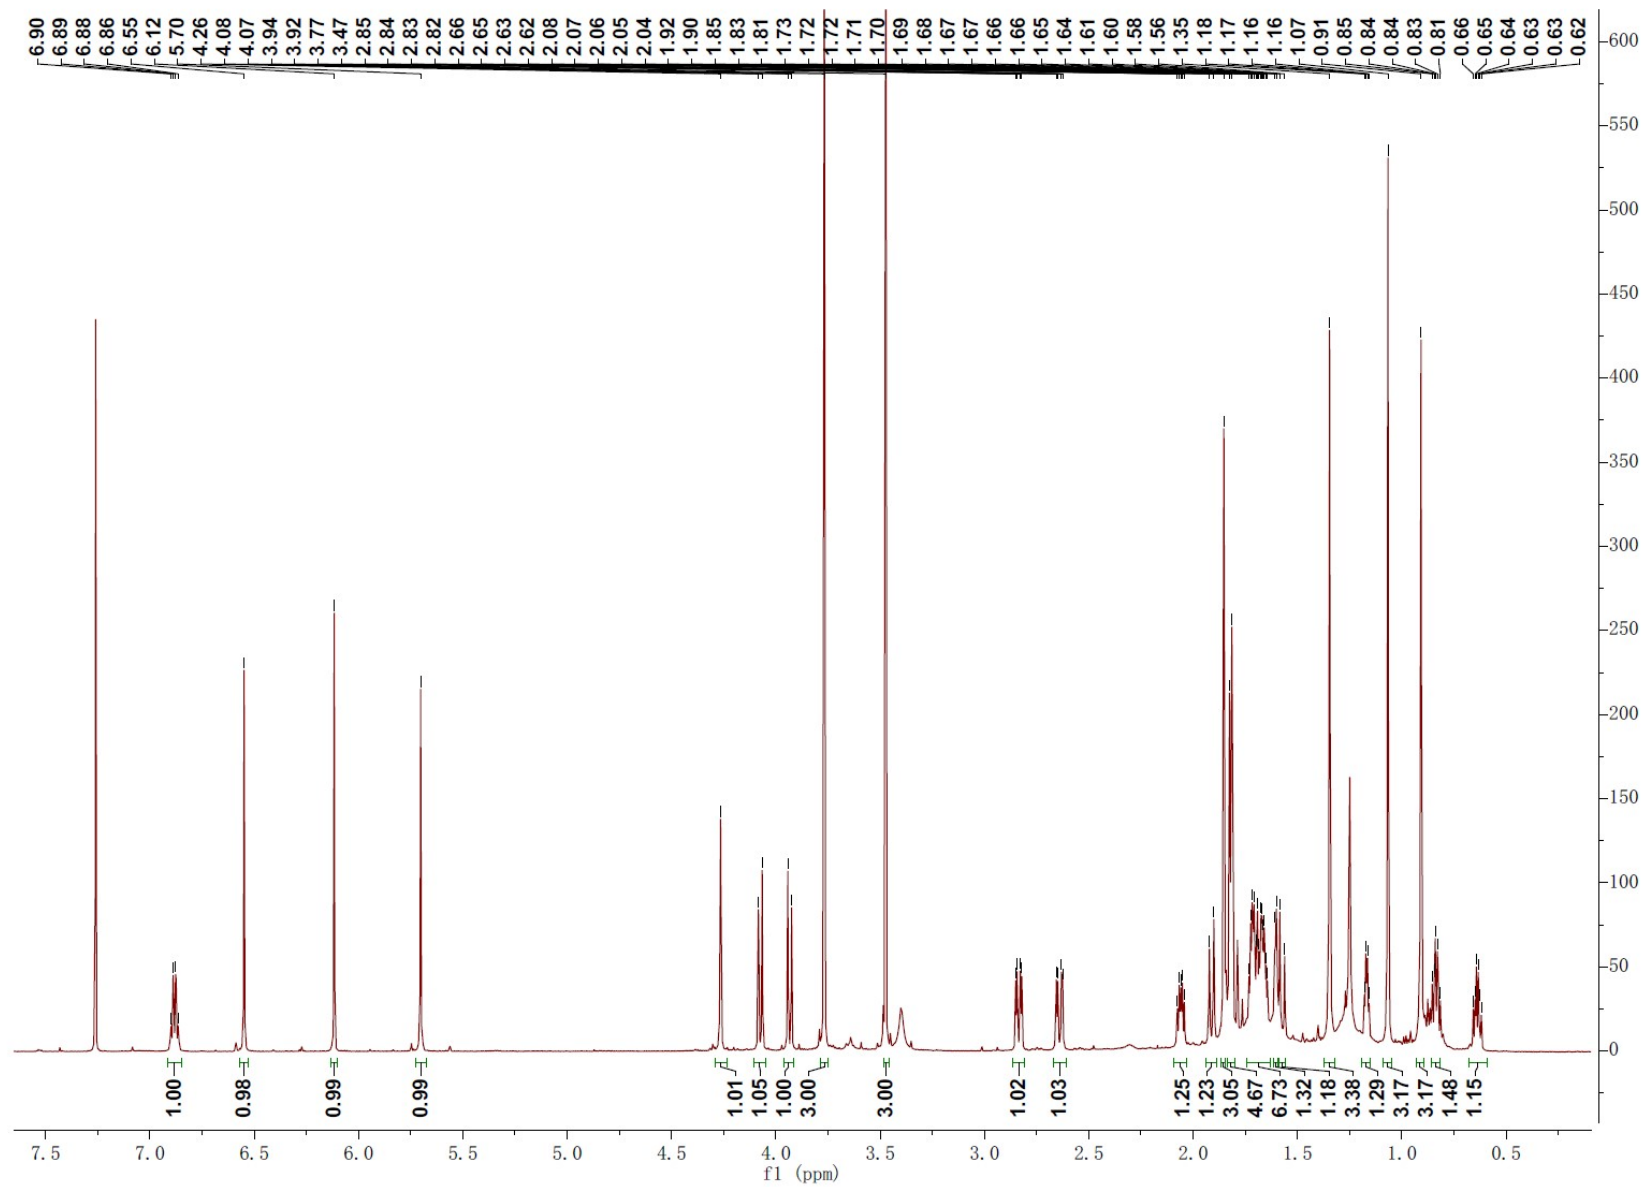

Fig. S1  $^1\text{H}$  NMR spectrum (600 MHz) of compound **1** in  $\text{CDCl}_3$ .

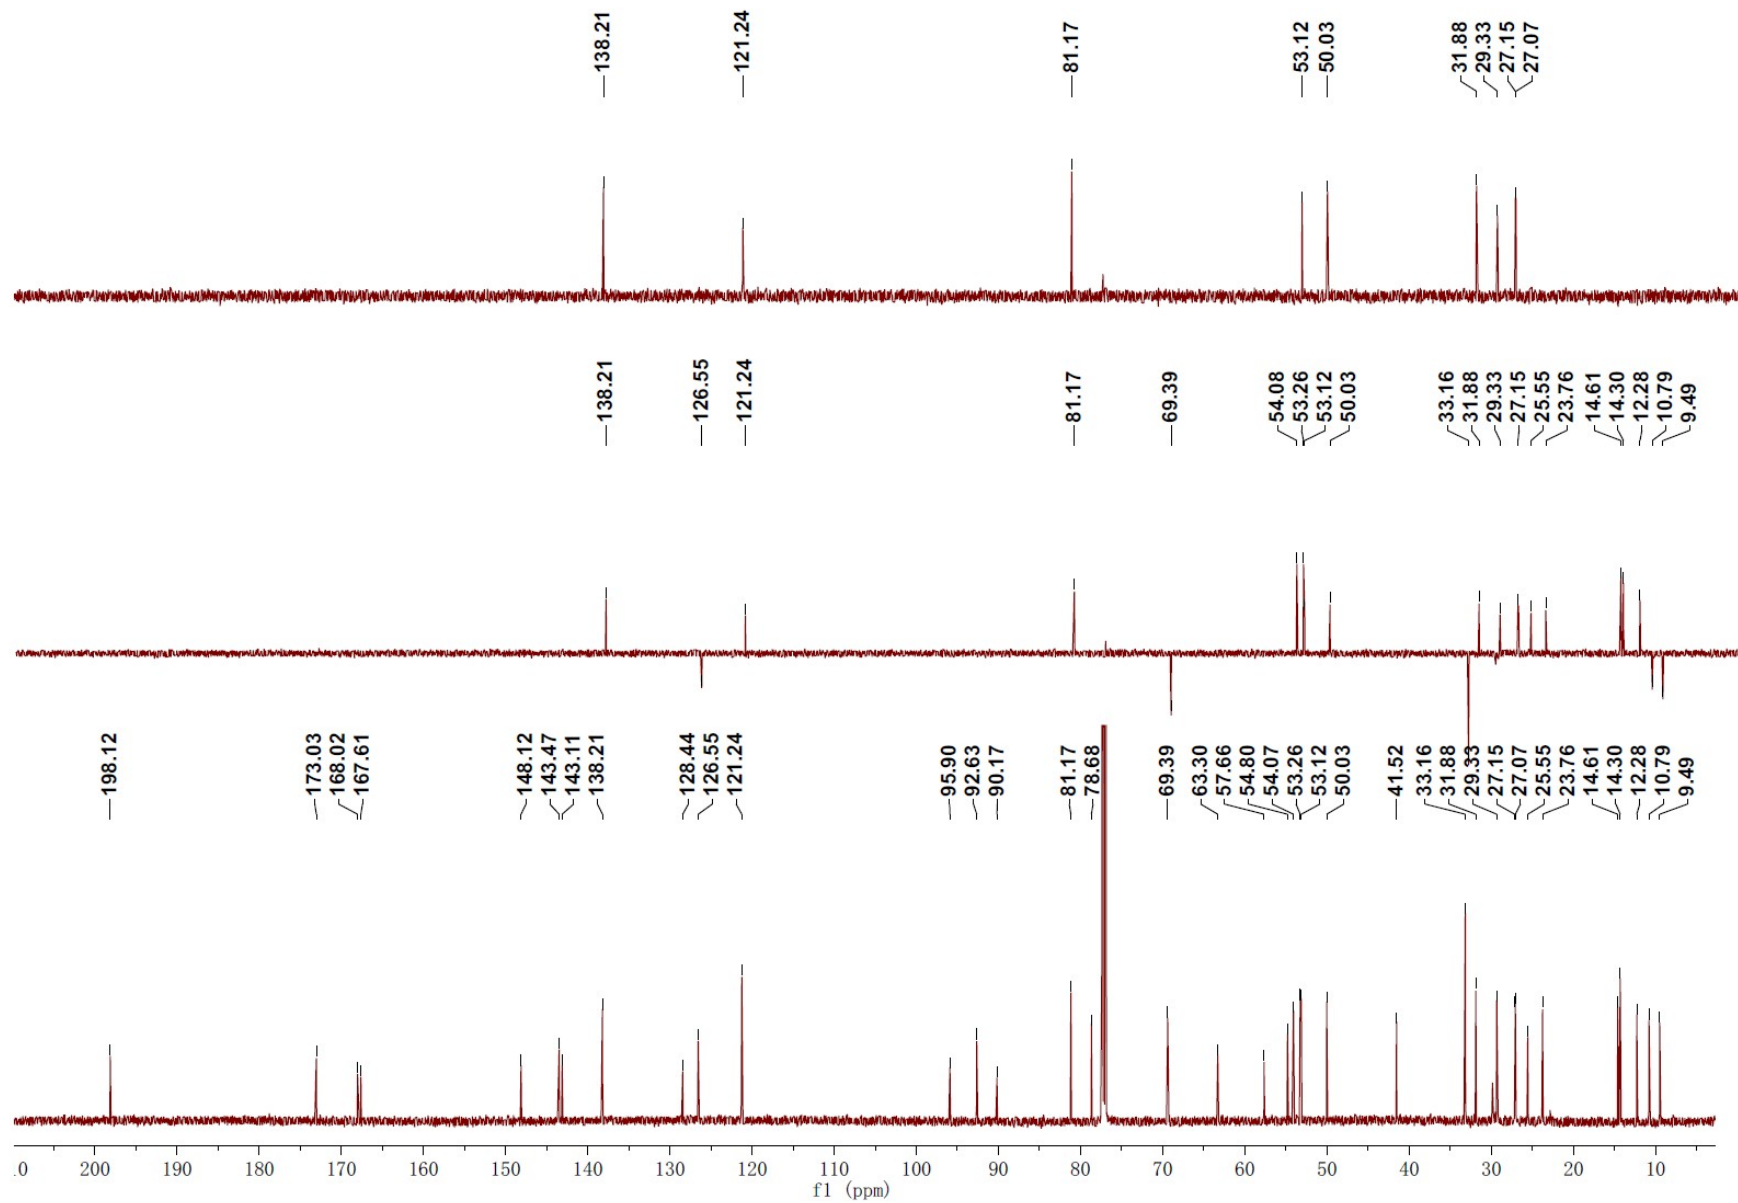

Fig. S2  $^{13}\text{C}$  NMR spectrum (150 MHz) of compound **1** in  $\text{CDCl}_3$ .

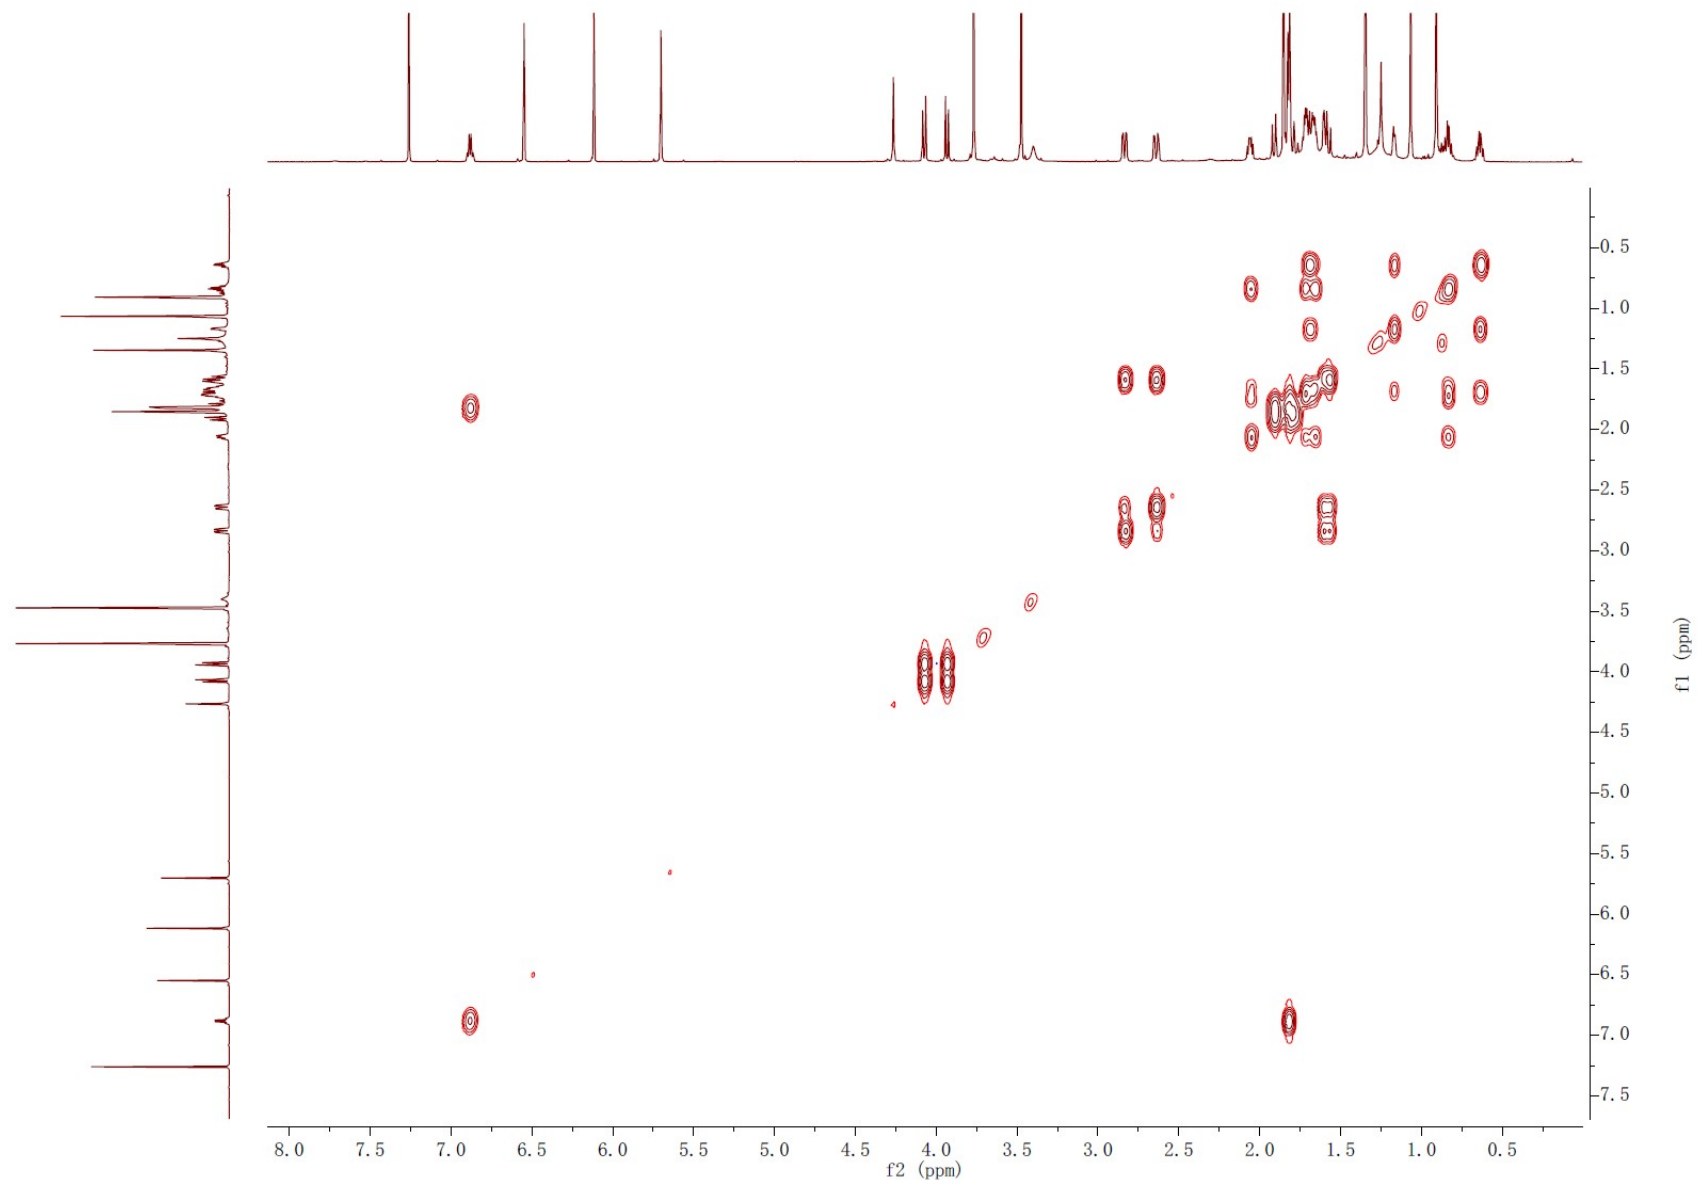

**Fig. S3**  $^1\text{H}$ - $^1\text{H}$  COSY spectrum of compound **1** in  $\text{CDCl}_3$ .

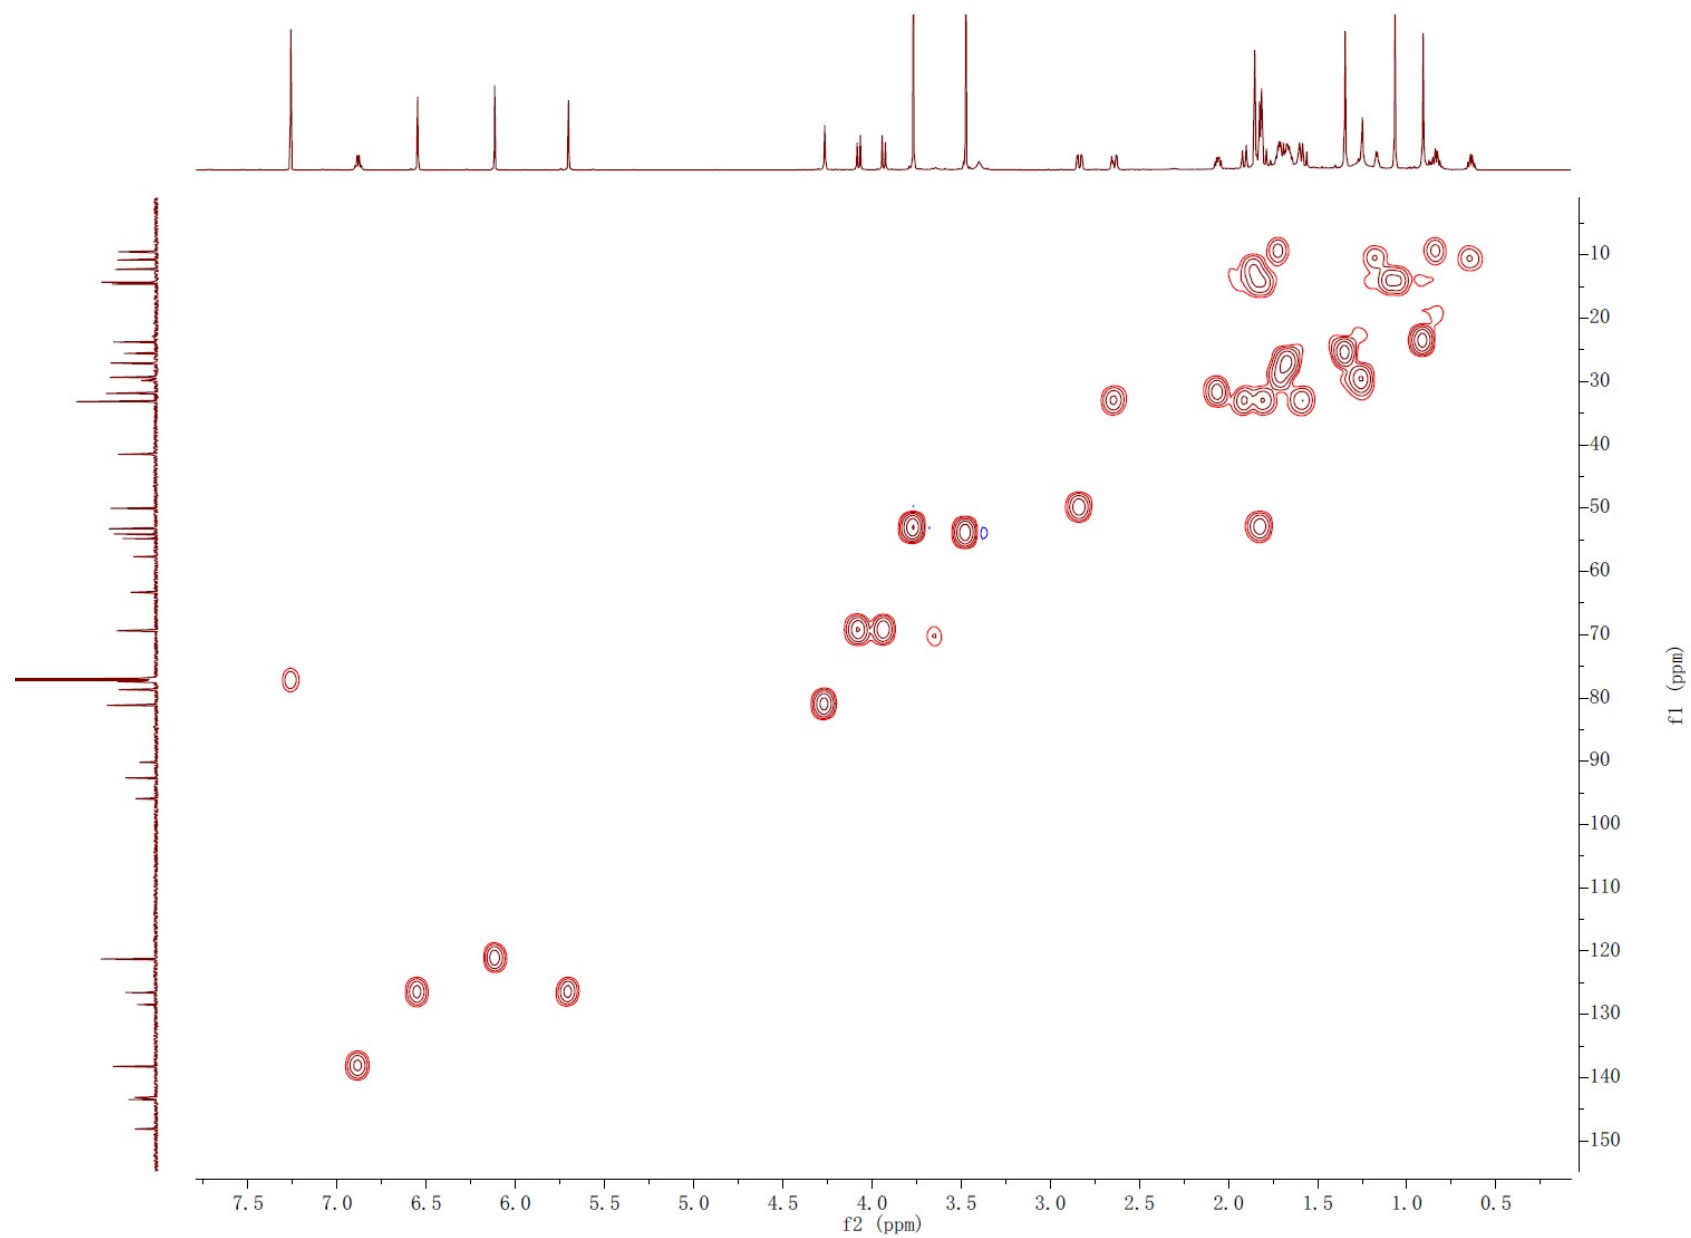

**Fig. S4** HSQC spectrum of compound **1** in CDCl<sub>3</sub>.

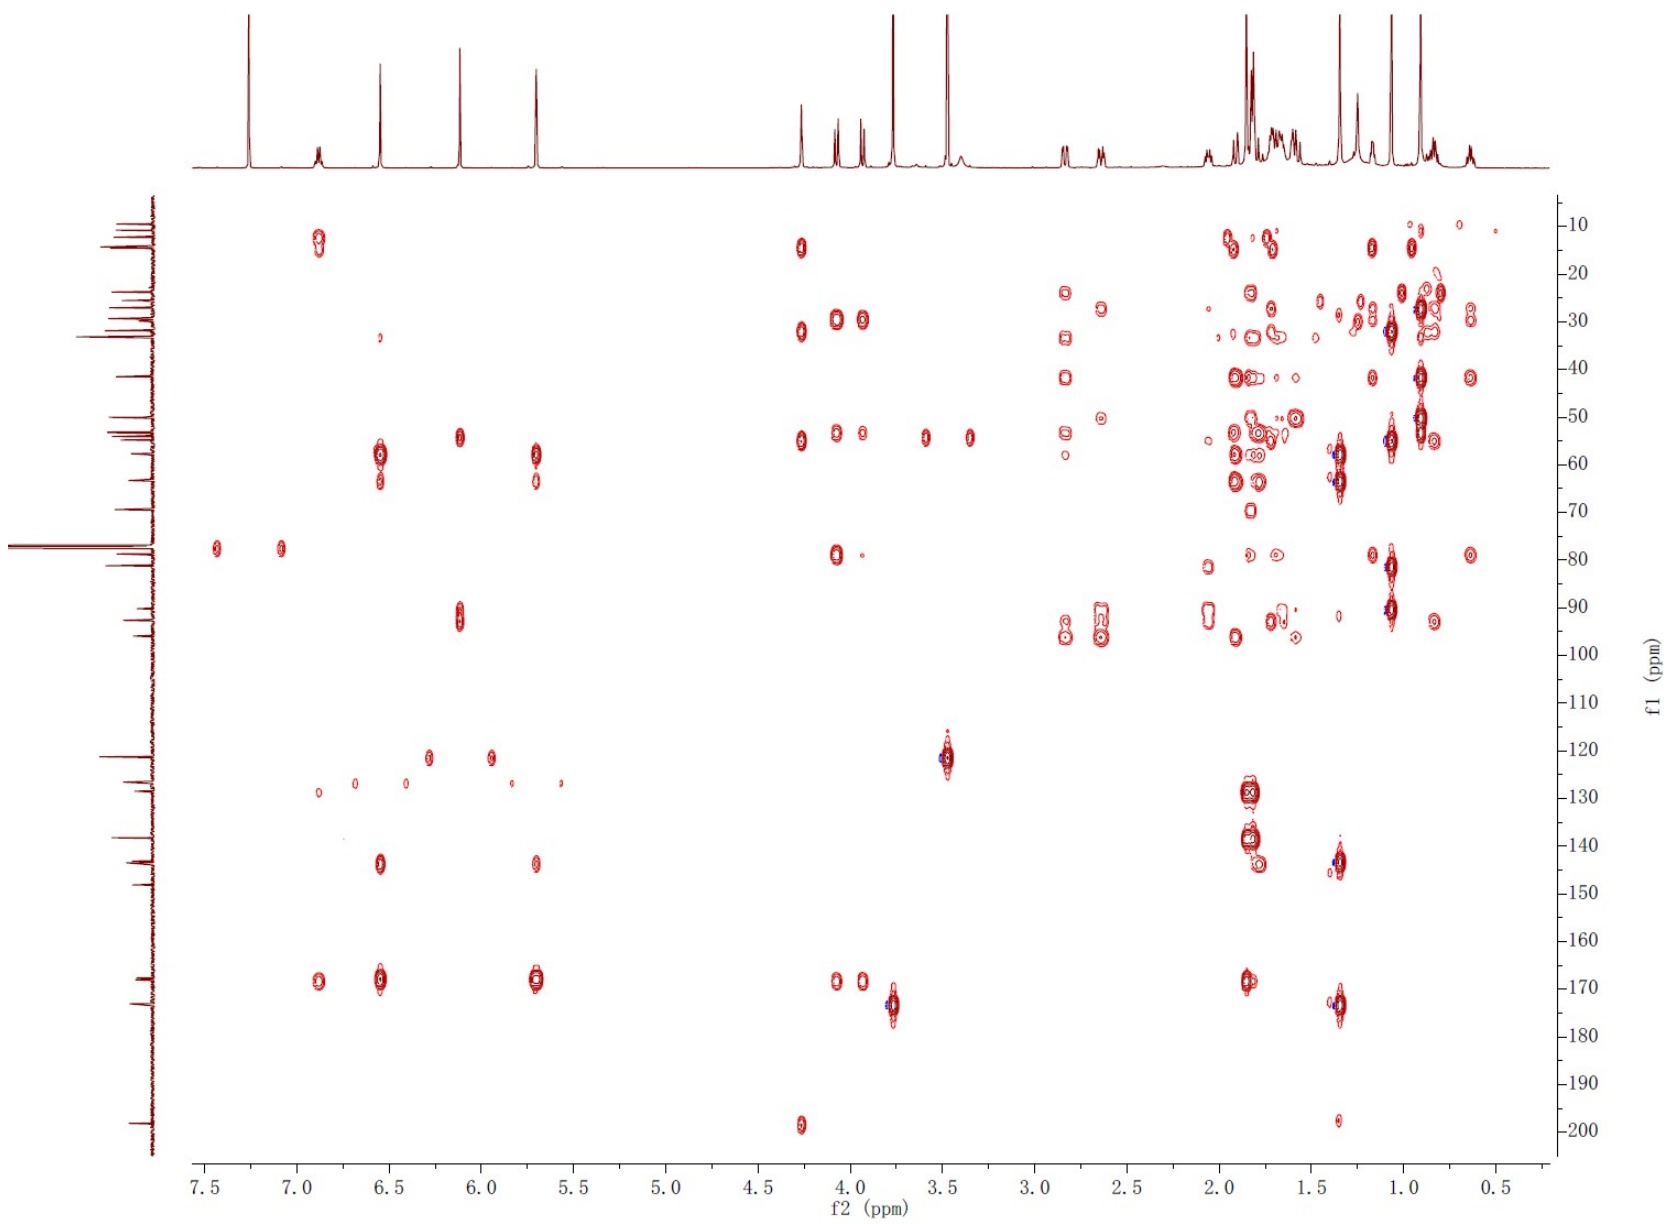

**Fig. S5** HMBC spectrum of compound **1** in CDCl<sub>3</sub>.

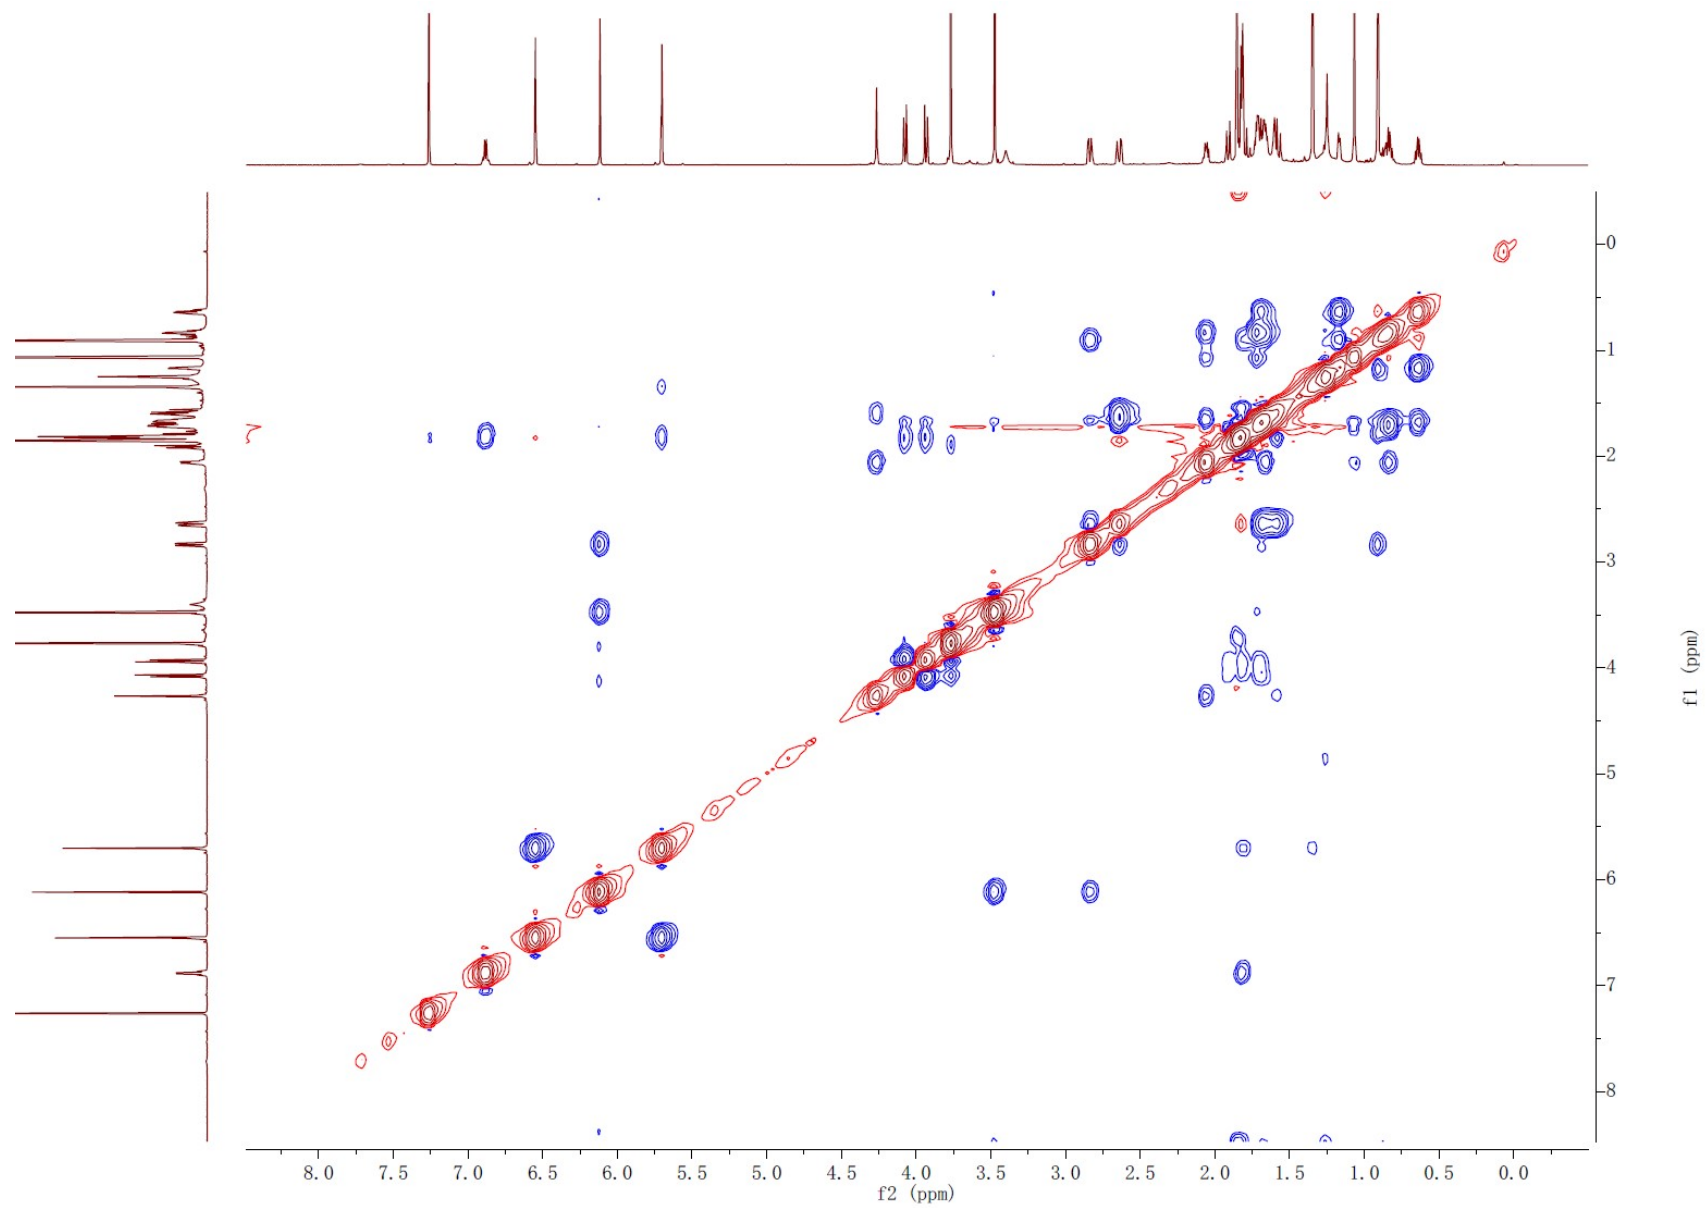

**Fig. S6** ROESY spectrum of compound **1** in  $\text{CDCl}_3$ .



## User Spectra

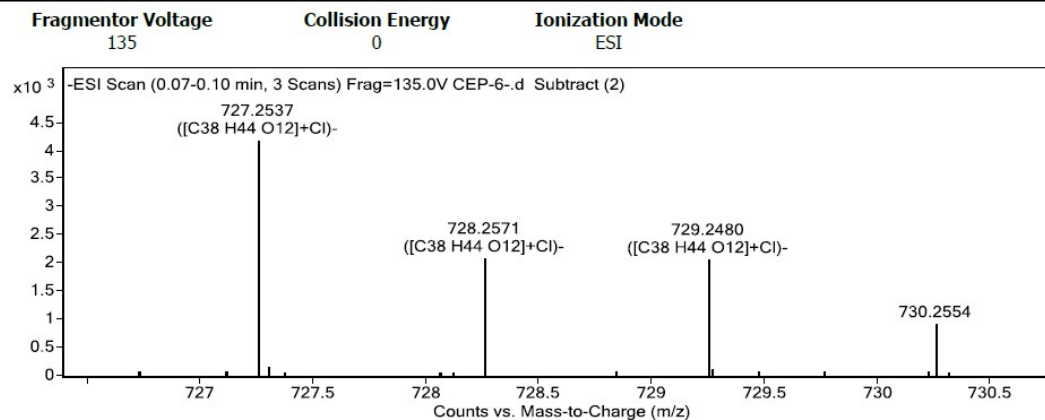

### Peak List

| m/z      | z | Abund    | Formula                                         | Ion                 |
|----------|---|----------|-------------------------------------------------|---------------------|
| 339.2328 | 1 | 87750.82 |                                                 |                     |
| 340.2361 | 1 | 23672.75 |                                                 |                     |
| 375.275  | 1 | 5875.43  |                                                 |                     |
| 403.3064 | 1 | 5329.96  |                                                 |                     |
| 613.2284 | 1 | 4510.04  |                                                 |                     |
| 681.2542 | 1 | 7694.38  |                                                 |                     |
| 695.2703 | 1 | 11740.21 |                                                 |                     |
| 696.274  | 1 | 4995.23  |                                                 |                     |
| 709.2492 | 1 | 5317.38  |                                                 |                     |
| 723.2644 | 1 | 9660.23  |                                                 |                     |
| 727.2537 | 1 | 4187.47  | C <sub>38</sub> H <sub>44</sub> O <sub>12</sub> | (M+Cl) <sup>-</sup> |
| 737.2806 | 1 | 6794.96  |                                                 |                     |
| 740.2577 | 1 | 6090.63  |                                                 |                     |
| 754.2713 | 1 | 7473.97  |                                                 |                     |

### Formula Calculator Element Limits

| Element | Min | Max |
|---------|-----|-----|
| C       | 3   | 60  |
| H       | 0   | 120 |
| O       | 0   | 30  |

### Formula Calculator Results

| Formula                                         | CalculatedMass | CalculatedMz | Mz       | Diff. (mDa) | Diff. (ppm) | DBE     |
|-------------------------------------------------|----------------|--------------|----------|-------------|-------------|---------|
| C <sub>38</sub> H <sub>44</sub> O <sub>12</sub> | 692.2833       | 727.2527     | 727.2537 | -1.00       | -1.38       | 17.0000 |

Fig. S7 HRESI (+) MS spectrum of compound 1.

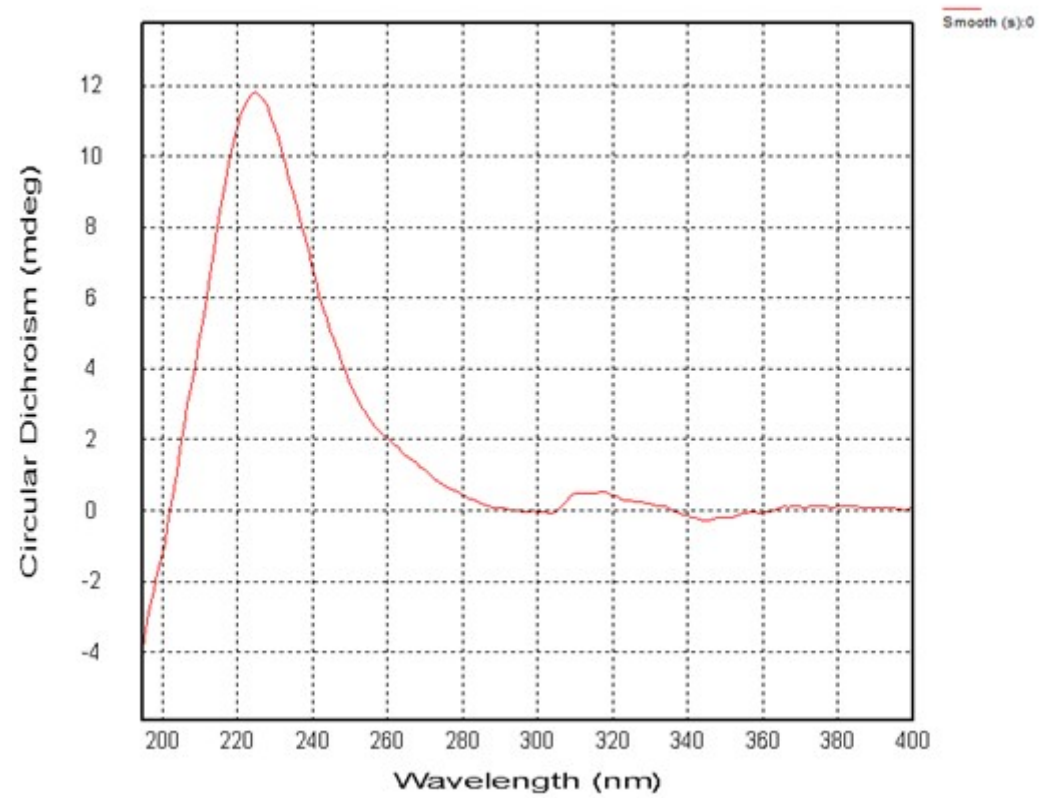

**Fig. S8** CD spectrum of compound **1**.

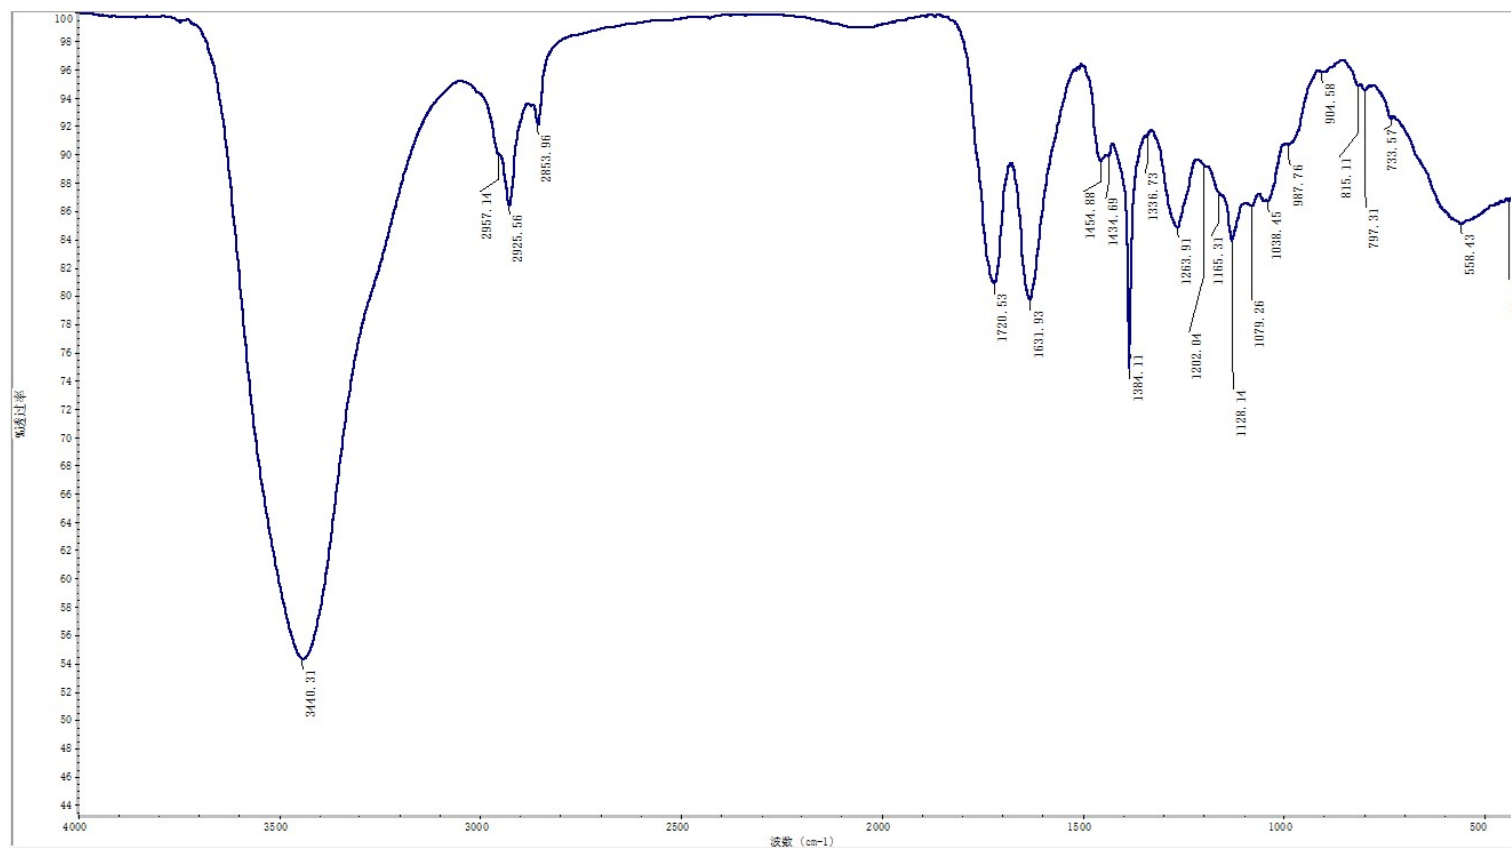

Sample Name: CEP-6

KBr压片

采集时间: 星期三 9月 08 19:32:34 2021 (GMT+08:00)

仪器型号: NICOLET iS10

Software version: OMNIC 9.8.372

样品扫描次数: 16

背景扫描次数: 16

分辨率: 4.000

采样增益: 1.0

动镜速度: 0.4747

光阑: 80.00

**Fig. S9** IR spectrum of compound **1**.

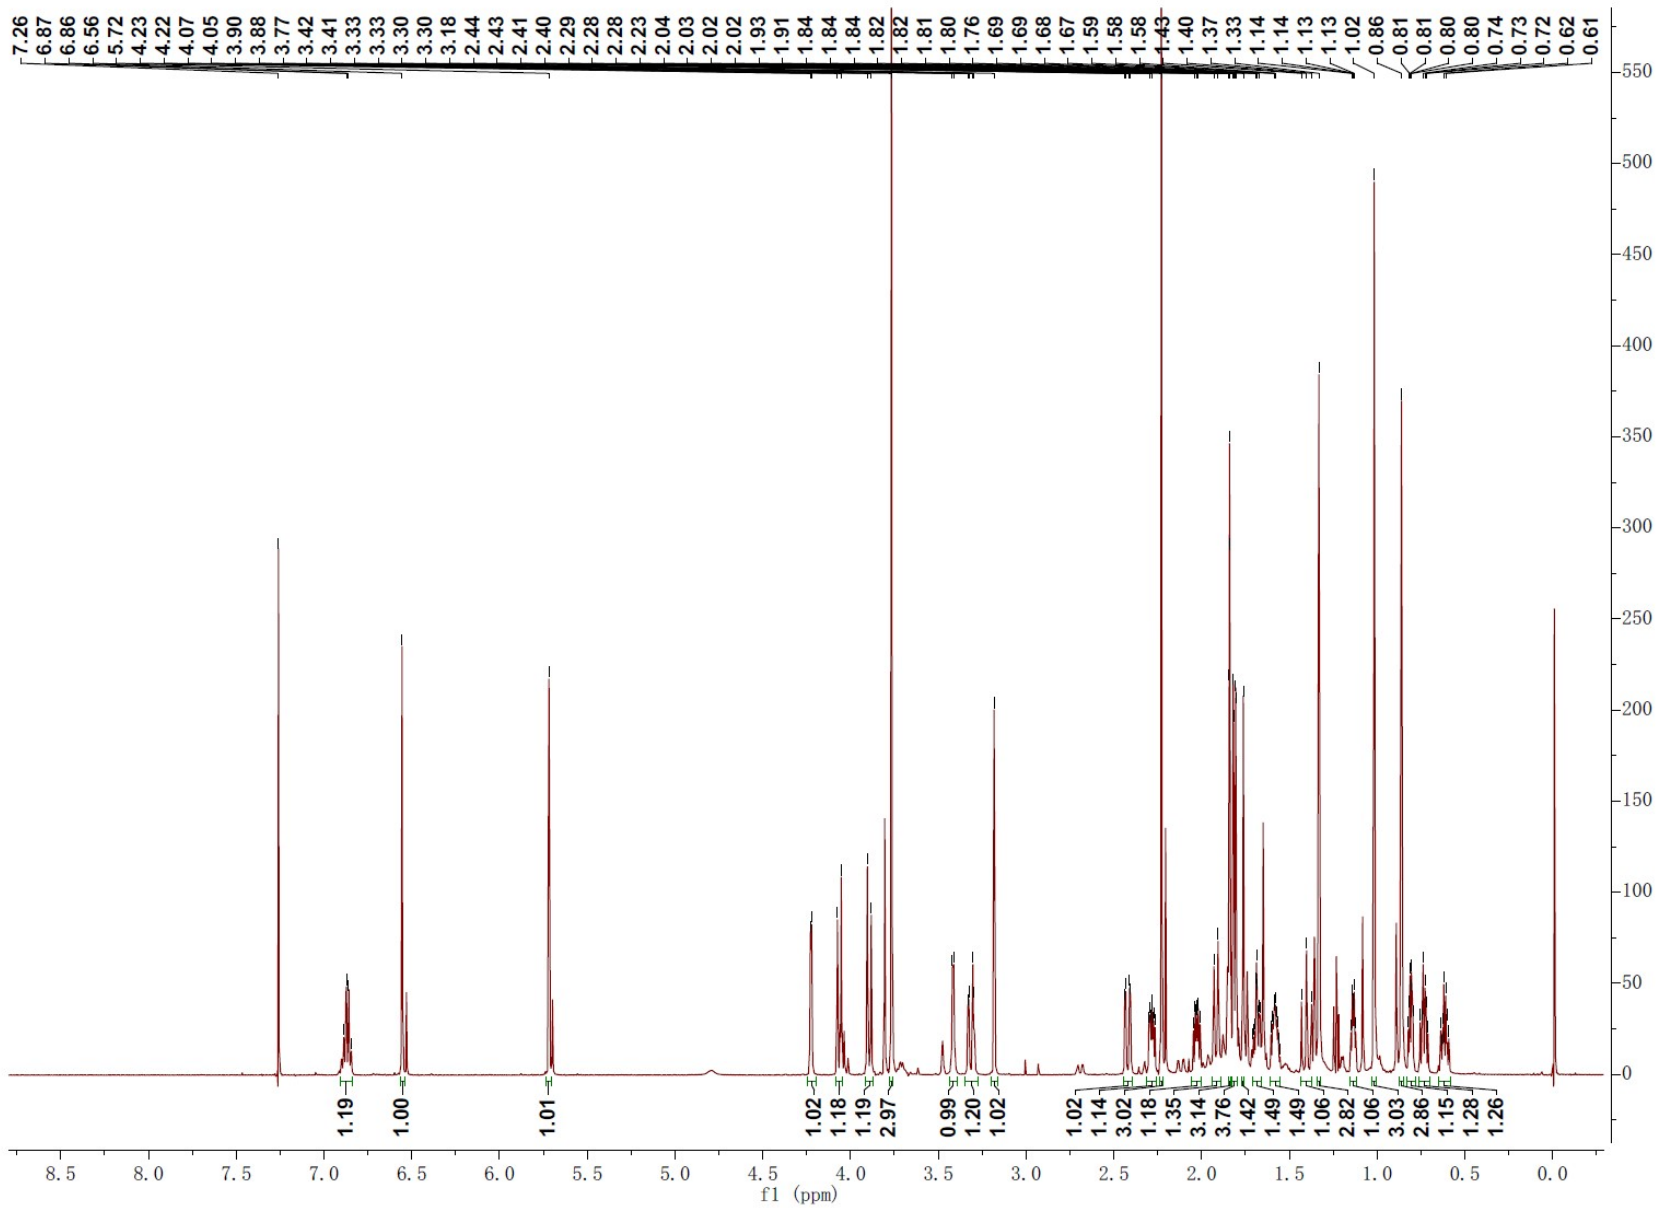

Fig. S10  $^1\text{H}$  NMR spectrum (500 MHz) of compound **2** in  $\text{CDCl}_3$ .

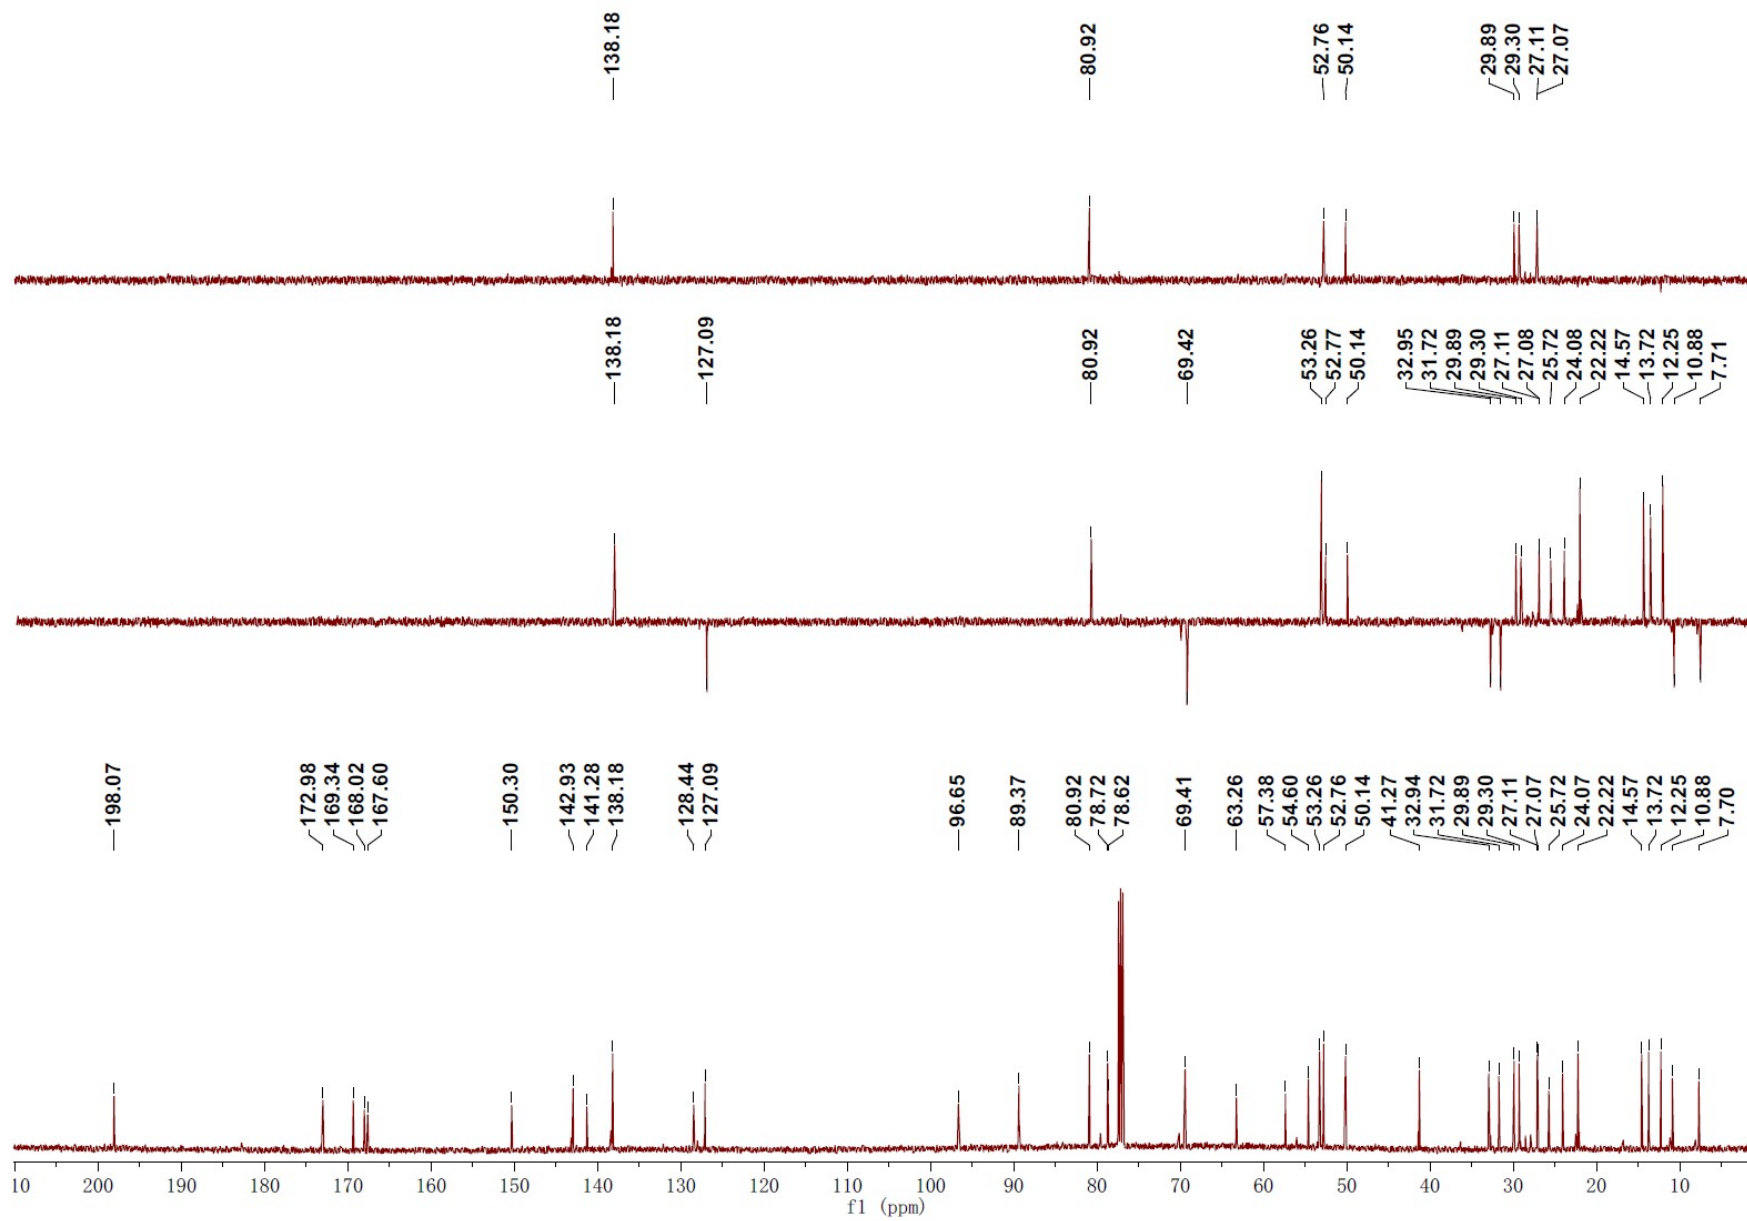

Fig. S11  $^{13}\text{C}$  NMR spectrum (125 MHz) of compound 2 in  $\text{CDCl}_3$ .

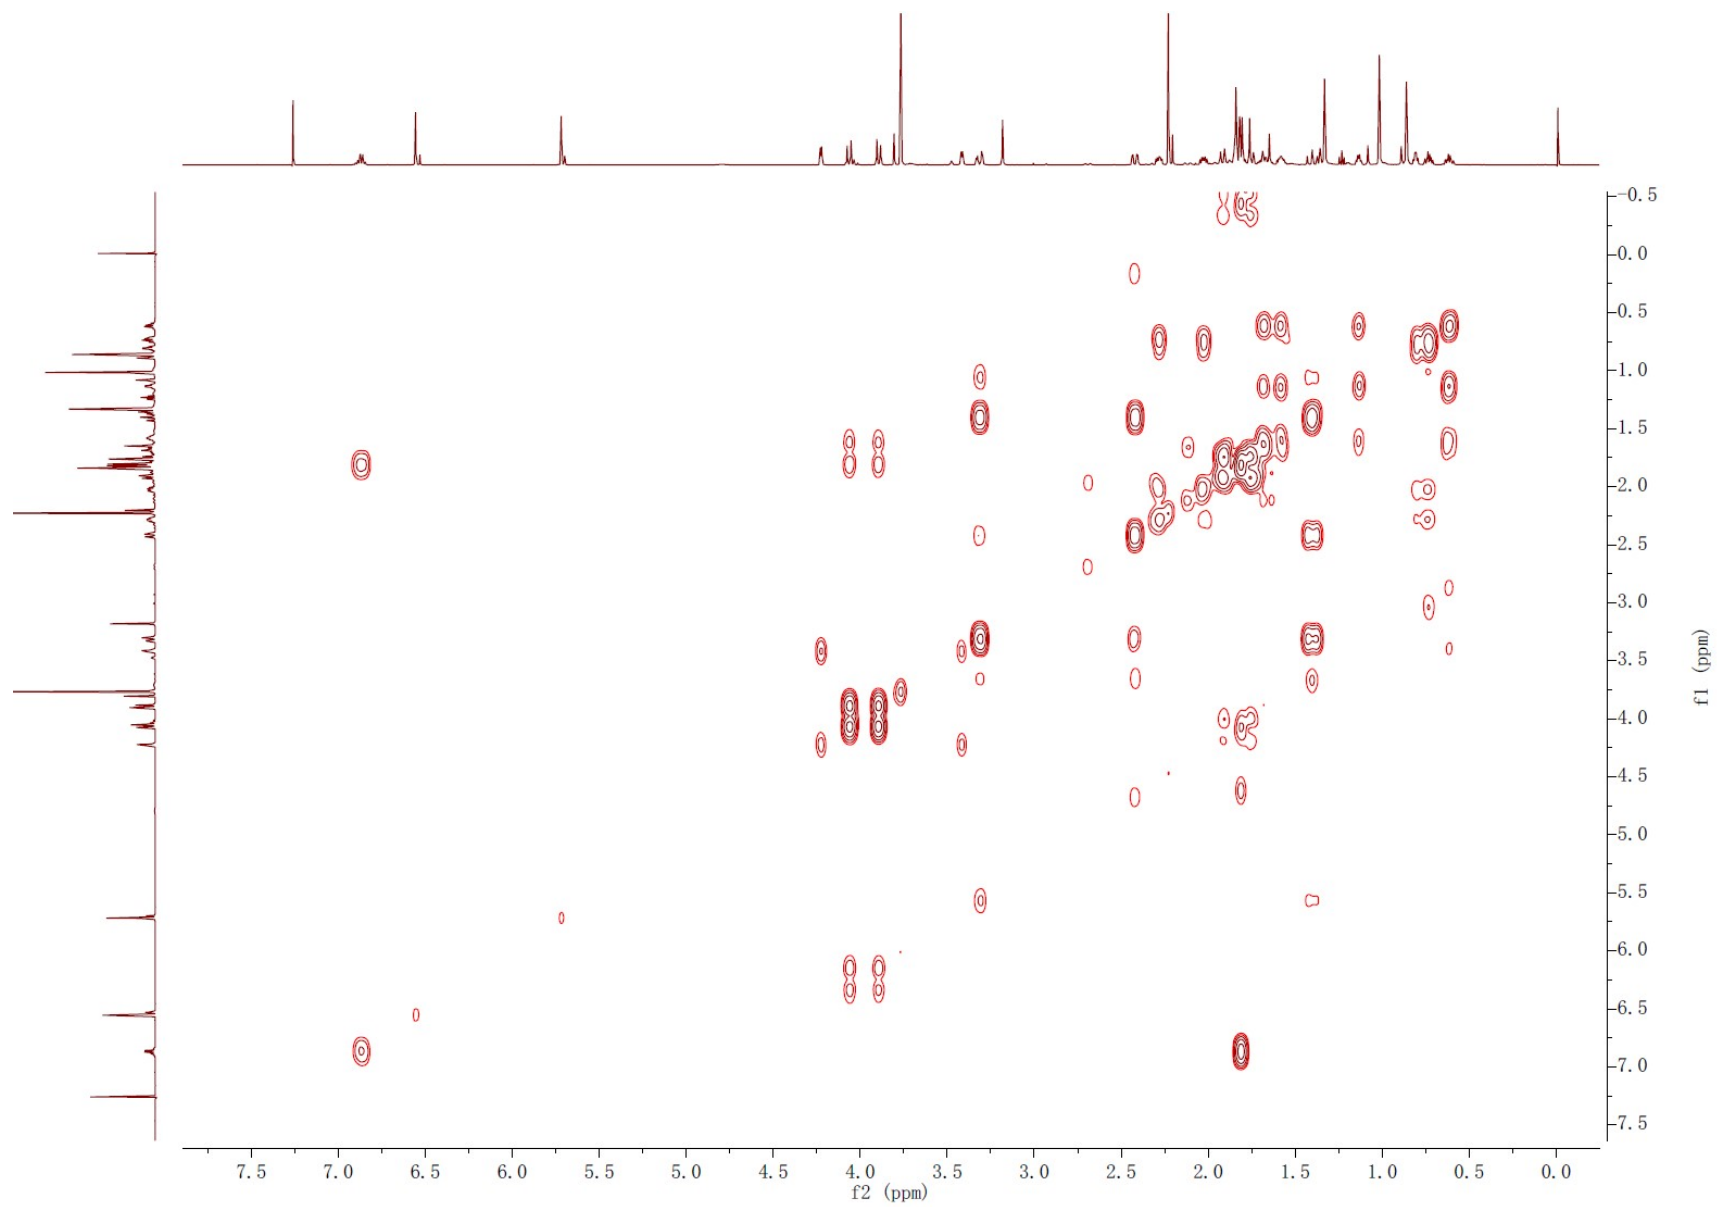

**Fig. S12**  $^1\text{H}$ - $^1\text{H}$  COSY spectrum of compound **2** in  $\text{CDCl}_3$ .

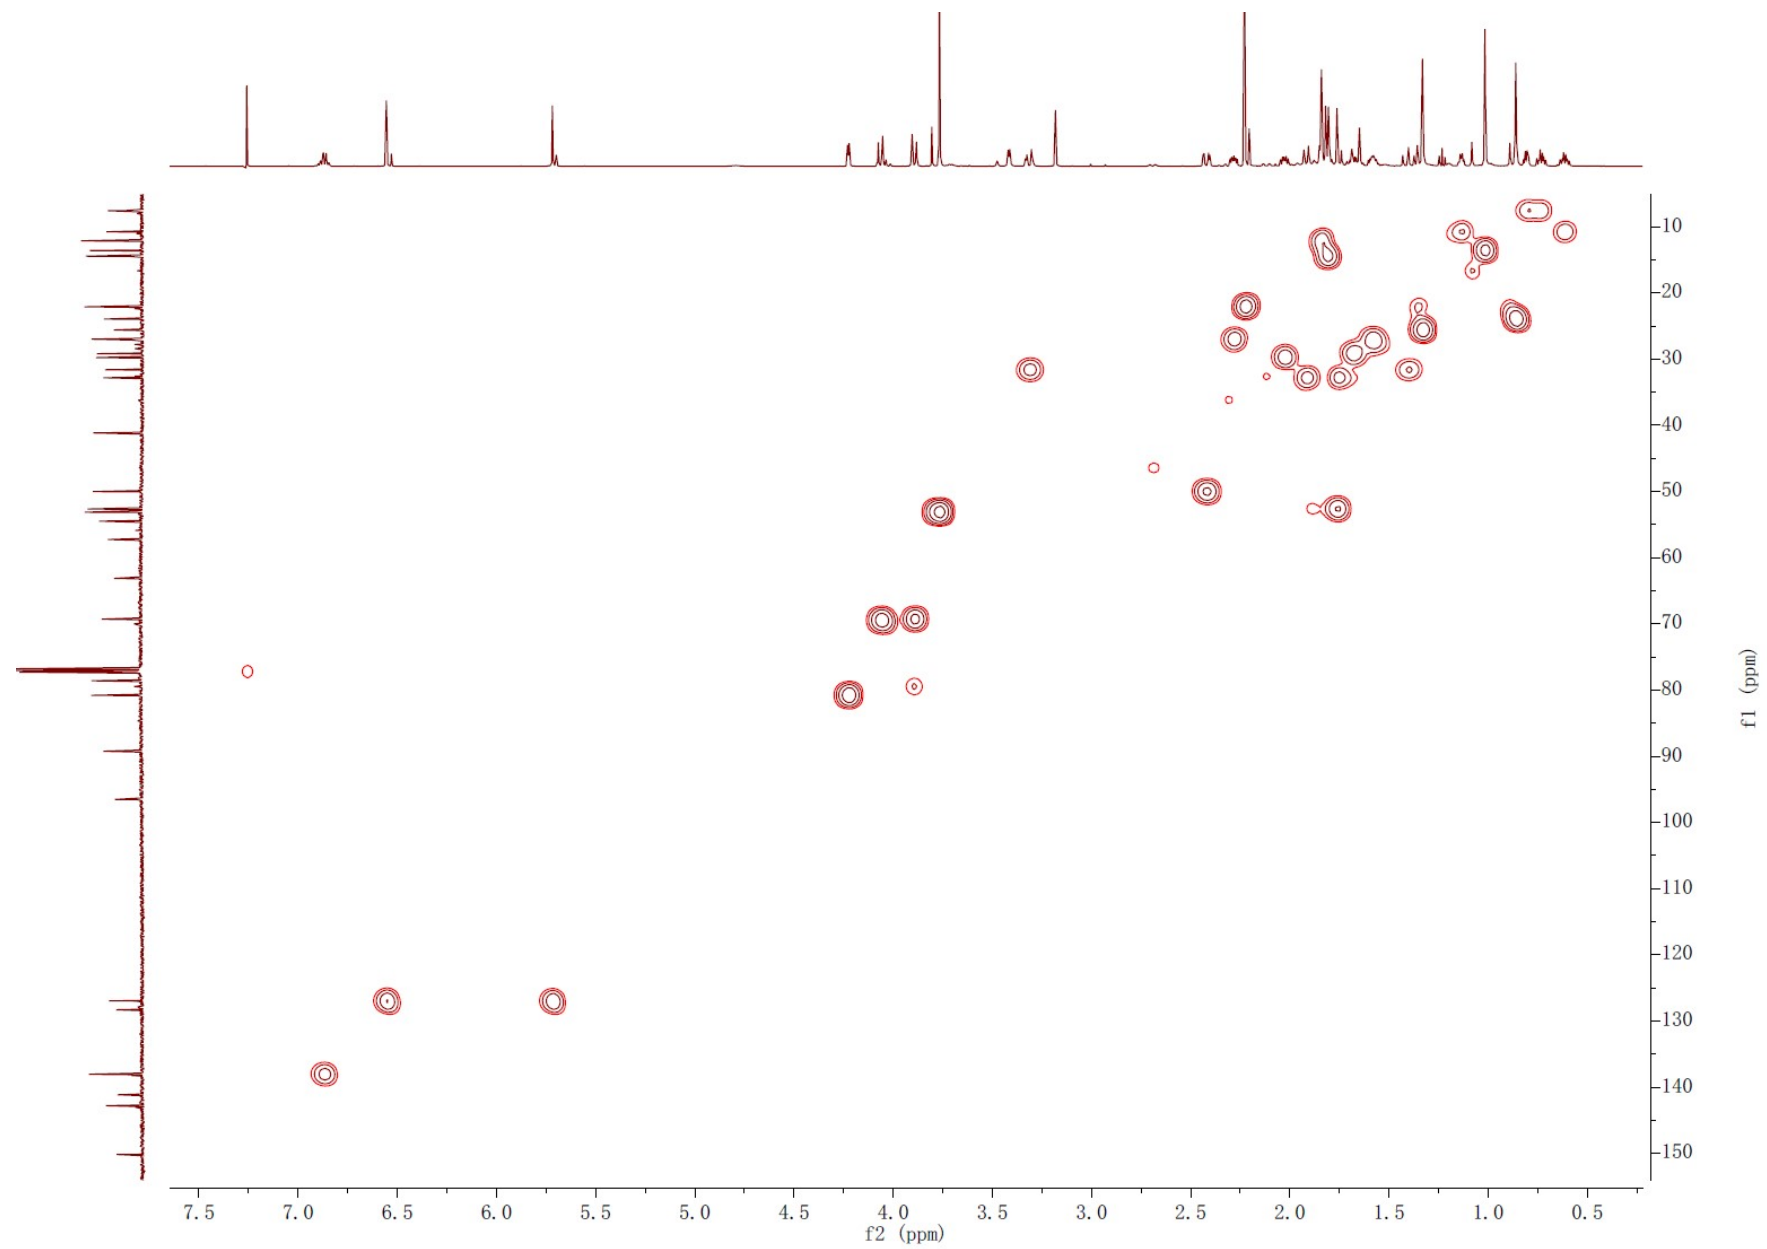

**Fig. S13** HSQC spectrum of compound **2** in CDCl<sub>3</sub>.

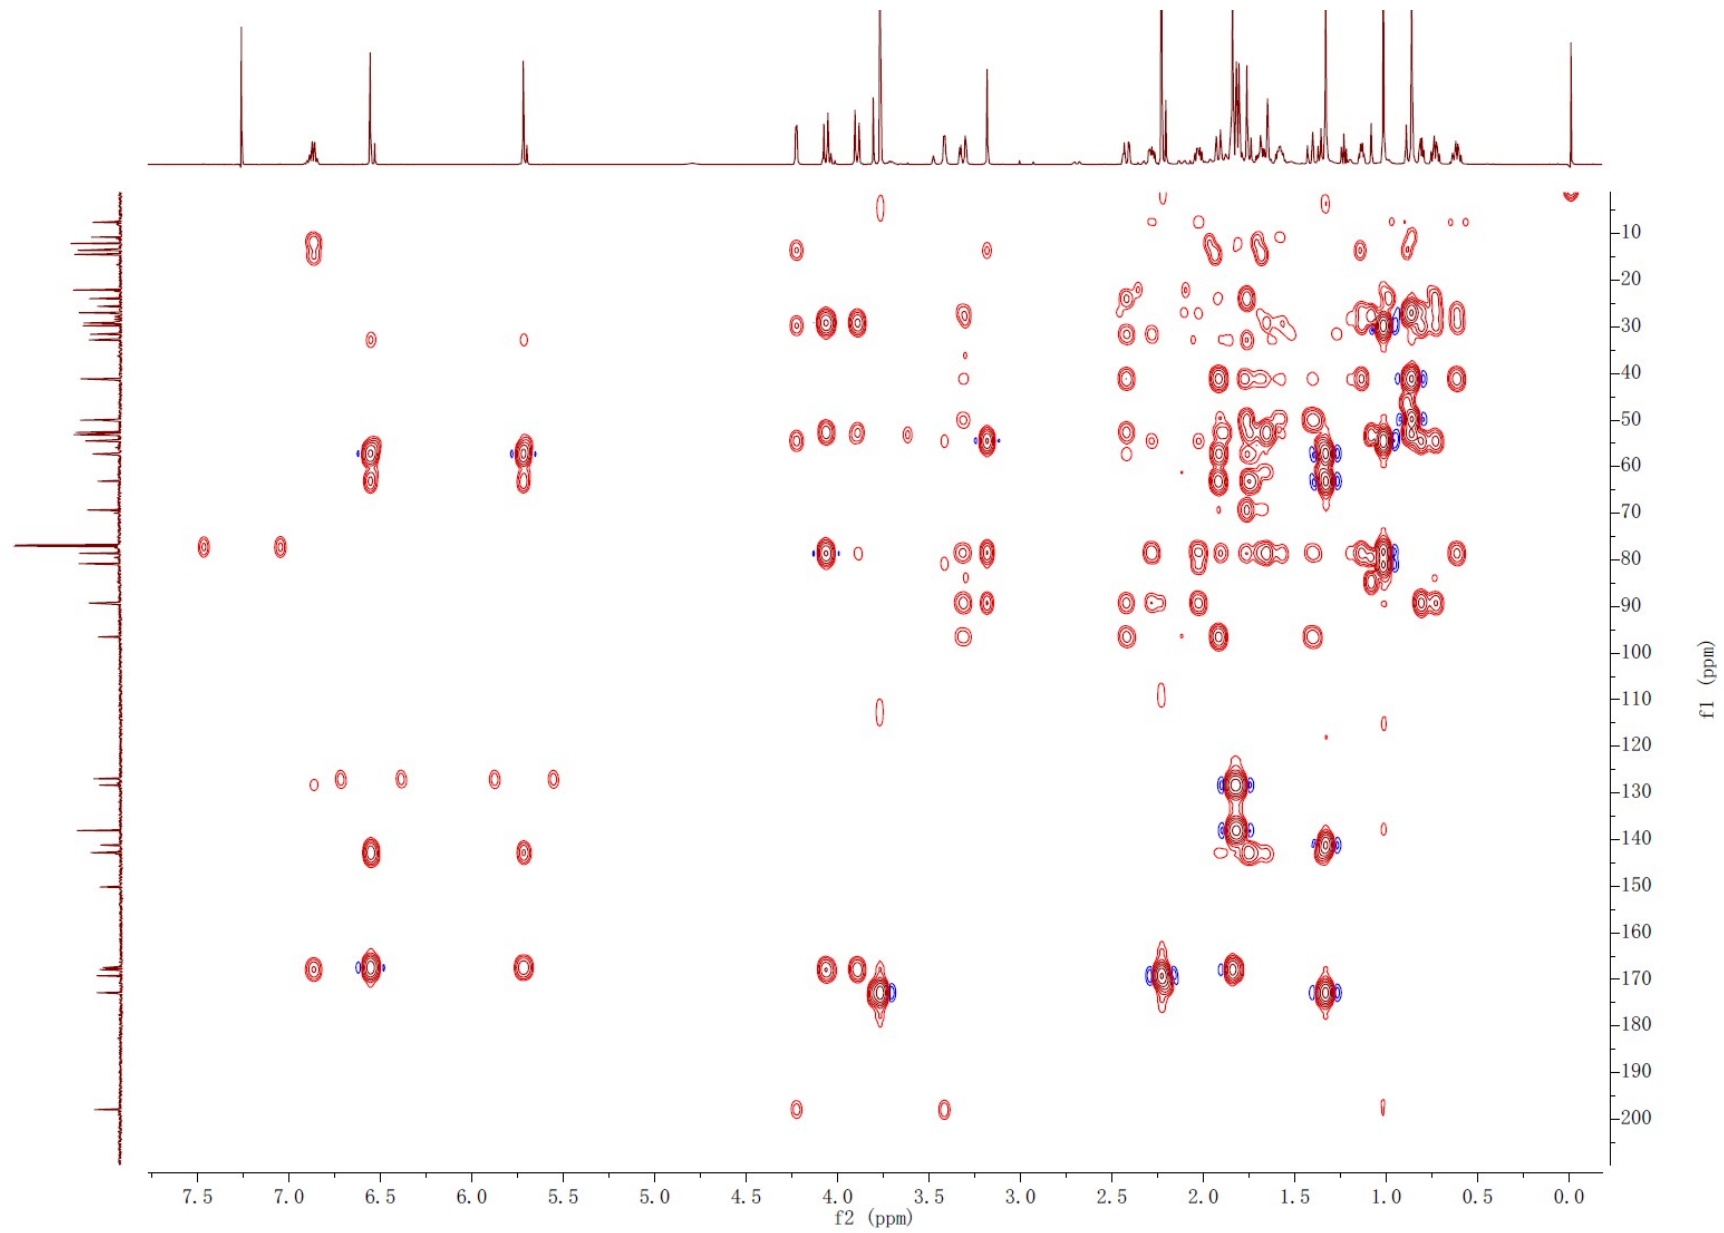

**Fig. S14** HMBC spectrum of compound **2** in  $\text{CDCl}_3$ .



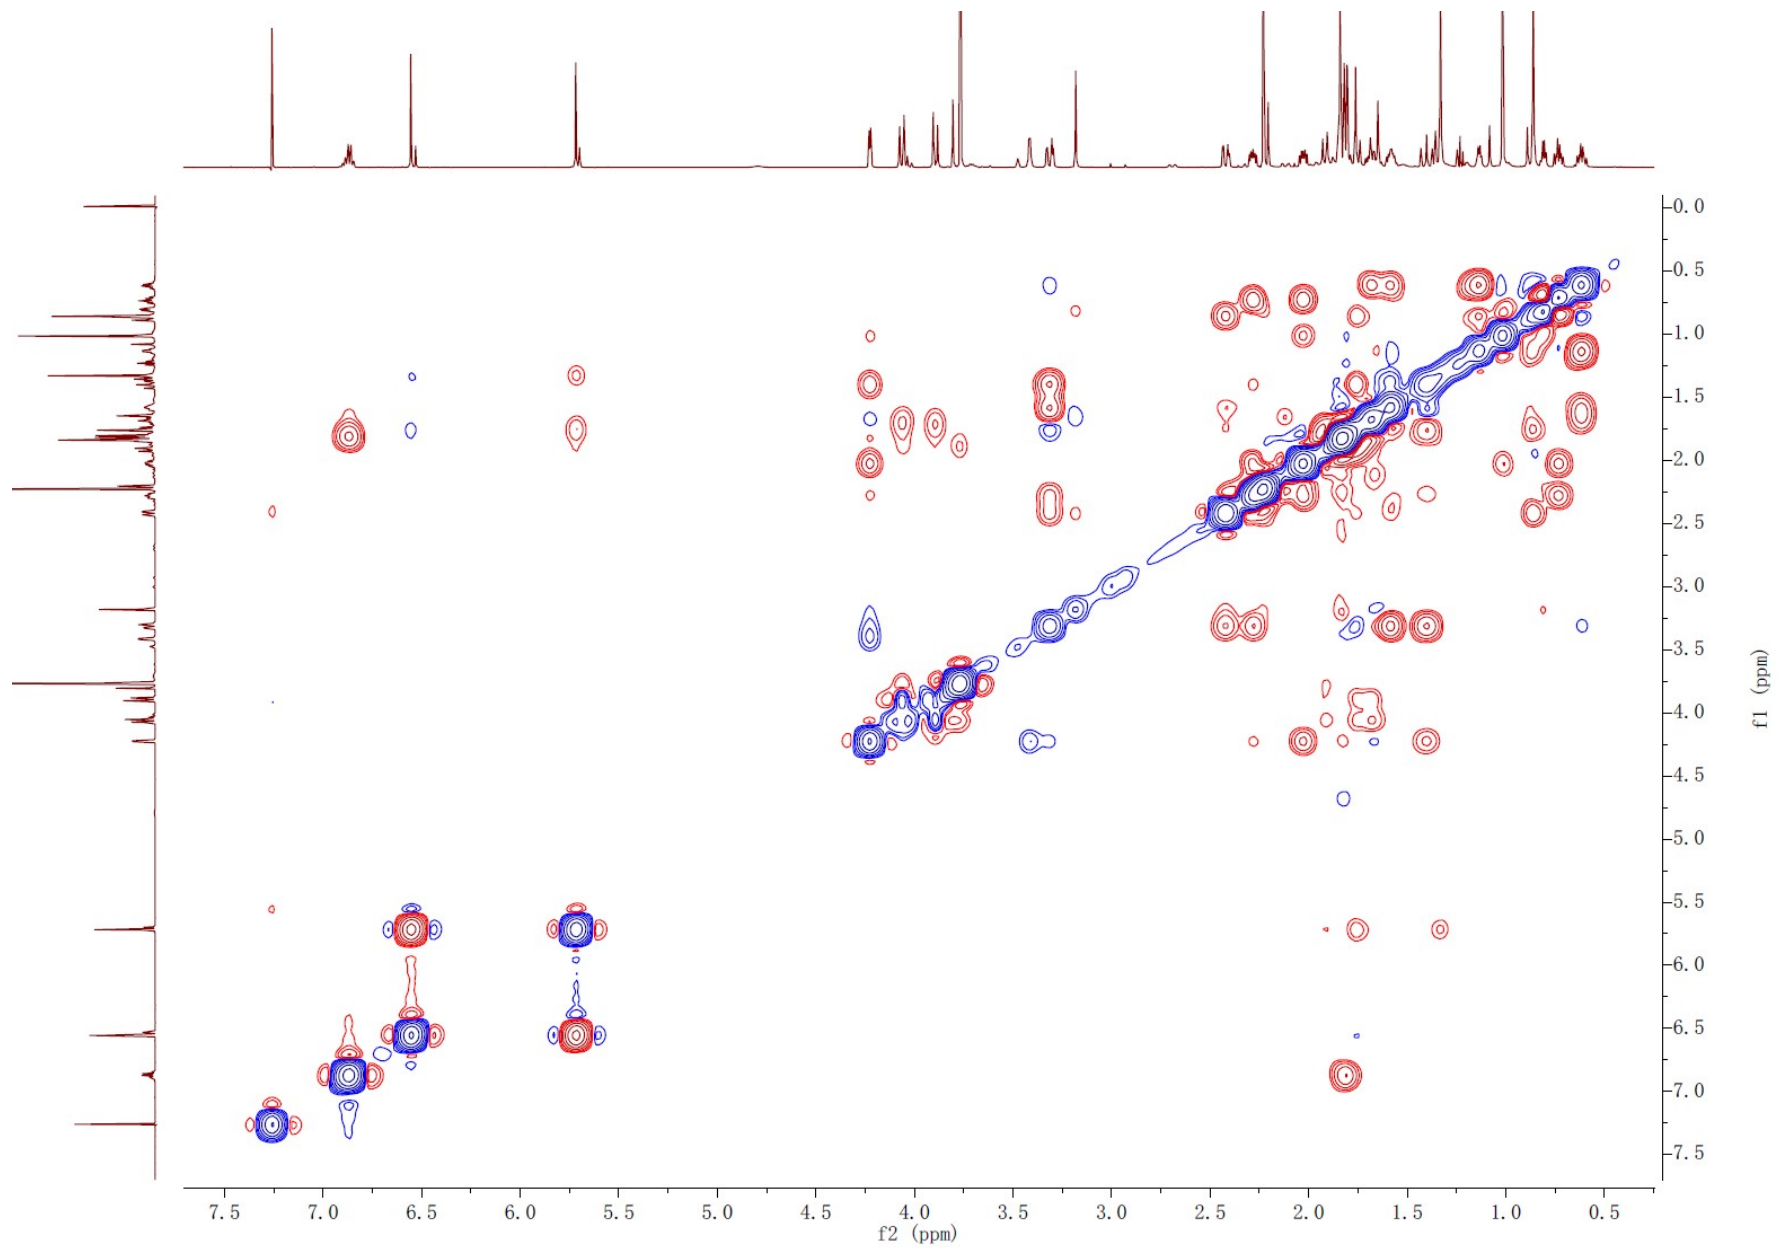

**Fig. S15** ROESY spectrum of compound **2** in  $\text{CDCl}_3$ .

## User Spectra

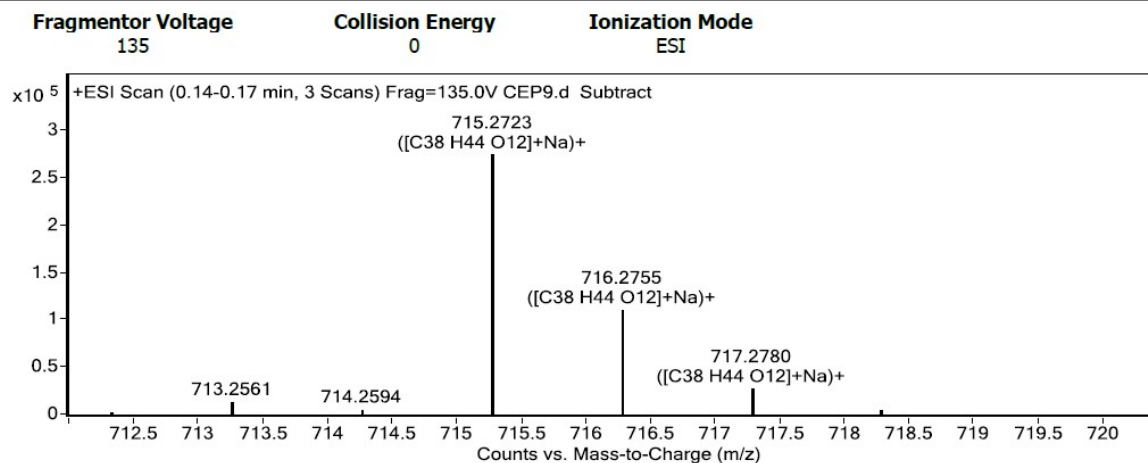

### Peak List

| m/z       | z | Abund     | Formula     | Ion     |
|-----------|---|-----------|-------------|---------|
| 655.2505  | 1 | 29179.3   |             |         |
| 710.3165  | 1 | 31586.91  |             |         |
| 715.2723  | 1 | 275452.88 | C38 H44 O12 | (M+Na)+ |
| 716.2755  | 1 | 111275.16 | C38 H44 O12 | (M+Na)+ |
| 717.278   | 1 | 27890.61  | C38 H44 O12 | (M+Na)+ |
| 731.2462  | 1 | 62875.49  |             |         |
| 1407.5551 | 1 | 311097.28 |             |         |
| 1408.5584 | 1 | 252286.73 |             |         |
| 1409.5608 | 1 | 114043.63 |             |         |
| 1410.5632 | 1 | 35389.04  |             |         |

### Formula Calculator Element Limits

| Element | Min | Max |
|---------|-----|-----|
| C       | 3   | 120 |
| H       | 0   | 240 |
| O       | 0   | 50  |

### Formula Calculator Results

| Formula     | CalculatedMass | CalculatedMz | Mz       | Diff. (mDa) | Diff. (ppm) | DBE     |
|-------------|----------------|--------------|----------|-------------|-------------|---------|
| C38 H44 O12 | 692.2833       | 715.2725     | 715.2723 | 0.20        | 0.28        | 17.0000 |

Fig. S16 HRESI (+) MS spectrum of compound 2.

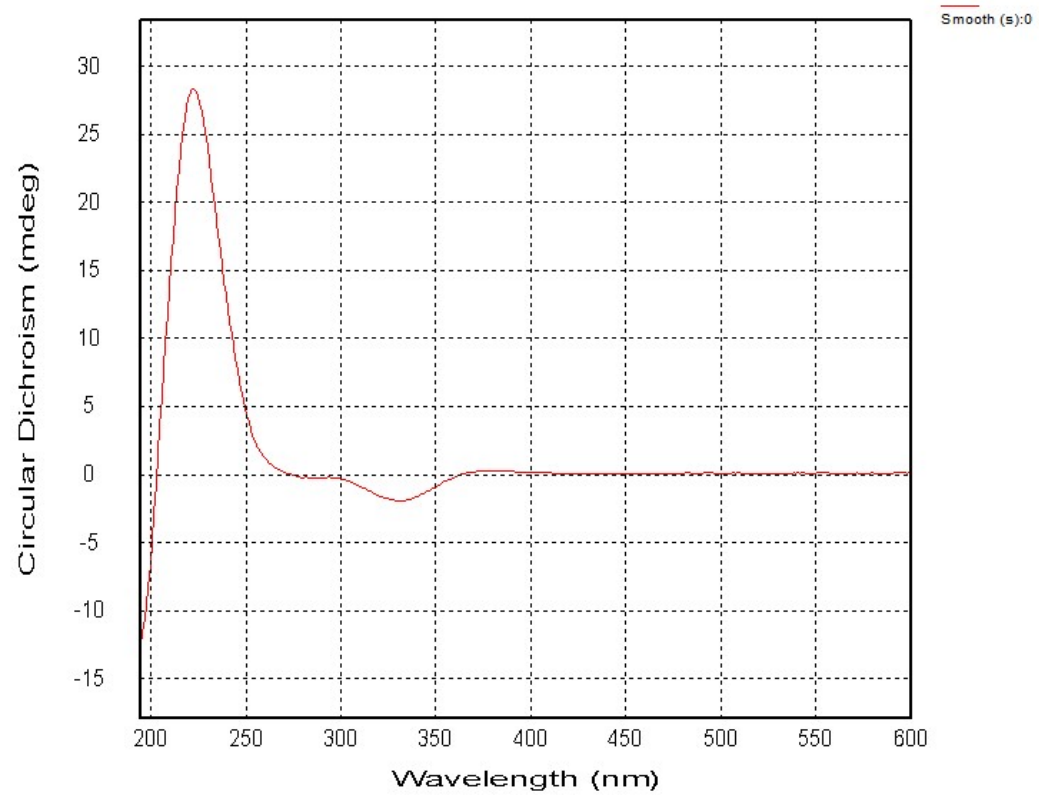

**Fig. S17** CD spectrum of compound **2**.

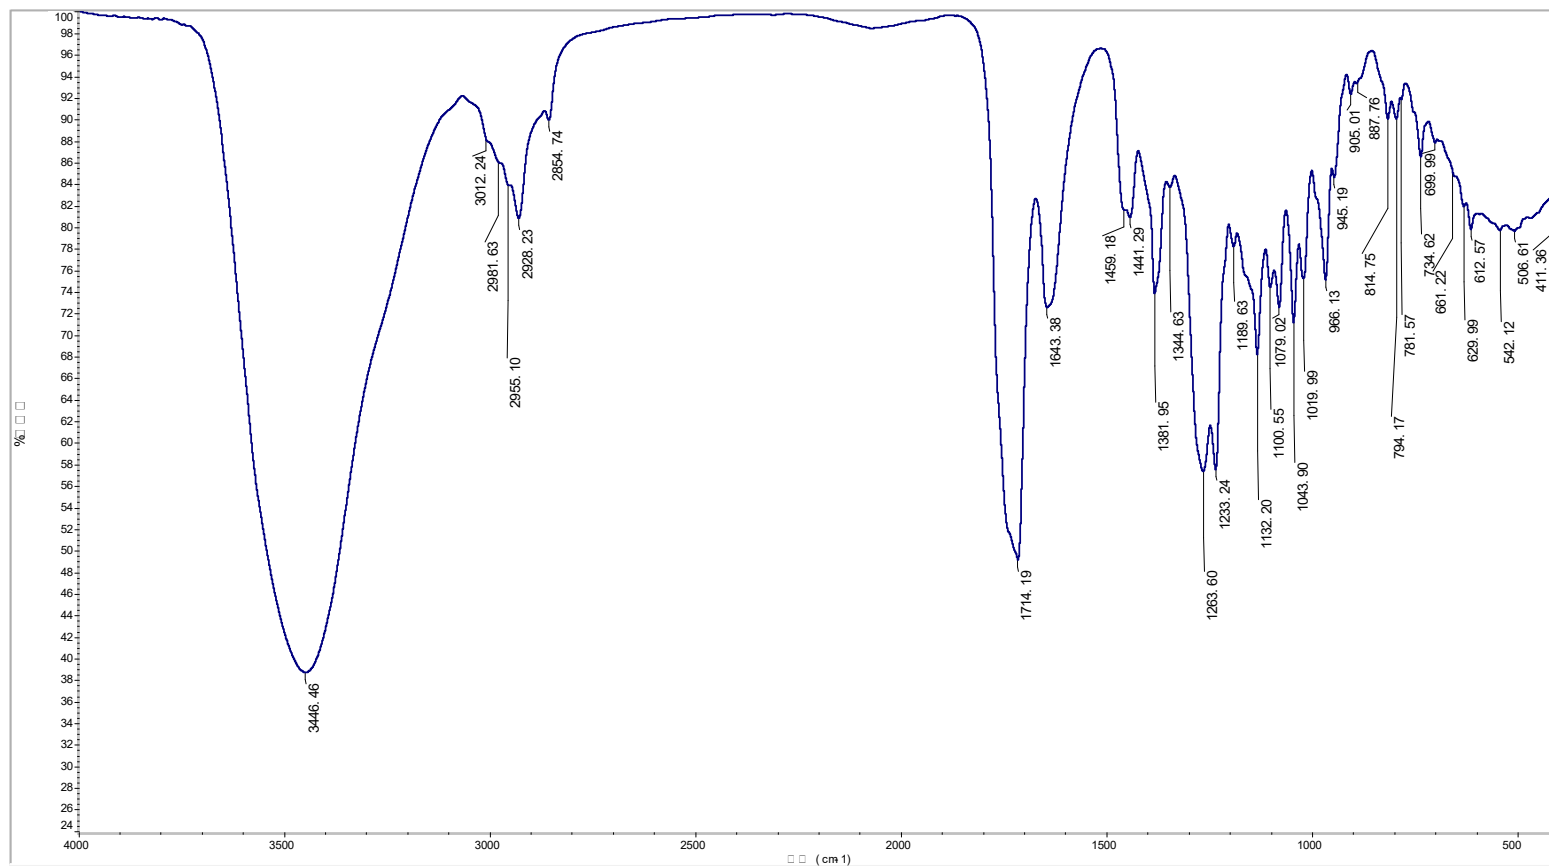

Sample Name: CEP-9

KBr

: 9 08 20:08:07 2021 (GMT+08:00)

NI COLET iS10

Software version: OMNIC 9.8.372

: 16  
 : 16  
 : 4.000  
 : 1.0  
 : 0.4747  
 : 80.00

Fig. S18 IR spectrum of compound 2.

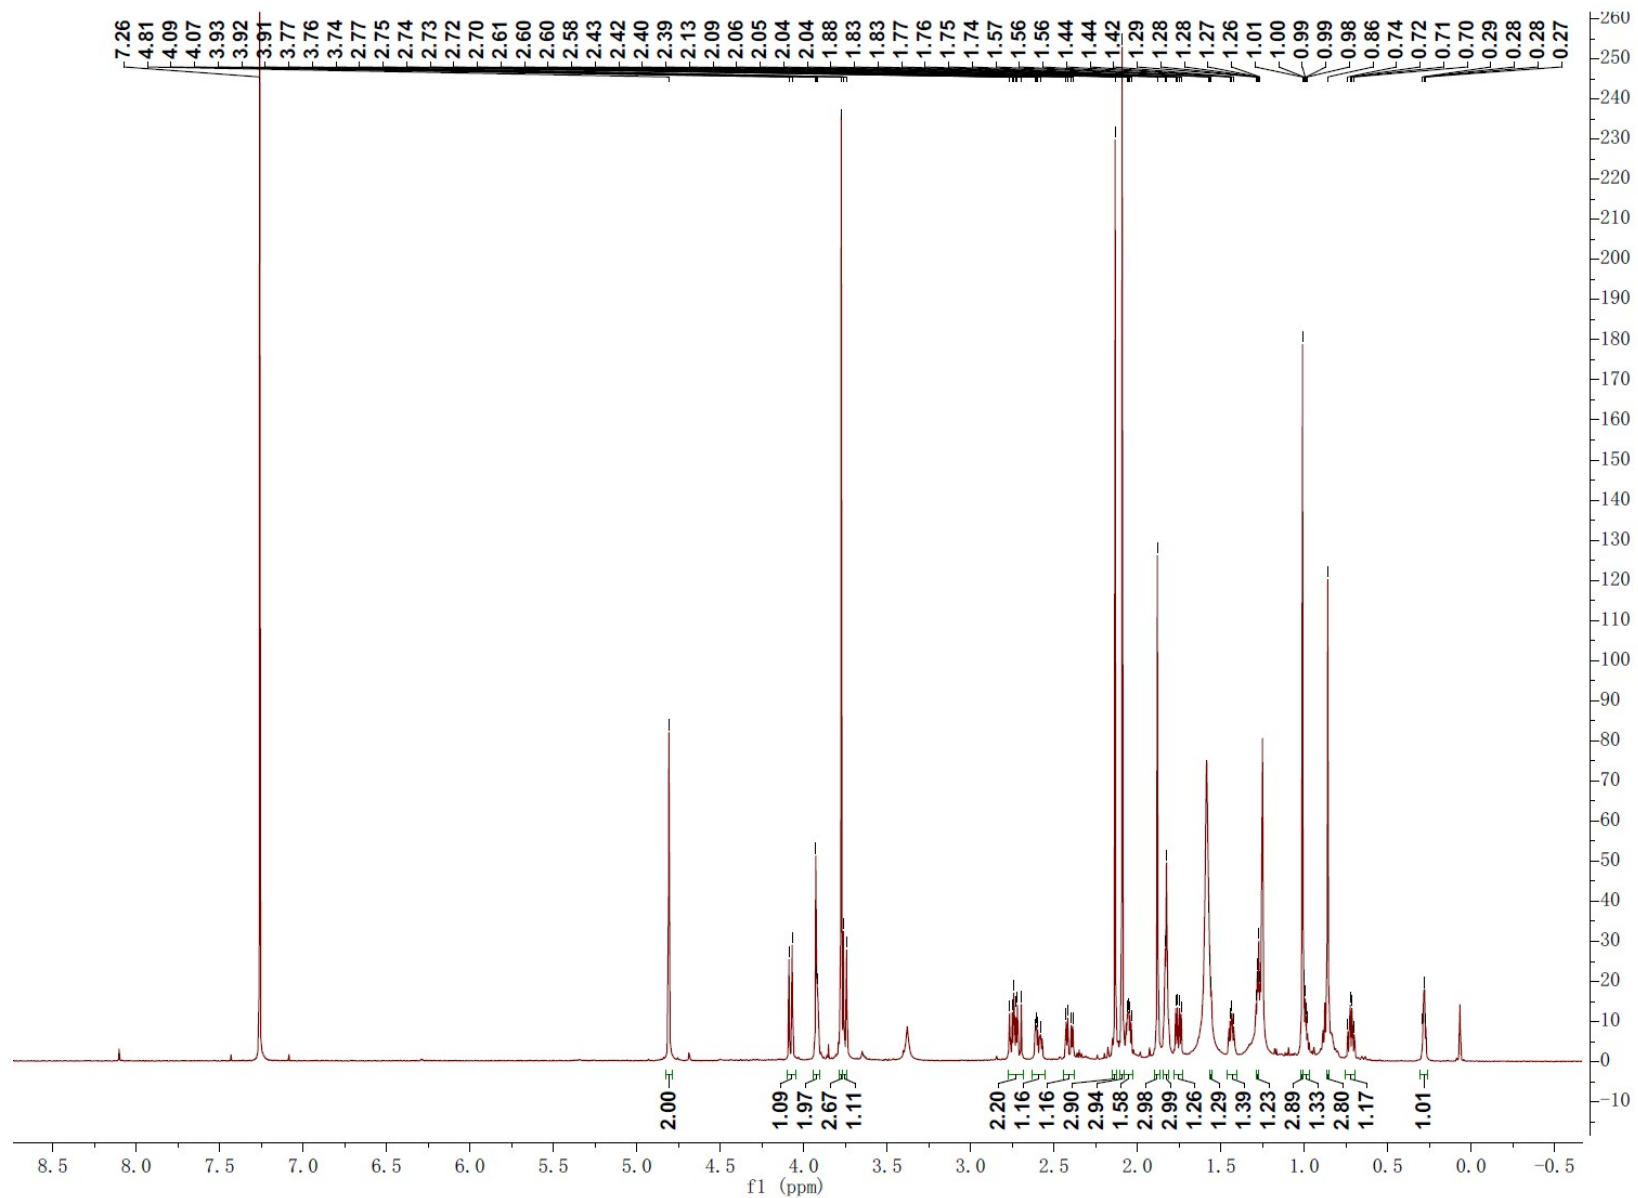

Fig. S19  $^1\text{H}$  NMR spectrum (600 MHz) of compound **3** in  $\text{CDCl}_3$ .

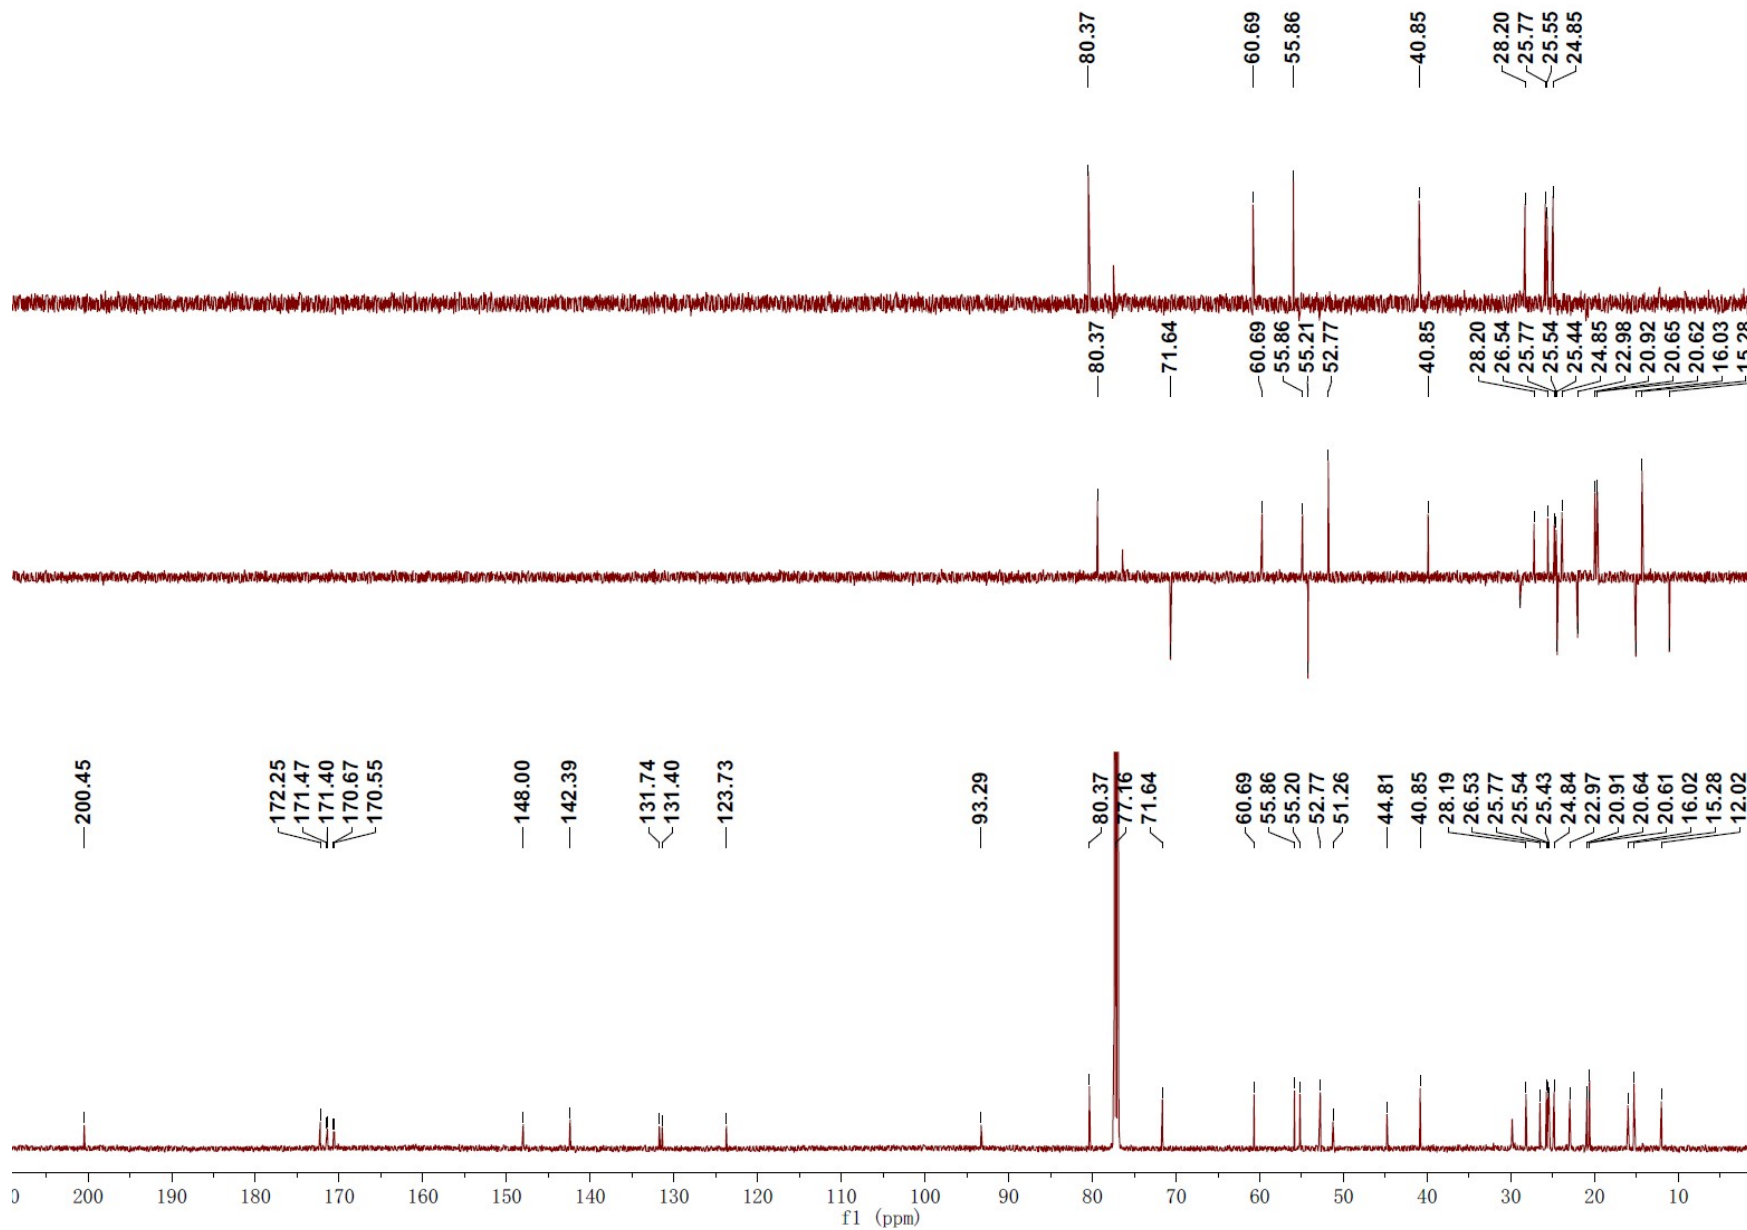

Fig. S20  $^{13}\text{C}$  NMR spectrum (150 MHz) of compound **3** in  $\text{CDCl}_3$ .

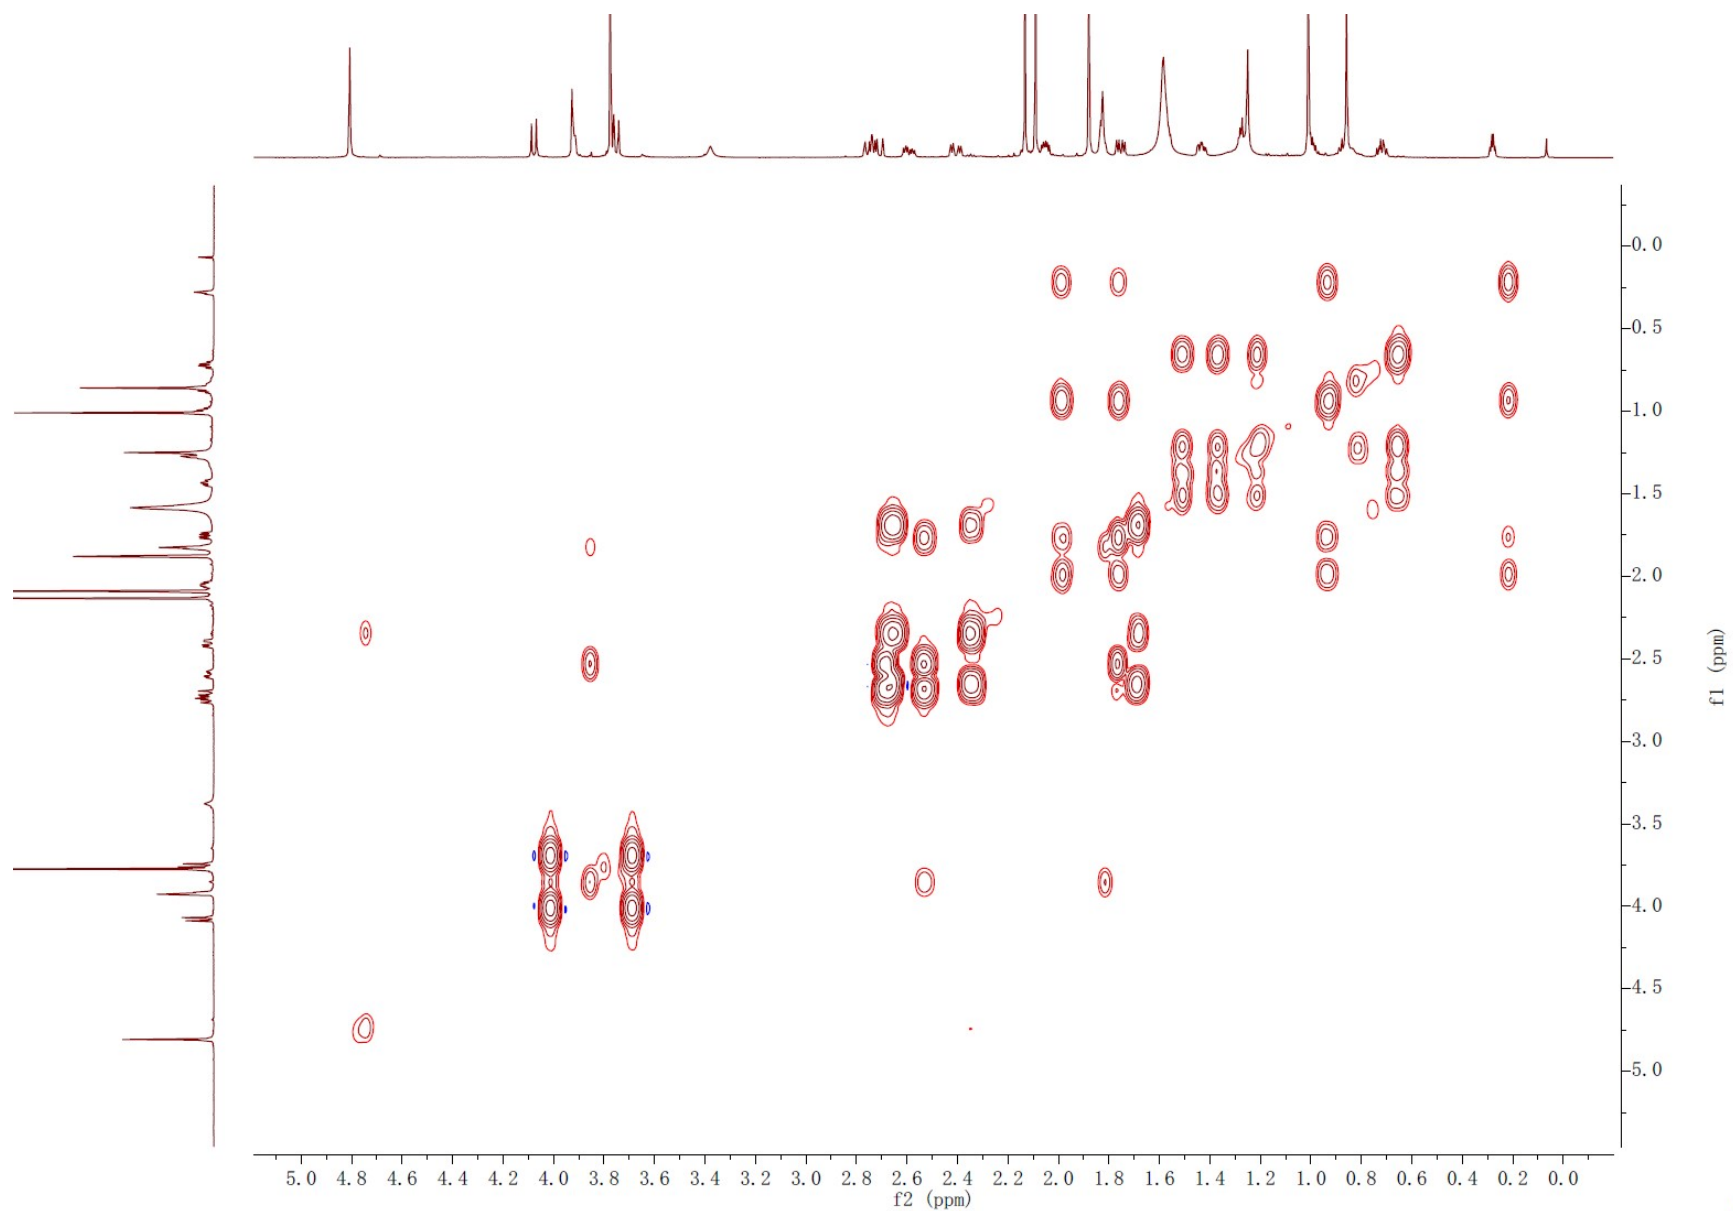

**Fig. S21**  $^1\text{H}$ - $^1\text{H}$  COSY spectrum of compound **3** in  $\text{CDCl}_3$ .

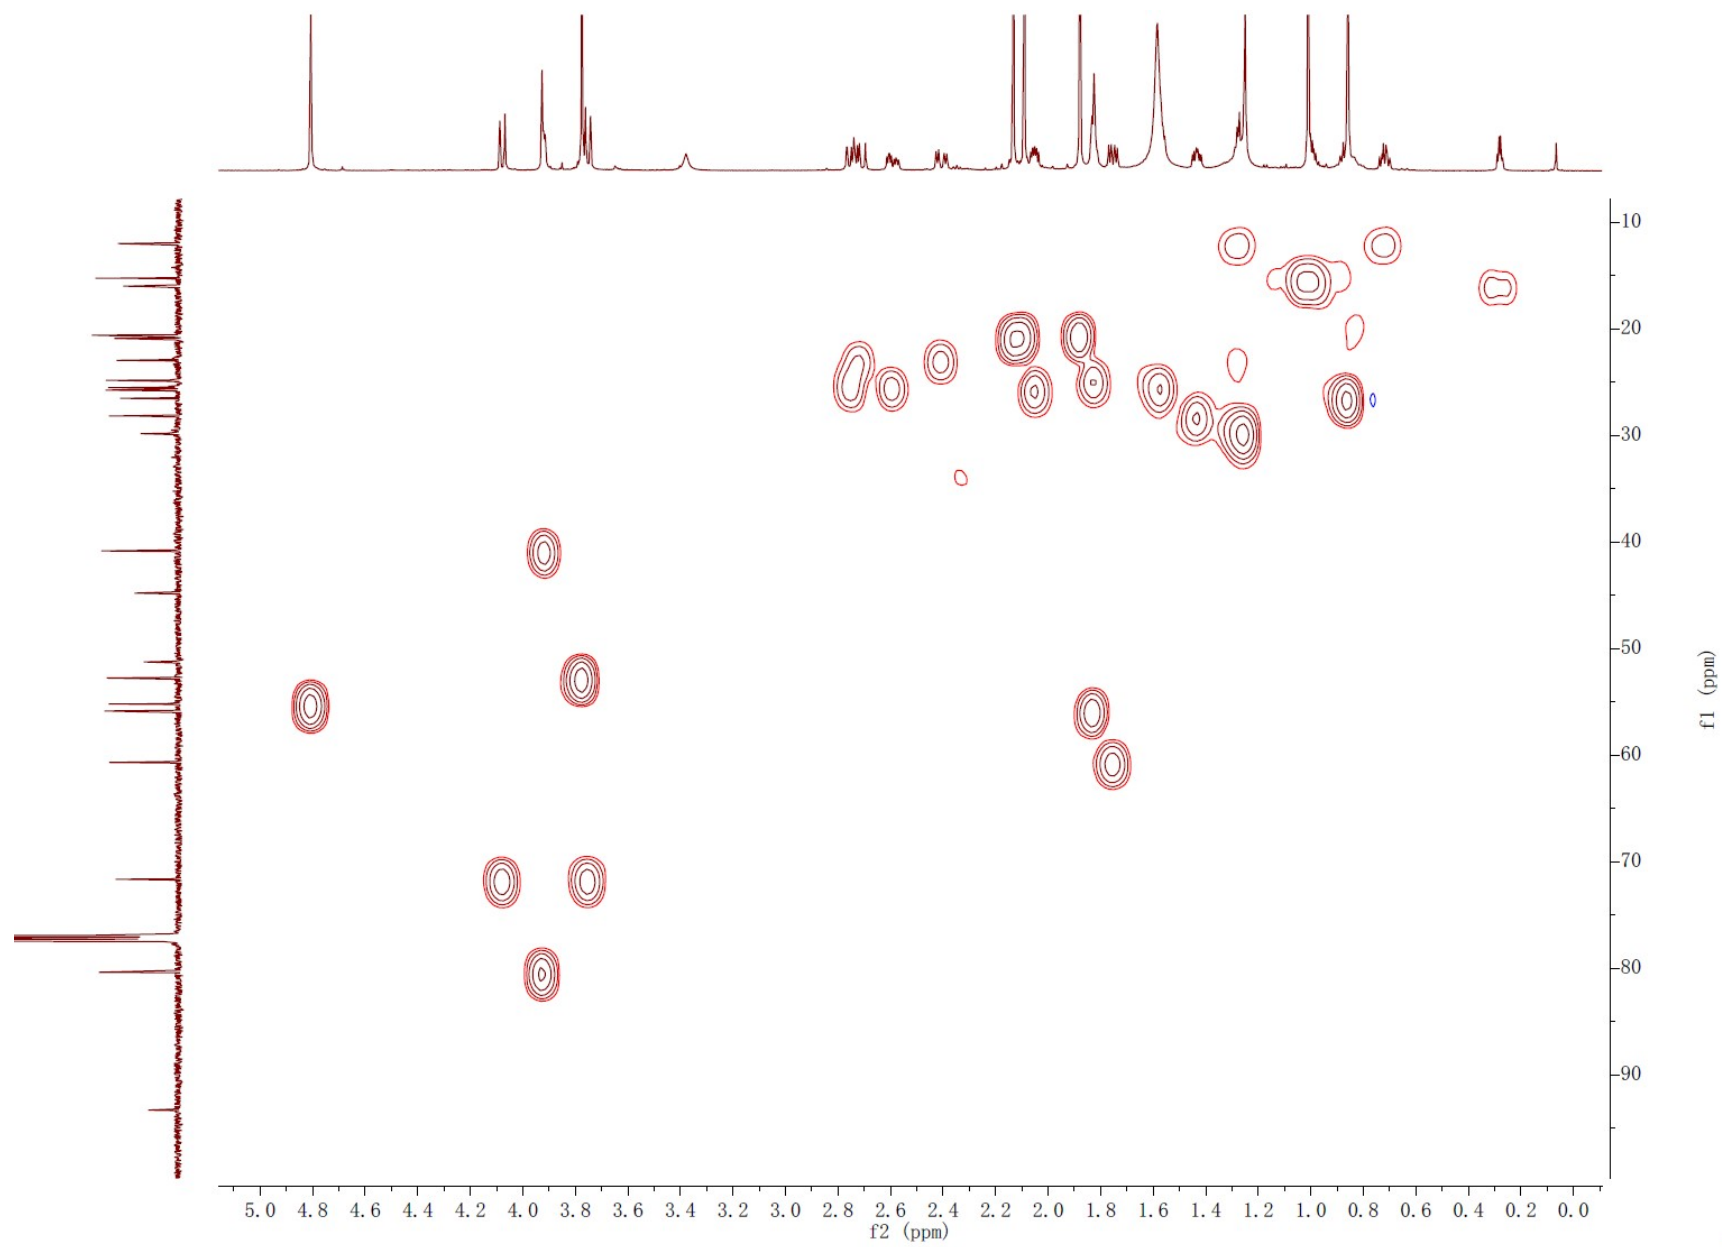

**Fig. S22** HSQC spectrum of compound **3** in CDCl<sub>3</sub>.



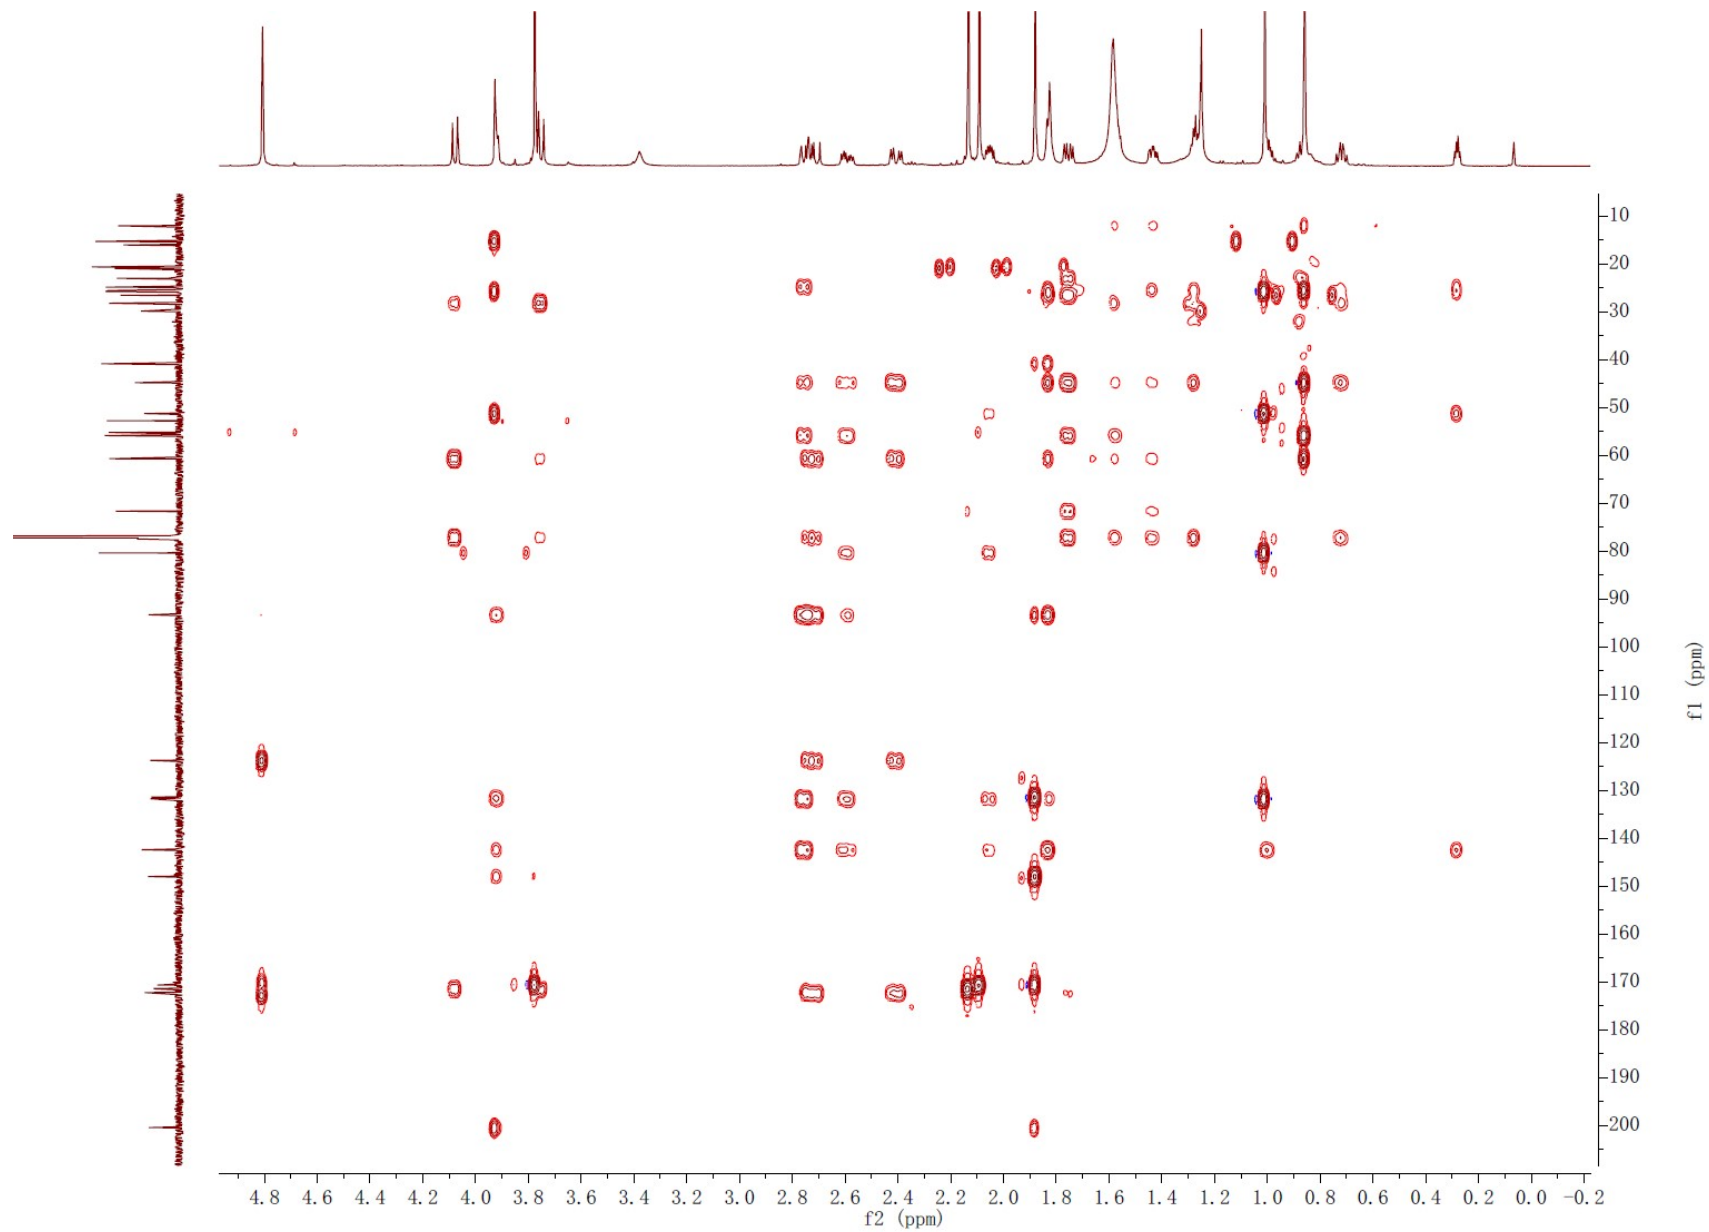

Fig. S23 HMBC spectrum of compound **3** in CDCl<sub>3</sub>.

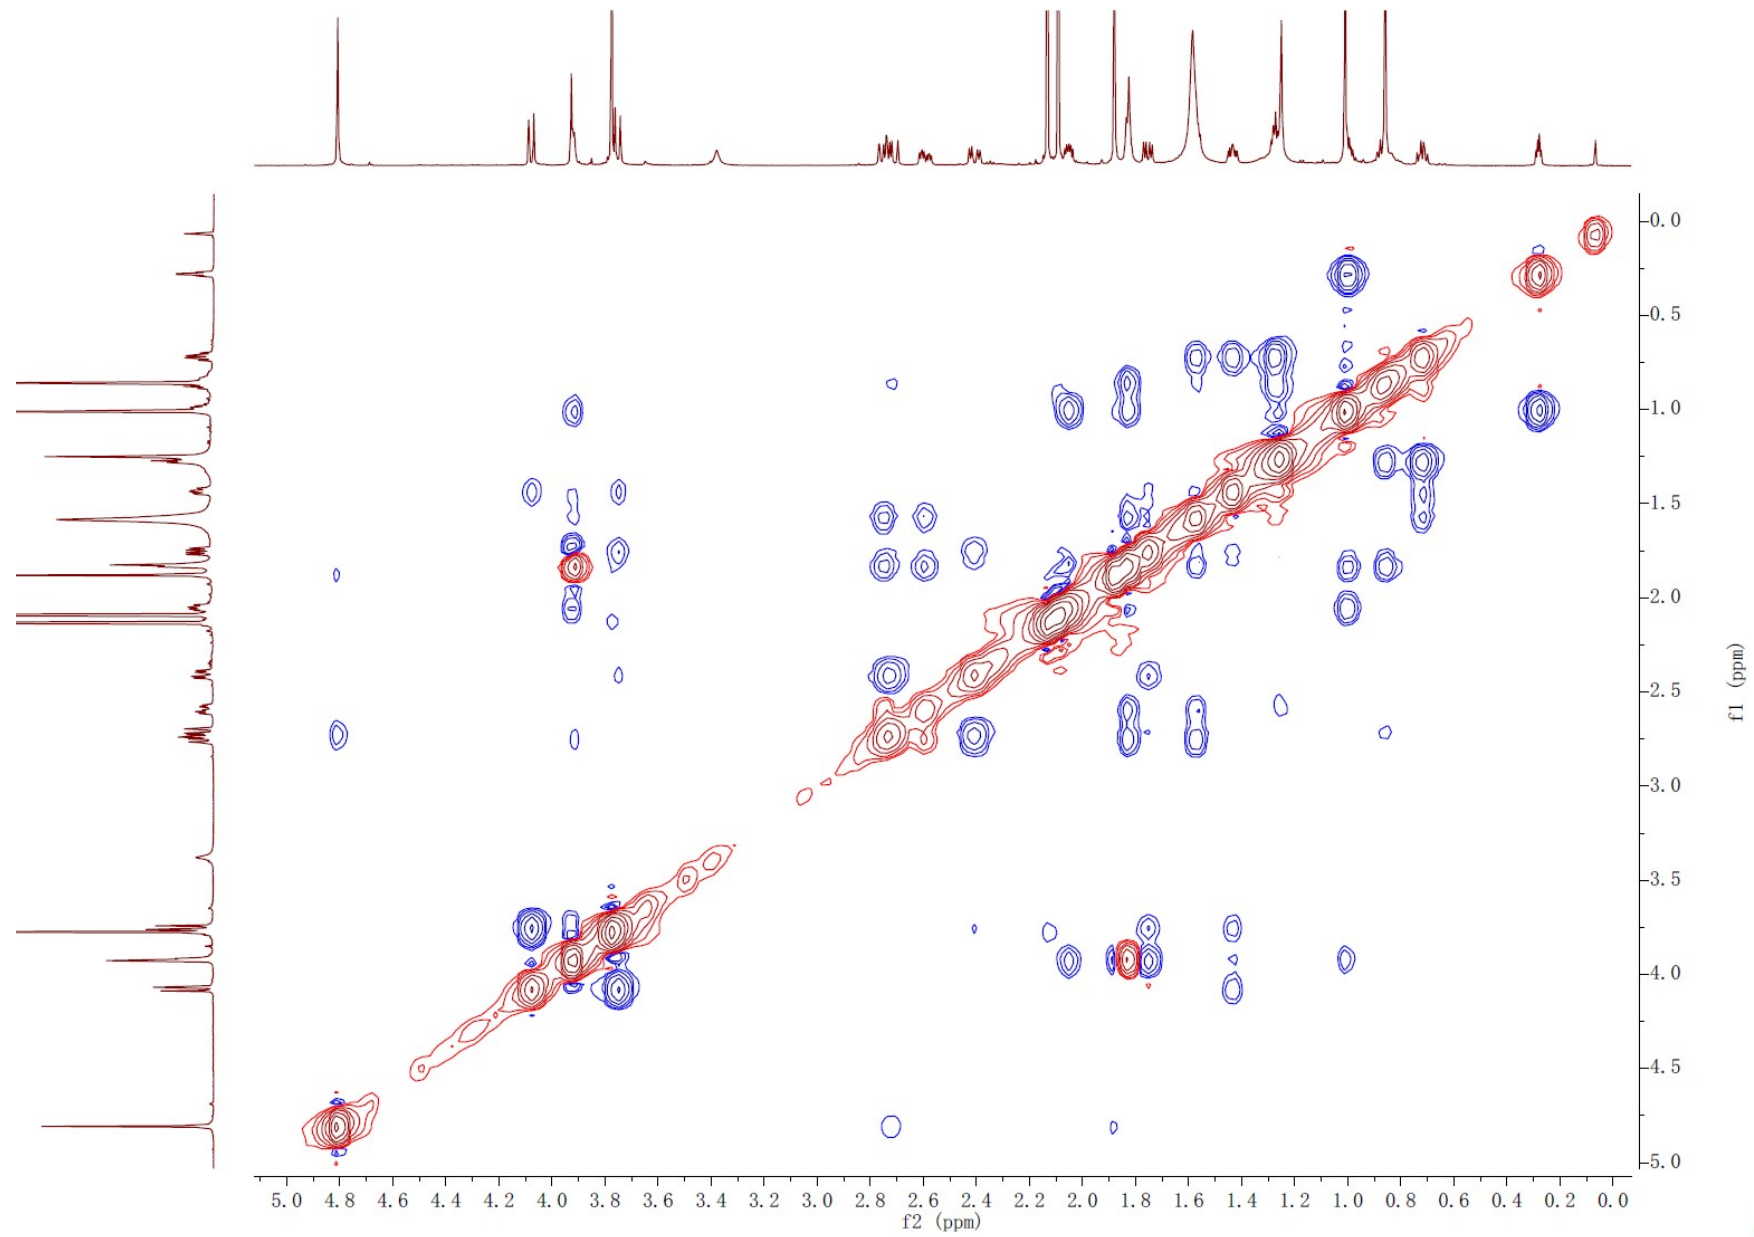

**Fig. S24** ROESY spectrum of compound **3** in CDCl<sub>3</sub>.

## User Spectra

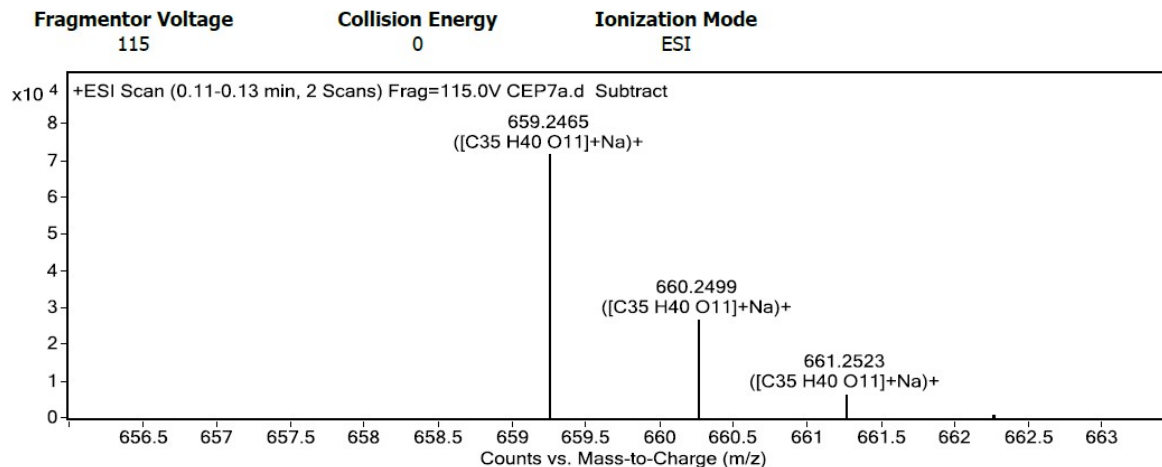

### Peak List

| m/z      | z | Abund    | Formula                                         | Ion                 |
|----------|---|----------|-------------------------------------------------|---------------------|
| 132.1018 |   | 7511.63  |                                                 |                     |
| 617.235  | 1 | 16261.72 |                                                 |                     |
| 618.2388 | 1 | 5566.16  |                                                 |                     |
| 631.2507 | 1 | 5749.18  |                                                 |                     |
| 633.2103 | 1 | 6642.71  |                                                 |                     |
| 659.2465 | 1 | 71883.18 | C <sub>35</sub> H <sub>40</sub> O <sub>11</sub> | (M+Na) <sup>+</sup> |
| 660.2499 | 1 | 26964.39 | C <sub>35</sub> H <sub>40</sub> O <sub>11</sub> | (M+Na) <sup>+</sup> |
| 661.2523 | 1 | 6738.39  | C <sub>35</sub> H <sub>40</sub> O <sub>11</sub> | (M+Na) <sup>+</sup> |
| 675.2205 | 1 | 23385.72 |                                                 |                     |
| 676.2236 | 1 | 8955.44  |                                                 |                     |

### Formula Calculator Element Limits

| Element | Min | Max |
|---------|-----|-----|
| C       | 3   | 60  |
| H       | 0   | 120 |
| O       | 0   | 30  |

### Formula Calculator Results

| Formula                                         | CalculatedMass | CalculatedMz | Mz       | Diff. (mDa) | Diff. (ppm) | DBE     |
|-------------------------------------------------|----------------|--------------|----------|-------------|-------------|---------|
| C <sub>35</sub> H <sub>40</sub> O <sub>11</sub> | 636.2571       | 659.2463     | 659.2465 | -0.20       | -0.30       | 16.0000 |

Fig. S25 HRESI (+) MS spectrum of compound 3.

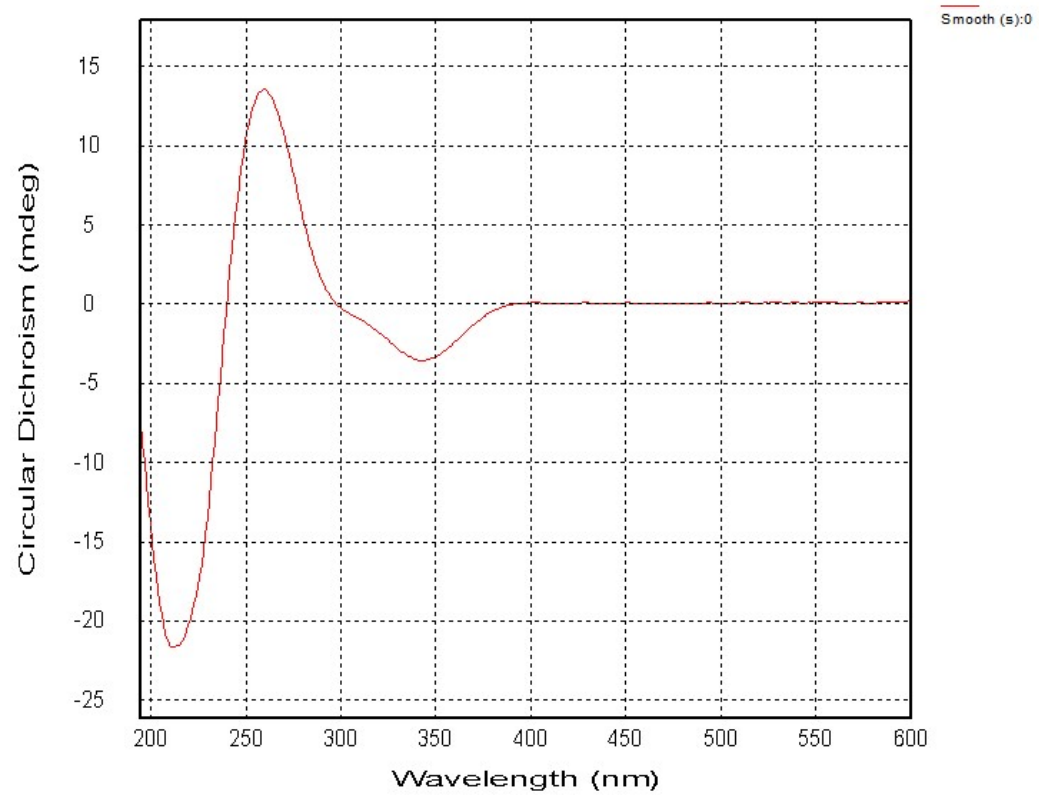

**Fig. S26** CD spectrum of compound **3**.

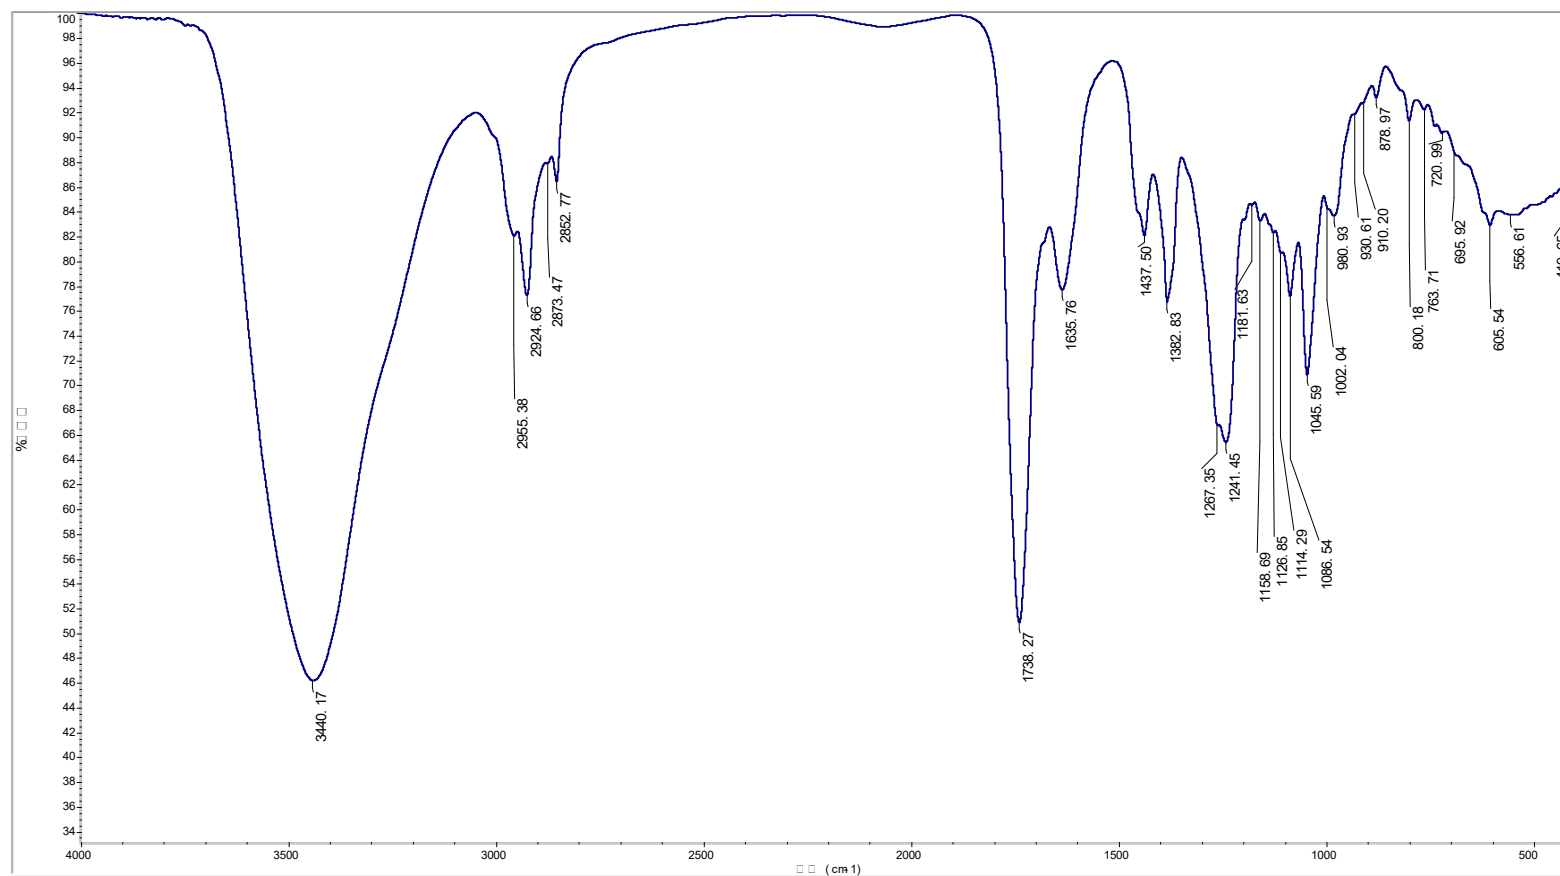

Sample Name: CEP-7a

KBr

9/8 19:53:58 2021 (GMT+08:00)

NI COLET i S10

Software version: OMNIC 9.8.372

16  
16  
4.000  
1.0  
0.4747  
80.00

Fig. S27 IR spectrum of compound 3.

**Table S1** Standard orientations of **1a** (1*R*,3*S*,4*S*,5*S*,9*R*,10*R*,11*R*,1'*R*,3'*S*,4'*S*,5'*R*,7'*R*,8'*R*,9'*S*,10'*S*,1'''*S*)-**1** at B3LYP/6-311+G(2d,p) level in methanol.

Conformation **1a-1**

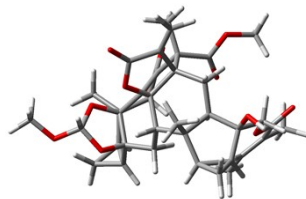

SCF Energy (B3LYP): -2377.125183 Hartree

| Center Number | Atomic Number | Atomic Type | Coordinates (Angstroms) |           |           |
|---------------|---------------|-------------|-------------------------|-----------|-----------|
|               |               |             | X                       | Y         | Z         |
| 1             | 6             | 0           | -2.551141               | 2.340013  | 0.337409  |
| 2             | 6             | 0           | -2.491608               | 0.816507  | -0.077633 |
| 3             | 6             | 0           | -1.446864               | 0.006434  | 0.650748  |
| 4             | 6             | 0           | -0.737642               | 0.421485  | 1.706274  |
| 5             | 6             | 0           | -0.834632               | 1.818746  | 2.154425  |
| 6             | 6             | 0           | -1.220435               | 2.777229  | 1.042264  |
| 7             | 6             | 0           | -2.244616               | 0.737368  | -1.621132 |
| 8             | 6             | 0           | -0.898596               | 0.084301  | -1.960411 |
| 9             | 6             | 0           | -0.761925               | -1.345689 | -1.386548 |
| 10            | 6             | 0           | -1.036851               | -1.369860 | 0.177921  |
| 11            | 6             | 0           | -2.600210               | 3.106452  | -0.993385 |
| 12            | 6             | 0           | -2.364952               | 2.159107  | -2.153747 |
| 13            | 6             | 0           | -3.701261               | 2.842137  | -1.978754 |
| 14            | 8             | 0           | -0.572390               | 2.233848  | 3.277959  |
| 15            | 8             | 0           | -1.295572               | 4.095771  | 1.529942  |
| 16            | 6             | 0           | 0.553097                | -2.093069 | -1.761728 |
| 17            | 1             | 0           | -1.597514               | -1.908415 | -1.812426 |
| 18            | 6             | 0           | 0.089043                | -1.843919 | 1.235966  |
| 19            | 6             | 0           | 1.472651                | -2.235227 | 0.609698  |
| 20            | 6             | 0           | 1.660341                | -1.626481 | -0.771769 |
| 21            | 6             | 0           | 0.190514                | -0.612810 | 2.298523  |
| 22            | 6             | 0           | -0.263161               | -0.955389 | 3.736980  |
| 23            | 8             | 0           | -2.169041               | -2.284758 | 0.373832  |
| 24            | 6             | 0           | -0.567103               | -3.062546 | 1.853009  |
| 25            | 6             | 0           | -1.953409               | -3.205207 | 1.344062  |
| 26            | 6             | 0           | -0.045849               | -3.979837 | 2.672417  |
| 27            | 8             | 0           | -2.804824               | -4.007228 | 1.662976  |
| 28            | 6             | 0           | 1.171685                | -1.717616 | -3.135455 |
| 29            | 6             | 0           | 2.668154                | -1.523100 | -2.959689 |
| 30            | 6             | 0           | 3.015865                | -1.823923 | -1.489206 |
| 31            | 6             | 0           | 2.144939                | -2.661350 | -3.798476 |
| 32            | 8             | 0           | 3.458588                | -3.171574 | -1.262567 |
| 33            | 6             | 0           | 0.248932                | -3.610114 | -1.696178 |
| 34            | 8             | 0           | -3.758647               | 0.168999  | 0.109707  |
| 35            | 1             | 0           | 1.564417                | -0.536063 | -0.690255 |

---

|    |   |   |           |           |           |
|----|---|---|-----------|-----------|-----------|
| 36 | 8 | 0 | -3.291117 | -0.140557 | -2.094813 |
| 37 | 6 | 0 | -4.221074 | -0.414643 | -1.095476 |
| 38 | 8 | 0 | -5.452422 | 0.119913  | -1.472902 |
| 39 | 1 | 0 | -4.317685 | -1.498449 | -0.947259 |
| 40 | 6 | 0 | 4.132108  | -0.921007 | -0.949452 |
| 41 | 8 | 0 | 3.777072  | 0.457672  | -1.155403 |
| 42 | 6 | 0 | 4.462783  | 1.378792  | -0.438722 |
| 43 | 8 | 0 | 5.345204  | 1.071309  | 0.348855  |
| 44 | 6 | 0 | 4.052826  | 2.786615  | -0.699575 |
| 45 | 6 | 0 | 3.158178  | 3.062277  | -1.668412 |
| 46 | 6 | 0 | 4.737185  | 3.794436  | 0.189640  |
| 47 | 6 | 0 | 2.634912  | 4.401894  | -2.084947 |
| 48 | 6 | 0 | -6.545866 | -0.339309 | -0.675072 |
| 49 | 6 | 0 | -3.736683 | 2.649112  | 1.264670  |
| 50 | 6 | 0 | 1.597751  | 0.013697  | 2.343027  |
| 51 | 8 | 0 | 1.943887  | 0.939253  | 1.631585  |
| 52 | 8 | 0 | 2.390267  | -0.551870 | 3.261437  |
| 53 | 6 | 0 | 3.704296  | 0.033286  | 3.425583  |
| 54 | 1 | 0 | -0.406565 | 2.714419  | 0.302003  |
| 55 | 1 | 0 | -0.828603 | 0.041700  | -3.049655 |
| 56 | 1 | 0 | -0.093422 | 0.747009  | -1.619914 |
| 57 | 1 | 0 | -2.148744 | 4.094772  | -0.991285 |
| 58 | 1 | 0 | -1.734527 | 2.436317  | -2.994066 |
| 59 | 1 | 0 | -3.929343 | 3.642174  | -2.677918 |
| 60 | 1 | 0 | -4.556881 | 2.236976  | -1.697901 |
| 61 | 1 | 0 | -1.077968 | 4.030313  | 2.481926  |
| 62 | 1 | 0 | 1.528991  | -3.321700 | 0.533058  |
| 63 | 1 | 0 | 2.280355  | -1.952726 | 1.288848  |
| 64 | 1 | 0 | 0.364026  | -1.729757 | 4.181237  |
| 65 | 1 | 0 | -0.198325 | -0.056031 | 4.354437  |
| 66 | 1 | 0 | -1.300167 | -1.300285 | 3.742843  |
| 67 | 1 | 0 | -0.655028 | -4.815042 | 3.005753  |
| 68 | 1 | 0 | 0.978415  | -3.931932 | 3.028961  |
| 69 | 1 | 0 | 0.623909  | -1.062766 | -3.803109 |
| 70 | 1 | 0 | 3.193076  | -0.705497 | -3.444824 |
| 71 | 1 | 0 | 2.255693  | -2.564422 | -4.875472 |
| 72 | 1 | 0 | 2.258747  | -3.675298 | -3.432179 |
| 73 | 1 | 0 | 4.140675  | -3.372662 | -1.924860 |
| 74 | 1 | 0 | -0.308692 | -3.885627 | -0.796800 |
| 75 | 1 | 0 | -0.367230 | -3.893719 | -2.556644 |
| 76 | 1 | 0 | 1.159217  | -4.212275 | -1.708403 |
| 77 | 1 | 0 | 4.292299  | -1.109909 | 0.113629  |
| 78 | 1 | 0 | 5.071184  | -1.128414 | -1.476432 |
| 79 | 1 | 0 | 2.757402  | 2.221659  | -2.229562 |
| 80 | 1 | 0 | 5.825868  | 3.734424  | 0.080408  |
| 81 | 1 | 0 | 4.425959  | 4.816221  | -0.033299 |
| 82 | 1 | 0 | 4.516073  | 3.591353  | 1.243986  |

---

|    |   |   |           |           |           |
|----|---|---|-----------|-----------|-----------|
| 83 | 1 | 0 | 1.541857  | 4.427496  | -1.980752 |
| 84 | 1 | 0 | 3.051750  | 5.233861  | -1.513761 |
| 85 | 1 | 0 | 2.845205  | 4.575080  | -3.148845 |
| 86 | 1 | 0 | -7.453544 | 0.042493  | -1.145300 |
| 87 | 1 | 0 | -6.583116 | -1.436824 | -0.652596 |
| 88 | 1 | 0 | -6.478788 | 0.039667  | 0.350977  |
| 89 | 1 | 0 | -3.693544 | 2.058629  | 2.187536  |
| 90 | 1 | 0 | -3.718552 | 3.707477  | 1.534315  |
| 91 | 1 | 0 | -4.682938 | 2.425344  | 0.770248  |
| 92 | 1 | 0 | 4.212015  | -0.604286 | 4.148021  |
| 93 | 1 | 0 | 4.241006  | 0.055747  | 2.475775  |
| 94 | 1 | 0 | 3.606696  | 1.049986  | 3.813596  |

Conformation **1a-2**

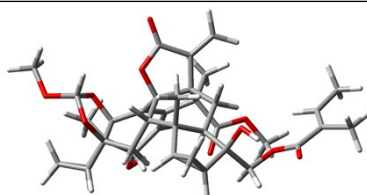

SCF Energy (B3LYP): -2377.124003 Hartree

| Center Number | Atomic Number | Atomic Type | Coordinates (Angstroms) |           |           |
|---------------|---------------|-------------|-------------------------|-----------|-----------|
|               |               |             | X                       | Y         | Z         |
| 1             | 6             | 0           | 0.970417                | 0.500948  | 0.937087  |
| 2             | 6             | 0           | 0.945512                | 1.801470  | 0.028656  |
| 3             | 6             | 0           | -0.380231               | -0.278967 | 1.346347  |
| 4             | 6             | 0           | 1.720657                | 1.573680  | -1.290676 |
| 5             | 6             | 0           | -0.486965               | 2.408558  | -0.107227 |
| 6             | 1             | 0           | 1.549667                | 2.522017  | 0.586660  |
| 7             | 6             | 0           | 1.840852                | -0.560401 | 0.299665  |
| 8             | 8             | 0           | 1.592865                | 0.909337  | 2.203424  |
| 9             | 6             | 0           | -1.711032               | 0.375972  | 0.846700  |
| 10            | 6             | 0           | -0.169421               | -1.792380 | 0.788209  |
| 11            | 6             | 0           | -0.318914               | -0.215761 | 2.861146  |
| 12            | 6             | 0           | 3.161119                | 1.098145  | -1.048152 |
| 13            | 1             | 0           | 1.783975                | 2.515815  | -1.839430 |
| 14            | 1             | 0           | 1.217709                | 0.856392  | -1.951052 |
| 15            | 6             | 0           | -0.769089               | 3.187328  | 1.200786  |
| 16            | 6             | 0           | -0.714590               | 3.306316  | -1.354425 |
| 17            | 6             | 0           | -1.489835               | 1.248964  | -0.378636 |
| 18            | 6             | 0           | 3.215885                | -0.238955 | -0.233095 |
| 19            | 6             | 0           | 1.214421                | -1.736432 | 0.179578  |
| 20            | 6             | 0           | 0.935791                | 0.447247  | 3.293306  |
| 21            | 1             | 0           | -2.132496               | 0.984325  | 1.648388  |
| 22            | 1             | 0           | -2.452657               | -0.402423 | 0.650959  |
| 23            | 6             | 0           | -0.246795               | -2.898785 | 1.861546  |
| 24            | 6             | 0           | -1.127045               | -2.119806 | -0.380984 |
| 25            | 6             | 0           | -1.242519               | -0.559370 | 3.763393  |



---

|    |   |   |           |           |           |
|----|---|---|-----------|-----------|-----------|
| 26 | 6 | 0 | 3.934817  | 0.852880  | -2.336909 |
| 27 | 8 | 0 | 3.801511  | 2.058689  | -0.177842 |
| 28 | 1 | 0 | -0.504692 | 2.608451  | 2.090729  |
| 29 | 1 | 0 | -0.162642 | 4.099927  | 1.218493  |
| 30 | 1 | 0 | -1.819756 | 3.466298  | 1.292708  |
| 31 | 6 | 0 | -1.840443 | 4.312281  | -1.376160 |
| 32 | 6 | 0 | -2.053077 | 2.947858  | -1.975729 |
| 33 | 1 | 0 | 0.124768  | 3.531306  | -2.001667 |
| 34 | 6 | 0 | -2.721585 | 1.883696  | -1.070580 |
| 35 | 1 | 0 | -1.029424 | 0.637301  | -1.164450 |
| 36 | 6 | 0 | 3.845515  | -1.353821 | -1.158666 |
| 37 | 8 | 0 | 4.068506  | 0.062628  | 0.880521  |
| 38 | 6 | 0 | 1.804691  | -2.810277 | -0.633833 |
| 39 | 8 | 0 | 1.355851  | 0.628039  | 4.416269  |
| 40 | 1 | 0 | -1.227755 | -2.927382 | 2.339476  |
| 41 | 1 | 0 | 0.510788  | -2.739067 | 2.631900  |
| 42 | 1 | 0 | -0.061290 | -3.867403 | 1.392760  |
| 43 | 8 | 0 | -2.184004 | -2.853383 | -0.014358 |
| 44 | 8 | 0 | -0.919857 | -1.777154 | -1.532268 |
| 45 | 1 | 0 | -1.044818 | -0.405321 | 4.820269  |
| 46 | 1 | 0 | -2.200832 | -0.989694 | 3.490899  |
| 47 | 6 | 0 | 5.399554  | 0.508177  | -2.194417 |
| 48 | 6 | 0 | 4.394299  | -0.591042 | -2.374351 |
| 49 | 1 | 0 | 3.595124  | 1.364559  | -3.233122 |
| 50 | 6 | 0 | 4.392007  | 1.441481  | 0.922091  |
| 51 | 1 | 0 | -2.375074 | 4.555804  | -0.465389 |
| 52 | 1 | 0 | -1.730894 | 5.143418  | -2.068379 |
| 53 | 1 | 0 | -2.169921 | 2.850923  | -3.052858 |
| 54 | 6 | 0 | -3.537389 | 0.905580  | -1.940201 |
| 55 | 8 | 0 | -3.566955 | 2.443783  | -0.061983 |
| 56 | 6 | 0 | 4.906551  | -2.190843 | -0.428102 |
| 57 | 6 | 0 | 2.733413  | -2.302230 | -1.720065 |
| 58 | 8 | 0 | 1.529757  | -4.003109 | -0.554237 |
| 59 | 6 | 0 | -3.053046 | -3.292539 | -1.086406 |
| 60 | 1 | 0 | 5.875934  | 0.666943  | -1.232634 |
| 61 | 1 | 0 | 6.032604  | 0.730535  | -3.049253 |
| 62 | 1 | 0 | 4.405502  | -1.138529 | -3.312796 |
| 63 | 8 | 0 | 5.770944  | 1.636108  | 0.855787  |
| 64 | 1 | 0 | 4.002647  | 1.866567  | 1.856730  |
| 65 | 8 | 0 | -4.382123 | 0.039031  | -1.148403 |
| 66 | 1 | 0 | -2.878946 | 0.235179  | -2.495303 |
| 67 | 1 | 0 | -4.169525 | 1.457339  | -2.639573 |
| 68 | 1 | 0 | -4.393156 | 2.724430  | -0.495202 |
| 69 | 1 | 0 | 5.288781  | -2.960138 | -1.102575 |
| 70 | 1 | 0 | 4.490778  | -2.686155 | 0.457396  |
| 71 | 1 | 0 | 5.735895  | -1.562113 | -0.100839 |
| 72 | 8 | 0 | 3.282413  | -3.376448 | -2.446049 |

---

|    |   |   |           |           |           |
|----|---|---|-----------|-----------|-----------|
| 73 | 1 | 0 | 2.088511  | -1.706668 | -2.387662 |
| 74 | 1 | 0 | -3.556324 | -2.435031 | -1.535829 |
| 75 | 1 | 0 | -2.471481 | -3.824103 | -1.841890 |
| 76 | 1 | 0 | -3.773299 | -3.959330 | -0.614296 |
| 77 | 6 | 0 | 6.456168  | 1.299238  | 2.064068  |
| 78 | 6 | 0 | -5.622881 | 0.500320  | -0.855966 |
| 79 | 1 | 0 | 2.867220  | -4.179056 | -2.070326 |
| 80 | 1 | 0 | 6.425834  | 0.220154  | 2.252481  |
| 81 | 1 | 0 | 6.021975  | 1.827968  | 2.923352  |
| 82 | 1 | 0 | 7.491720  | 1.616708  | 1.931355  |
| 83 | 6 | 0 | -6.449317 | -0.414082 | -0.023548 |
| 84 | 8 | 0 | -6.035796 | 1.581708  | -1.257576 |
| 85 | 6 | 0 | -7.900118 | -0.009840 | 0.069223  |
| 86 | 6 | 0 | -5.876488 | -1.455906 | 0.610181  |
| 87 | 1 | 0 | -8.351896 | 0.051576  | -0.927506 |
| 88 | 1 | 0 | -7.997060 | 0.984654  | 0.519104  |
| 89 | 1 | 0 | -8.482926 | -0.713802 | 0.665081  |
| 90 | 6 | 0 | -6.526757 | -2.450685 | 1.520075  |
| 91 | 1 | 0 | -4.809586 | -1.602288 | 0.466923  |
| 92 | 1 | 0 | -6.058723 | -2.414453 | 2.512912  |
| 93 | 1 | 0 | -6.363002 | -3.468368 | 1.141238  |
| 94 | 1 | 0 | -7.600954 | -2.299189 | 1.642376  |

**Table S2** Standard orientations of **2a** (1*R*,3*S*,4*S*,5*S*,9*R*,10*R*,11*R*,1'*R*,3'*S*,4'*S*,5'*R*,7'*R*,8'*R*,9'*S*,10'*S*)-**2** at B3LYP/6-311+G(2d,p) level in methanol.

Conformation **2a-1**

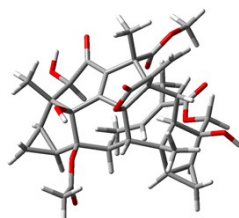

SCF Energy (B3LYP): -2375.954772 Hartree

| Center Number | Atomic Number | Atomic Type | Coordinates (Angstroms) |          |           |
|---------------|---------------|-------------|-------------------------|----------|-----------|
|               |               |             | X                       | Y        | Z         |
| 1             | 6             | 0           | -2.392451               | 2.608912 | 0.660272  |
| 2             | 6             | 0           | -2.543963               | 1.044391 | 0.460945  |
| 3             | 6             | 0           | -2.750587               | 3.206851 | -0.701195 |
| 4             | 6             | 0           | -2.822945               | 2.124525 | -1.755140 |
| 5             | 6             | 0           | -2.600028               | 0.771822 | -1.108258 |
| 6             | 6             | 0           | -1.393459               | 0.250668 | 1.043679  |
| 7             | 6             | 0           | -0.457023               | 0.723582 | 1.873797  |
| 8             | 6             | 0           | -0.344216               | 2.170468 | 2.101837  |
| 9             | 6             | 0           | -0.903624               | 2.998390 | 0.955619  |
| 10            | 6             | 0           | -3.274784               | 3.149159 | 1.798622  |
| 11            | 6             | 0           | -4.073158               | 2.858402 | -1.322319 |
| 12            | 8             | 0           | 0.195283                | 2.710151 | 3.061811  |

---

|    |   |   |           |           |           |
|----|---|---|-----------|-----------|-----------|
| 13 | 8 | 0 | -0.762651 | 4.373279  | 1.225716  |
| 14 | 6 | 0 | -1.171799 | -1.196050 | 0.684119  |
| 15 | 6 | 0 | -1.165727 | -1.341124 | -0.896798 |
| 16 | 6 | 0 | 0.016902  | -2.219308 | -1.404363 |
| 17 | 6 | 0 | 1.303346  | -1.771527 | -0.651777 |
| 18 | 6 | 0 | 1.296389  | -2.244796 | 0.794469  |
| 19 | 6 | 0 | 0.080968  | -1.655842 | 1.589498  |
| 20 | 6 | 0 | 0.423439  | -2.012444 | -2.887739 |
| 21 | 6 | 0 | 1.938836  | -1.943480 | -2.971023 |
| 22 | 6 | 0 | 2.501628  | -2.153328 | -1.551794 |
| 23 | 6 | 0 | 1.196274  | -3.091575 | -3.605918 |
| 24 | 6 | 0 | 3.761172  | -1.319577 | -1.286732 |
| 25 | 8 | 0 | 3.499123  | 0.060796  | -1.592264 |
| 26 | 6 | 0 | 4.397640  | 0.963975  | -1.135086 |
| 27 | 8 | 0 | 5.387887  | 0.635892  | -0.498241 |
| 28 | 6 | 0 | 4.080628  | 2.376867  | -1.482920 |
| 29 | 6 | 0 | 2.994301  | 2.664155  | -2.226033 |
| 30 | 6 | 0 | 5.070437  | 3.374590  | -0.935440 |
| 31 | 6 | 0 | 2.514710  | 4.009685  | -2.674701 |
| 32 | 8 | 0 | 2.866390  | -3.513167 | -1.266777 |
| 33 | 6 | 0 | -0.379364 | -3.694454 | -1.144633 |
| 34 | 1 | 0 | 1.304814  | -0.673853 | -0.663522 |
| 35 | 6 | 0 | 0.468328  | -0.324508 | 2.447223  |
| 36 | 6 | 0 | -1.325147 | 0.044686  | -1.572318 |
| 37 | 8 | 0 | -3.742568 | -0.130811 | -1.293239 |
| 38 | 8 | 0 | -3.740804 | 0.635584  | 1.116888  |
| 39 | 1 | 0 | -2.088109 | -1.886169 | -1.115072 |
| 40 | 8 | 0 | -2.322175 | -1.976399 | 1.162550  |
| 41 | 6 | 0 | -0.550191 | -2.727495 | 2.455192  |
| 42 | 6 | 0 | -2.010714 | -2.798074 | 2.197165  |
| 43 | 6 | 0 | 0.033757  | -3.589307 | 3.292583  |
| 44 | 8 | 0 | -2.851202 | -3.475317 | 2.747749  |
| 45 | 6 | 0 | 0.224173  | -0.440838 | 3.970076  |
| 46 | 6 | 0 | -4.207598 | -0.416733 | -2.534055 |
| 47 | 6 | 0 | -5.417988 | -1.313836 | -2.448830 |
| 48 | 8 | 0 | -3.709252 | -0.004445 | -3.560806 |
| 49 | 6 | 0 | 1.914275  | 0.141461  | 2.194258  |
| 50 | 8 | 0 | 2.225799  | 0.921589  | 1.313143  |
| 51 | 8 | 0 | 2.789596  | -0.386385 | 3.059429  |
| 52 | 6 | 0 | 4.158546  | 0.069933  | 2.948803  |
| 53 | 1 | 0 | -2.310630 | 4.171118  | -0.939356 |
| 54 | 1 | 0 | -2.440764 | 2.278383  | -2.757915 |
| 55 | 1 | 0 | -0.297275 | 2.745190  | 0.071658  |
| 56 | 1 | 0 | -3.045123 | 2.666788  | 2.755289  |
| 57 | 1 | 0 | -3.100045 | 4.222455  | 1.904397  |
| 58 | 1 | 0 | -4.331139 | 2.981823  | 1.586623  |
| 59 | 1 | 0 | -4.495231 | 3.567271  | -2.028645 |

---

|    |   |   |           |           |           |
|----|---|---|-----------|-----------|-----------|
| 60 | 1 | 0 | -4.807301 | 2.316791  | -0.732962 |
| 61 | 1 | 0 | -0.335670 | 4.419456  | 2.105257  |
| 62 | 1 | 0 | 1.238680  | -3.333753 | 0.815491  |
| 63 | 1 | 0 | 2.229027  | -1.997356 | 1.307017  |
| 64 | 1 | 0 | -0.175625 | -1.363017 | -3.515561 |
| 65 | 1 | 0 | 2.437135  | -1.218803 | -3.607916 |
| 66 | 1 | 0 | 1.134158  | -3.090675 | -4.691151 |
| 67 | 1 | 0 | 1.288886  | -4.079797 | -3.169689 |
| 68 | 1 | 0 | 4.584228  | -1.673949 | -1.918760 |
| 69 | 1 | 0 | 4.070213  | -1.418467 | -0.244243 |
| 70 | 1 | 0 | 2.376765  | 1.829289  | -2.547967 |
| 71 | 1 | 0 | 6.081805  | 3.158547  | -1.298152 |
| 72 | 1 | 0 | 4.817612  | 4.398527  | -1.215095 |
| 73 | 1 | 0 | 5.111894  | 3.318215  | 0.158476  |
| 74 | 1 | 0 | 3.153937  | 4.834293  | -2.352808 |
| 75 | 1 | 0 | 2.440988  | 4.038250  | -3.770024 |
| 76 | 1 | 0 | 1.500764  | 4.193278  | -2.294354 |
| 77 | 1 | 0 | 3.427151  | -3.826293 | -1.996117 |
| 78 | 1 | 0 | -1.143781 | -3.997166 | -1.868859 |
| 79 | 1 | 0 | 0.472116  | -4.370935 | -1.236577 |
| 80 | 1 | 0 | -0.804822 | -3.841310 | -0.147680 |
| 81 | 1 | 0 | -1.395367 | -0.077435 | -2.652695 |
| 82 | 1 | 0 | -0.462272 | 0.694383  | -1.381702 |
| 83 | 1 | 0 | -4.005370 | -0.213494 | 0.721959  |
| 84 | 1 | 0 | -0.569139 | -4.320760 | 3.822888  |
| 85 | 1 | 0 | 1.104363  | -3.596179 | 3.472245  |
| 86 | 1 | 0 | -0.823164 | -0.676560 | 4.174280  |
| 87 | 1 | 0 | 0.849862  | -1.212660 | 4.420993  |
| 88 | 1 | 0 | 0.457680  | 0.517244  | 4.442027  |
| 89 | 1 | 0 | -6.213202 | -0.816708 | -1.884073 |
| 90 | 1 | 0 | -5.769754 | -1.548302 | -3.453894 |
| 91 | 1 | 0 | -5.166294 | -2.237917 | -1.918671 |
| 92 | 1 | 0 | 4.535517  | -0.072020 | 1.934720  |
| 93 | 1 | 0 | 4.214215  | 1.128677  | 3.213068  |
| 94 | 1 | 0 | 4.718959  | -0.531869 | 3.662890  |

Conformation **2a-2**

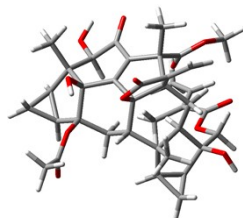

SCF Energy (B3LYP): -2375.954790 Hartree

| Center Number | Atomic Number | Atomic Type | Coordinates (Angstroms) |          |          |
|---------------|---------------|-------------|-------------------------|----------|----------|
|               |               |             | X                       | Y        | Z        |
| 1             | 6             | 0           | -2.272120               | 2.825870 | 0.357246 |

---

|    |   |   |           |           |           |
|----|---|---|-----------|-----------|-----------|
| 2  | 6 | 0 | -2.525664 | 1.263267  | 0.297775  |
| 3  | 6 | 0 | -2.574238 | 3.318763  | -1.058776 |
| 4  | 6 | 0 | -2.702509 | 2.151303  | -2.011817 |
| 5  | 6 | 0 | -2.580035 | 0.851414  | -1.241305 |
| 6  | 6 | 0 | -1.438681 | 0.452176  | 0.970877  |
| 7  | 6 | 0 | -0.476862 | 0.935193  | 1.765544  |
| 8  | 6 | 0 | -0.265323 | 2.385760  | 1.859863  |
| 9  | 6 | 0 | -0.763762 | 3.142411  | 0.638659  |
| 10 | 6 | 0 | -3.127795 | 3.523666  | 1.428196  |
| 11 | 6 | 0 | -3.908075 | 3.000147  | -1.671197 |
| 12 | 8 | 0 | 0.310641  | 2.972908  | 2.769614  |
| 13 | 8 | 0 | -0.535175 | 4.523855  | 0.787850  |
| 14 | 6 | 0 | -1.317326 | -1.033749 | 0.751714  |
| 15 | 6 | 0 | -1.300510 | -1.325866 | -0.808359 |
| 16 | 6 | 0 | -0.181199 | -2.333485 | -1.209505 |
| 17 | 6 | 0 | 1.126458  | -1.924075 | -0.470926 |
| 18 | 6 | 0 | 1.056869  | -2.255675 | 1.012715  |
| 19 | 6 | 0 | -0.114300 | -1.493607 | 1.721314  |
| 20 | 6 | 0 | 0.265168  | -2.292034 | -2.695554 |
| 21 | 6 | 0 | 1.781937  | -2.359589 | -2.748571 |
| 22 | 6 | 0 | 2.300391  | -2.490882 | -1.303314 |
| 23 | 6 | 0 | 0.952899  | -3.490925 | -3.301561 |
| 24 | 6 | 0 | 3.629722  | -1.759695 | -1.080721 |
| 25 | 8 | 0 | 3.515585  | -0.392971 | -1.515623 |
| 26 | 6 | 0 | 4.512514  | 0.443192  | -1.143368 |
| 27 | 8 | 0 | 5.463216  | 0.066544  | -0.473852 |
| 28 | 6 | 0 | 4.300716  | 1.827625  | -1.659169 |
| 29 | 6 | 0 | 5.274935  | 2.715163  | -1.381063 |
| 30 | 6 | 0 | 3.038903  | 2.112369  | -2.433881 |
| 31 | 6 | 0 | 5.349825  | 4.160405  | -1.758728 |
| 32 | 8 | 0 | 2.532548  | -3.847347 | -0.890302 |
| 33 | 6 | 0 | -0.698610 | -3.743838 | -0.829241 |
| 34 | 1 | 0 | 1.221565  | -0.836623 | -0.586194 |
| 35 | 6 | 0 | 0.370620  | -0.115642 | 2.445286  |
| 36 | 6 | 0 | -1.352980 | -0.001676 | -1.612470 |
| 37 | 8 | 0 | -3.779944 | 0.015128  | -1.365278 |
| 38 | 8 | 0 | -3.755558 | 0.996778  | 0.965345  |
| 39 | 1 | 0 | -2.257480 | -1.821369 | -0.992835 |
| 40 | 8 | 0 | -2.528376 | -1.681974 | 1.276019  |
| 41 | 6 | 0 | -0.837011 | -2.419310 | 2.679413  |
| 42 | 6 | 0 | -2.294530 | -2.412029 | 2.396355  |
| 43 | 6 | 0 | -0.332013 | -3.231284 | 3.612527  |
| 44 | 8 | 0 | -3.190850 | -2.967577 | 2.993068  |
| 45 | 6 | 0 | 0.123016  | -0.063750 | 3.971239  |
| 46 | 6 | 0 | -4.249482 | -0.348679 | -2.583658 |
| 47 | 6 | 0 | -5.524077 | -1.143790 | -2.440416 |
| 48 | 8 | 0 | -3.710427 | -0.068766 | -3.634270 |

---

---

|    |   |   |           |           |           |
|----|---|---|-----------|-----------|-----------|
| 49 | 6 | 0 | 1.846961  | 0.217762  | 2.155208  |
| 50 | 8 | 0 | 2.214727  | 0.875015  | 1.198532  |
| 51 | 8 | 0 | 2.681743  | -0.273056 | 3.079983  |
| 52 | 6 | 0 | 4.079498  | 0.073452  | 2.935125  |
| 53 | 1 | 0 | -2.069002 | 4.226994  | -1.374926 |
| 54 | 1 | 0 | -2.297276 | 2.188545  | -3.016626 |
| 55 | 1 | 0 | -0.169435 | 2.772967  | -0.212126 |
| 56 | 1 | 0 | -2.937873 | 3.117268  | 2.427975  |
| 57 | 1 | 0 | -2.885605 | 4.588940  | 1.438656  |
| 58 | 1 | 0 | -4.190787 | 3.404145  | 1.216845  |
| 59 | 1 | 0 | -4.273421 | 3.667084  | -2.446600 |
| 60 | 1 | 0 | -4.683788 | 2.562416  | -1.049691 |
| 61 | 1 | 0 | -0.102686 | 4.619436  | 1.660707  |
| 62 | 1 | 0 | 0.904718  | -3.328922 | 1.133762  |
| 63 | 1 | 0 | 1.998438  | -2.040126 | 1.523631  |
| 64 | 1 | 0 | -0.263591 | -1.649349 | -3.389869 |
| 65 | 1 | 0 | 2.350632  | -1.736538 | -3.432266 |
| 66 | 1 | 0 | 0.909007  | -3.578531 | -4.384154 |
| 67 | 1 | 0 | 0.951452  | -4.442099 | -2.781253 |
| 68 | 1 | 0 | 4.425596  | -2.248096 | -1.655338 |
| 69 | 1 | 0 | 3.909573  | -1.792217 | -0.025784 |
| 70 | 1 | 0 | 6.119197  | 2.338058  | -0.806588 |
| 71 | 1 | 0 | 2.153382  | 1.919195  | -1.817768 |
| 72 | 1 | 0 | 2.997348  | 3.149925  | -2.771082 |
| 73 | 1 | 0 | 2.959982  | 1.465249  | -3.314615 |
| 74 | 1 | 0 | 4.490964  | 4.509051  | -2.336292 |
| 75 | 1 | 0 | 5.432023  | 4.781740  | -0.856827 |
| 76 | 1 | 0 | 6.258782  | 4.350715  | -2.345013 |
| 77 | 1 | 0 | 3.069366  | -4.276153 | -1.577461 |
| 78 | 1 | 0 | -1.473965 | -4.049258 | -1.540628 |
| 79 | 1 | 0 | 0.096707  | -4.490907 | -0.841056 |
| 80 | 1 | 0 | -1.150003 | -3.765141 | 0.166974  |
| 81 | 1 | 0 | -1.418883 | -0.219851 | -2.677891 |
| 82 | 1 | 0 | -0.448974 | 0.602093  | -1.467507 |
| 83 | 1 | 0 | -4.064527 | 0.127521  | 0.655953  |
| 84 | 1 | 0 | -0.996319 | -3.858254 | 4.200175  |
| 85 | 1 | 0 | 0.732151  | -3.298987 | 3.816067  |
| 86 | 1 | 0 | -0.937961 | -0.200284 | 4.194287  |
| 87 | 1 | 0 | 0.691513  | -0.831858 | 4.497886  |
| 88 | 1 | 0 | 0.428905  | 0.915666  | 4.348295  |
| 89 | 1 | 0 | -6.290460 | -0.535253 | -1.949513 |
| 90 | 1 | 0 | -5.873856 | -1.453058 | -3.425761 |
| 91 | 1 | 0 | -5.352094 | -2.024617 | -1.813713 |
| 92 | 1 | 0 | 4.455730  | -0.226142 | 1.955535  |
| 93 | 1 | 0 | 4.205048  | 1.151581  | 3.059644  |
| 94 | 1 | 0 | 4.590902  | -0.465385 | 3.731569  |

---

Conformation 2a-3

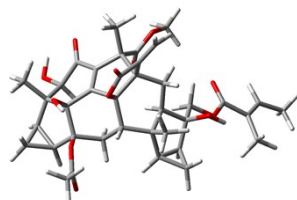

SCF Energy (B3LYP): -2375.951934 Hartree

| Center<br>Number | Atomic<br>Number | Atomic<br>Type | Coordinates (Angstroms) |           |           |
|------------------|------------------|----------------|-------------------------|-----------|-----------|
|                  |                  |                | X                       | Y         | Z         |
| 1                | 6                | 0              | 0.970417                | 0.500948  | 0.937087  |
| 2                | 6                | 0              | 0.945512                | 1.801470  | 0.028656  |
| 3                | 6                | 0              | -0.380231               | -0.278967 | 1.346347  |
| 4                | 6                | 0              | 1.720657                | 1.573680  | -1.290676 |
| 5                | 6                | 0              | -0.486965               | 2.408558  | -0.107227 |
| 6                | 1                | 0              | 1.549667                | 2.522017  | 0.586660  |
| 7                | 6                | 0              | 1.840852                | -0.560401 | 0.299665  |
| 8                | 8                | 0              | 1.592865                | 0.909337  | 2.203424  |
| 9                | 6                | 0              | -1.711032               | 0.375972  | 0.846700  |
| 10               | 6                | 0              | -0.169421               | -1.792380 | 0.788209  |
| 11               | 6                | 0              | -0.318914               | -0.215761 | 2.861146  |
| 12               | 6                | 0              | 3.161119                | 1.098145  | -1.048152 |
| 13               | 1                | 0              | 1.783975                | 2.515815  | -1.839430 |
| 14               | 1                | 0              | 1.217709                | 0.856392  | -1.951052 |
| 15               | 6                | 0              | -0.769089               | 3.187328  | 1.200786  |
| 16               | 6                | 0              | -0.714590               | 3.306316  | -1.354425 |
| 17               | 6                | 0              | -1.489835               | 1.248964  | -0.378636 |
| 18               | 6                | 0              | 3.215885                | -0.238955 | -0.233095 |
| 19               | 6                | 0              | 1.214421                | -1.736432 | 0.179578  |
| 20               | 6                | 0              | 0.935791                | 0.447247  | 3.293306  |
| 21               | 1                | 0              | -2.132496               | 0.984325  | 1.648388  |
| 22               | 1                | 0              | -2.452657               | -0.402423 | 0.650959  |
| 23               | 6                | 0              | -0.246795               | -2.898785 | 1.861546  |
| 24               | 6                | 0              | -1.127045               | -2.119806 | -0.380984 |
| 25               | 6                | 0              | -1.242519               | -0.559370 | 3.763393  |
| 26               | 6                | 0              | 3.934817                | 0.852880  | -2.336909 |
| 27               | 8                | 0              | 3.801511                | 2.058689  | -0.177842 |
| 28               | 1                | 0              | -0.504692               | 2.608451  | 2.090729  |
| 29               | 1                | 0              | -0.162642               | 4.099927  | 1.218493  |
| 30               | 1                | 0              | -1.819756               | 3.466298  | 1.292708  |
| 31               | 6                | 0              | -1.840443               | 4.312281  | -1.376160 |
| 32               | 6                | 0              | -2.053077               | 2.947858  | -1.975729 |
| 33               | 1                | 0              | 0.124768                | 3.531306  | -2.001667 |
| 34               | 6                | 0              | -2.721585               | 1.883696  | -1.070580 |
| 35               | 1                | 0              | -1.029424               | 0.637301  | -1.164450 |
| 36               | 6                | 0              | 3.845515                | -1.353821 | -1.158666 |
| 37               | 8                | 0              | 4.068506                | 0.062628  | 0.880521  |
| 38               | 6                | 0              | 1.804691                | -2.810277 | -0.633833 |

---

|    |   |   |           |           |           |
|----|---|---|-----------|-----------|-----------|
| 39 | 8 | 0 | 1.355851  | 0.628039  | 4.416269  |
| 40 | 1 | 0 | -1.227755 | -2.927382 | 2.339476  |
| 41 | 1 | 0 | 0.510788  | -2.739067 | 2.631900  |
| 42 | 1 | 0 | -0.061290 | -3.867403 | 1.392760  |
| 43 | 8 | 0 | -2.184004 | -2.853383 | -0.014358 |
| 44 | 8 | 0 | -0.919857 | -1.777154 | -1.532268 |
| 45 | 1 | 0 | -1.044818 | -0.405321 | 4.820269  |
| 46 | 1 | 0 | -2.200832 | -0.989694 | 3.490899  |
| 47 | 6 | 0 | 5.399554  | 0.508177  | -2.194417 |
| 48 | 6 | 0 | 4.394299  | -0.591042 | -2.374351 |
| 49 | 1 | 0 | 3.595124  | 1.364559  | -3.233122 |
| 50 | 6 | 0 | 4.392007  | 1.441481  | 0.922091  |
| 51 | 1 | 0 | -2.375074 | 4.555804  | -0.465389 |
| 52 | 1 | 0 | -1.730894 | 5.143418  | -2.068379 |
| 53 | 1 | 0 | -2.169921 | 2.850923  | -3.052858 |
| 54 | 6 | 0 | -3.537389 | 0.905580  | -1.940201 |
| 55 | 8 | 0 | -3.566955 | 2.443783  | -0.061983 |
| 56 | 6 | 0 | 4.906551  | -2.190843 | -0.428102 |
| 57 | 6 | 0 | 2.733413  | -2.302230 | -1.720065 |
| 58 | 8 | 0 | 1.529757  | -4.003109 | -0.554237 |
| 59 | 6 | 0 | -3.053046 | -3.292539 | -1.086406 |
| 60 | 1 | 0 | 5.875934  | 0.666943  | -1.232634 |
| 61 | 1 | 0 | 6.032604  | 0.730535  | -3.049253 |
| 62 | 1 | 0 | 4.405502  | -1.138529 | -3.312796 |
| 63 | 8 | 0 | 5.770944  | 1.636108  | 0.855787  |
| 64 | 1 | 0 | 4.002647  | 1.866567  | 1.856730  |
| 65 | 8 | 0 | -4.382123 | 0.039031  | -1.148403 |
| 66 | 1 | 0 | -2.878946 | 0.235179  | -2.495303 |
| 67 | 1 | 0 | -4.169525 | 1.457339  | -2.639573 |
| 68 | 1 | 0 | -4.393156 | 2.724430  | -0.495202 |
| 69 | 1 | 0 | 5.288781  | -2.960138 | -1.102575 |
| 70 | 1 | 0 | 4.490778  | -2.686155 | 0.457396  |
| 71 | 1 | 0 | 5.735895  | -1.562113 | -0.100839 |
| 72 | 8 | 0 | 3.282413  | -3.376448 | -2.446049 |
| 73 | 1 | 0 | 2.088511  | -1.706668 | -2.387662 |
| 74 | 1 | 0 | -3.556324 | -2.435031 | -1.535829 |
| 75 | 1 | 0 | -2.471481 | -3.824103 | -1.841890 |
| 76 | 1 | 0 | -3.773299 | -3.959330 | -0.614296 |
| 77 | 6 | 0 | 6.456168  | 1.299238  | 2.064068  |
| 78 | 6 | 0 | -5.622881 | 0.500320  | -0.855966 |
| 79 | 1 | 0 | 2.867220  | -4.179056 | -2.070326 |
| 80 | 1 | 0 | 6.425834  | 0.220154  | 2.252481  |
| 81 | 1 | 0 | 6.021975  | 1.827968  | 2.923352  |
| 82 | 1 | 0 | 7.491720  | 1.616708  | 1.931355  |
| 83 | 6 | 0 | -6.449317 | -0.414082 | -0.023548 |
| 84 | 8 | 0 | -6.035796 | 1.581708  | -1.257576 |
| 85 | 6 | 0 | -7.900118 | -0.009840 | 0.069223  |

---



|    |   |   |           |           |           |
|----|---|---|-----------|-----------|-----------|
| 86 | 6 | 0 | -5.876488 | -1.455906 | 0.610181  |
| 87 | 1 | 0 | -8.351896 | 0.051576  | -0.927506 |
| 88 | 1 | 0 | -7.997060 | 0.984654  | 0.519104  |
| 89 | 1 | 0 | -8.482926 | -0.713802 | 0.665081  |
| 90 | 6 | 0 | -6.526757 | -2.450685 | 1.520075  |
| 91 | 1 | 0 | -4.809586 | -1.602288 | 0.466923  |
| 92 | 1 | 0 | -6.058723 | -2.414453 | 2.512912  |
| 93 | 1 | 0 | -6.363002 | -3.468368 | 1.141238  |
| 94 | 1 | 0 | -7.600954 | -2.299189 | 1.642376  |

Conformation **2a-4**

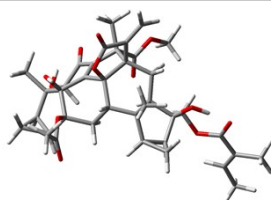

SCF Energy (B3LYP): -2375.952161 Hartree

| Center Number | Atomic Number | Atomic Type | Coordinates (Angstroms) |           |           |
|---------------|---------------|-------------|-------------------------|-----------|-----------|
|               |               |             | X                       | Y         | Z         |
| 1             | 6             | 0           | -3.708505               | 0.257392  | -2.123271 |
| 2             | 6             | 0           | -3.305102               | -0.228699 | -0.670760 |
| 3             | 6             | 0           | -3.759240               | -1.024207 | -2.956532 |
| 4             | 6             | 0           | -3.141663               | -2.176786 | -2.196396 |
| 5             | 6             | 0           | -2.745642               | -1.714096 | -0.808014 |
| 6             | 6             | 0           | -2.235332               | 0.626578  | -0.026361 |
| 7             | 6             | 0           | -1.814529               | 1.818341  | -0.465487 |
| 8             | 6             | 0           | -2.211519               | 2.291116  | -1.797727 |
| 9             | 6             | 0           | -2.591584               | 1.163071  | -2.744128 |
| 10            | 6             | 0           | -5.036057               | 1.034076  | -2.140363 |
| 11            | 6             | 0           | -4.625546               | -2.159819 | -2.491753 |
| 12            | 8             | 0           | -2.182080               | 3.453996  | -2.187009 |
| 13            | 8             | 0           | -2.969628               | 1.678583  | -3.998957 |
| 14            | 6             | 0           | -1.483181               | 0.159785  | 1.193319  |
| 15            | 6             | 0           | -0.890992               | -1.286612 | 0.911199  |
| 16            | 6             | 0           | 0.604710                | -1.412692 | 1.337689  |
| 17            | 6             | 0           | 1.352360                | -0.134962 | 0.854369  |
| 18            | 6             | 0           | 0.983885                | 1.078083  | 1.695930  |
| 19            | 6             | 0           | -0.543176               | 1.405731  | 1.594124  |
| 20            | 6             | 0           | 1.412442                | -2.534384 | 0.634558  |
| 21            | 6             | 0           | 2.763686                | -1.979934 | 0.219376  |
| 22            | 6             | 0           | 2.853124                | -0.519080 | 0.731000  |
| 23            | 6             | 0           | 2.681657                | -3.061481 | 1.261435  |
| 24            | 6             | 0           | 3.585655                | 0.389399  | -0.276491 |
| 25            | 8             | 0           | 4.751896                | -0.209114 | -0.904563 |
| 26            | 6             | 0           | 5.901758                | -0.296226 | -0.211678 |
| 27            | 8             | 0           | 5.974986                | -0.059829 | 0.992582  |
| 28            | 6             | 0           | 7.080638                | -0.711552 | -1.014628 |

---

|    |   |   |           |           |           |
|----|---|---|-----------|-----------|-----------|
| 29 | 6 | 0 | 6.957682  | -0.880568 | -2.346665 |
| 30 | 6 | 0 | 8.341918  | -0.895420 | -0.207894 |
| 31 | 6 | 0 | 8.014119  | -1.291683 | -3.322689 |
| 32 | 8 | 0 | 3.443241  | -0.390377 | 2.024831  |
| 33 | 6 | 0 | 0.615167  | -1.602473 | 2.874744  |
| 34 | 1 | 0 | 1.019106  | 0.035850  | -0.177284 |
| 35 | 6 | 0 | -0.870192 | 2.539029  | 0.468756  |
| 36 | 6 | 0 | -1.231668 | -1.744805 | -0.530368 |
| 37 | 8 | 0 | -3.426126 | -2.472132 | 0.248607  |
| 38 | 8 | 0 | -4.470075 | -0.169989 | 0.147165  |
| 39 | 1 | 0 | -1.467793 | -1.938804 | 1.572483  |
| 40 | 8 | 0 | -2.437666 | 0.001488  | 2.299848  |
| 41 | 6 | 0 | -1.094156 | 1.773000  | 2.957063  |
| 42 | 6 | 0 | -2.279881 | 0.936431  | 3.271320  |
| 43 | 6 | 0 | -0.614389 | 2.634347  | 3.858624  |
| 44 | 8 | 0 | -3.018122 | 0.988566  | 4.230693  |
| 45 | 6 | 0 | -1.560930 | 3.811004  | 1.011848  |
| 46 | 6 | 0 | -3.339337 | -3.823885 | 0.298855  |
| 47 | 6 | 0 | -4.169198 | -4.362456 | 1.438384  |
| 48 | 8 | 0 | -2.680317 | -4.494344 | -0.468492 |
| 49 | 6 | 0 | 0.381561  | 2.929216  | -0.338964 |
| 50 | 8 | 0 | 0.766028  | 2.325263  | -1.324589 |
| 51 | 8 | 0 | 0.998485  | 4.012154  | 0.149786  |
| 52 | 6 | 0 | 2.155019  | 4.477241  | -0.581631 |
| 53 | 1 | 0 | -3.581948 | -0.917803 | -4.022982 |
| 54 | 1 | 0 | -2.513845 | -2.911849 | -2.687019 |
| 55 | 1 | 0 | -1.682372 | 0.553321  | -2.868302 |
| 56 | 1 | 0 | -5.000009 | 1.914941  | -1.489544 |
| 57 | 1 | 0 | -5.239016 | 1.368653  | -3.160378 |
| 58 | 1 | 0 | -5.860409 | 0.404871  | -1.803519 |
| 59 | 1 | 0 | -4.983820 | -2.855062 | -3.245284 |
| 60 | 1 | 0 | -5.310685 | -1.997267 | -1.664848 |
| 61 | 1 | 0 | -2.868050 | 2.648760  | -3.919094 |
| 62 | 1 | 0 | 1.237892  | 0.879721  | 2.737470  |
| 63 | 1 | 0 | 1.570502  | 1.959093  | 1.423231  |
| 64 | 1 | 0 | 0.895443  | -3.220501 | -0.026288 |
| 65 | 1 | 0 | 3.194353  | -2.208679 | -0.750580 |
| 66 | 1 | 0 | 2.988035  | -4.061195 | 0.963272  |
| 67 | 1 | 0 | 2.937847  | -2.799864 | 2.281511  |
| 68 | 1 | 0 | 3.891810  | 1.316733  | 0.216225  |
| 69 | 1 | 0 | 2.942985  | 0.626534  | -1.124724 |
| 70 | 1 | 0 | 5.978067  | -0.700395 | -2.782089 |
| 71 | 1 | 0 | 8.196400  | -1.646880 | 0.576493  |
| 72 | 1 | 0 | 9.181575  | -1.208931 | -0.829956 |
| 73 | 1 | 0 | 8.618816  | 0.036420  | 0.298025  |
| 74 | 1 | 0 | 8.989178  | -1.473429 | -2.866571 |
| 75 | 1 | 0 | 7.703022  | -2.204252 | -3.848436 |

---

|    |   |   |           |           |           |
|----|---|---|-----------|-----------|-----------|
| 76 | 1 | 0 | 8.132311  | -0.519480 | -4.094532 |
| 77 | 1 | 0 | 4.412619  | -0.349953 | 1.886488  |
| 78 | 1 | 0 | 0.272136  | -2.614717 | 3.116295  |
| 79 | 1 | 0 | 1.611509  | -1.463478 | 3.297520  |
| 80 | 1 | 0 | -0.057391 | -0.904976 | 3.383539  |
| 81 | 1 | 0 | -0.895778 | -2.770466 | -0.679193 |
| 82 | 1 | 0 | -0.723920 | -1.132217 | -1.285239 |
| 83 | 1 | 0 | -4.312229 | -0.755728 | 0.908056  |
| 84 | 1 | 0 | -1.121077 | 2.757400  | 4.811451  |
| 85 | 1 | 0 | 0.277034  | 3.228623  | 3.683876  |
| 86 | 1 | 0 | -2.499996 | 3.555106  | 1.508430  |
| 87 | 1 | 0 | -0.925970 | 4.343582  | 1.721624  |
| 88 | 1 | 0 | -1.785529 | 4.479138  | 0.176403  |
| 89 | 1 | 0 | -5.216531 | -4.071085 | 1.310211  |
| 90 | 1 | 0 | -4.088089 | -5.449420 | 1.466822  |
| 91 | 1 | 0 | -3.824010 | -3.940310 | 2.387698  |
| 92 | 1 | 0 | 2.938846  | 3.717309  | -0.577414 |
| 93 | 1 | 0 | 1.876802  | 4.712214  | -1.610978 |
| 94 | 1 | 0 | 2.485818  | 5.372246  | -0.056861 |

Conformation **2a-5**

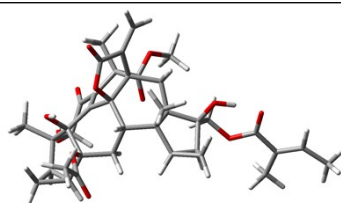

SCF Energy (B3LYP): -2375.952497 Hartree

| Center Number | Atomic Number | Atomic Type | Coordinates (Angstroms) |           |           |
|---------------|---------------|-------------|-------------------------|-----------|-----------|
|               |               |             | X                       | Y         | Z         |
| 1             | 6             | 0           | -3.784374               | 0.281072  | -2.052236 |
| 2             | 6             | 0           | -3.339340               | -0.240675 | -0.624367 |
| 3             | 6             | 0           | -3.841380               | -0.977109 | -2.920018 |
| 4             | 6             | 0           | -3.192418               | -2.143219 | -2.208265 |
| 5             | 6             | 0           | -2.766830               | -1.714894 | -0.817609 |
| 6             | 6             | 0           | -2.263352               | 0.608955  | 0.017224  |
| 7             | 6             | 0           | -1.867568               | 1.817625  | -0.398298 |
| 8             | 6             | 0           | -2.303850               | 2.323109  | -1.706071 |
| 9             | 6             | 0           | -2.694051               | 1.217642  | -2.674628 |
| 10            | 6             | 0           | -5.120768               | 1.041689  | -2.014439 |
| 11            | 6             | 0           | -4.683344               | -2.135251 | -2.466205 |
| 12            | 8             | 0           | -2.298979               | 3.496920  | -2.062129 |
| 13            | 8             | 0           | -3.109500               | 1.763653  | -3.904436 |
| 14            | 6             | 0           | -1.474996               | 0.117195  | 1.203792  |
| 15            | 6             | 0           | -0.873498               | -1.313241 | 0.865729  |
| 16            | 6             | 0           | 0.634358                | -1.432625 | 1.249483  |
| 17            | 6             | 0           | 1.353711                | -0.132413 | 0.783455  |
| 18            | 6             | 0           | 0.993596                | 1.051187  | 1.669548  |

---

|    |   |   |           |           |           |
|----|---|---|-----------|-----------|-----------|
| 19 | 6 | 0 | -0.539389 | 1.362836  | 1.616015  |
| 20 | 6 | 0 | 1.435932  | -2.523788 | 0.493430  |
| 21 | 6 | 0 | 2.768496  | -1.940912 | 0.057401  |
| 22 | 6 | 0 | 2.854974  | -0.493951 | 0.607582  |
| 23 | 6 | 0 | 2.727995  | -3.052080 | 1.070504  |
| 24 | 6 | 0 | 3.548129  | 0.453117  | -0.392935 |
| 25 | 8 | 0 | 4.700614  | -0.111987 | -1.075860 |
| 26 | 6 | 0 | 5.866761  | -0.230869 | -0.416254 |
| 27 | 8 | 0 | 5.976670  | -0.013658 | 0.788733  |
| 28 | 6 | 0 | 6.976087  | -0.651314 | -1.315688 |
| 29 | 6 | 0 | 8.173678  | -0.842416 | -0.727079 |
| 30 | 6 | 0 | 6.671057  | -0.825200 | -2.782815 |
| 31 | 6 | 0 | 9.461799  | -1.257850 | -1.361287 |
| 32 | 8 | 0 | 3.479396  | -0.394265 | 1.887878  |
| 33 | 6 | 0 | 0.687801  | -1.665678 | 2.779617  |
| 34 | 1 | 0 | 0.990530  | 0.063507  | -0.233459 |
| 35 | 6 | 0 | -0.907794 | 2.523021  | 0.531796  |
| 36 | 6 | 0 | -1.246016 | -1.734924 | -0.579029 |
| 37 | 8 | 0 | -3.411854 | -2.510392 | 0.233528  |
| 38 | 8 | 0 | -4.484056 | -0.218753 | 0.223442  |
| 39 | 1 | 0 | -1.425039 | -1.990847 | 1.523025  |
| 40 | 8 | 0 | -2.398794 | -0.083859 | 2.329206  |
| 41 | 6 | 0 | -1.059038 | 1.684581  | 3.002567  |
| 42 | 6 | 0 | -2.225613 | 0.823851  | 3.323536  |
| 43 | 6 | 0 | -0.566645 | 2.526467  | 3.915649  |
| 44 | 8 | 0 | -2.938060 | 0.838335  | 4.303506  |
| 45 | 6 | 0 | -1.598083 | 3.771477  | 1.127474  |
| 46 | 6 | 0 | -3.308519 | -3.861923 | 0.243359  |
| 47 | 6 | 0 | -4.104019 | -4.442204 | 1.386905  |
| 48 | 8 | 0 | -2.660546 | -4.502515 | -0.558125 |
| 49 | 6 | 0 | 0.318396  | 2.950435  | -0.296018 |
| 50 | 8 | 0 | 0.682103  | 2.380791  | -1.309566 |
| 51 | 8 | 0 | 0.938067  | 4.023840  | 0.209726  |
| 52 | 6 | 0 | 2.073169  | 4.519884  | -0.534915 |
| 53 | 1 | 0 | -3.691975 | -0.838654 | -3.987072 |
| 54 | 1 | 0 | -2.569106 | -2.857000 | -2.734765 |
| 55 | 1 | 0 | -1.781156 | 0.623054  | -2.838799 |
| 56 | 1 | 0 | -5.077900 | 1.905103  | -1.341068 |
| 57 | 1 | 0 | -5.353787 | 1.401093  | -3.019485 |
| 58 | 1 | 0 | -5.928836 | 0.393646  | -1.673884 |
| 59 | 1 | 0 | -5.052820 | -2.813309 | -3.229913 |
| 60 | 1 | 0 | -5.349312 | -2.003716 | -1.618374 |
| 61 | 1 | 0 | -3.019524 | 2.732486  | -3.798711 |
| 62 | 1 | 0 | 1.276558  | 0.825705  | 2.698086  |
| 63 | 1 | 0 | 1.562315  | 1.947284  | 1.408392  |
| 64 | 1 | 0 | 0.909522  | -3.197681 | -0.172550 |
| 65 | 1 | 0 | 3.173892  | -2.137482 | -0.930384 |

---

|    |   |   |           |           |           |
|----|---|---|-----------|-----------|-----------|
| 66 | 1 | 0 | 3.038045  | -4.039120 | 0.736163  |
| 67 | 1 | 0 | 3.008776  | -2.815797 | 2.090332  |
| 68 | 1 | 0 | 3.862164  | 1.366465  | 0.120334  |
| 69 | 1 | 0 | 2.878112  | 0.711474  | -1.213255 |
| 70 | 1 | 0 | 8.216113  | -0.673839 | 0.347311  |
| 71 | 1 | 0 | 6.289179  | 0.104708  | -3.218823 |
| 72 | 1 | 0 | 7.557793  | -1.123909 | -3.344870 |
| 73 | 1 | 0 | 5.898737  | -1.587116 | -2.937516 |
| 74 | 1 | 0 | 9.391252  | -1.417404 | -2.439189 |
| 75 | 1 | 0 | 10.233622 | -0.499347 | -1.174254 |
| 76 | 1 | 0 | 9.825921  | -2.184720 | -0.898269 |
| 77 | 1 | 0 | 4.444363  | -0.346036 | 1.724458  |
| 78 | 1 | 0 | 0.364051  | -2.688818 | 3.001033  |
| 79 | 1 | 0 | 1.693239  | -1.525418 | 3.179808  |
| 80 | 1 | 0 | 0.020268  | -0.991828 | 3.325633  |
| 81 | 1 | 0 | -0.902263 | -2.751775 | -0.765382 |
| 82 | 1 | 0 | -0.764979 | -1.095065 | -1.328740 |
| 83 | 1 | 0 | -4.301627 | -0.825376 | 0.962159  |
| 84 | 1 | 0 | -1.049697 | 2.615615  | 4.884396  |
| 85 | 1 | 0 | 0.312288  | 3.137392  | 3.735083  |
| 86 | 1 | 0 | -2.523449 | 3.491948  | 1.636890  |
| 87 | 1 | 0 | -0.952211 | 4.289237  | 1.838332  |
| 88 | 1 | 0 | -1.847800 | 4.461480  | 0.317315  |
| 89 | 1 | 0 | -5.156156 | -4.154085 | 1.296780  |
| 90 | 1 | 0 | -4.015291 | -5.528917 | 1.378519  |
| 91 | 1 | 0 | -3.735329 | -4.048090 | 2.339478  |
| 92 | 1 | 0 | 2.860757  | 3.764867  | -0.575013 |
| 93 | 1 | 0 | 1.767798  | 4.786322  | -1.548772 |
| 94 | 1 | 0 | 2.412160  | 5.399446  | 0.010318  |

**Table S3** Standard orientations of **3a** (1*R*,3*S*,6*R*,9*R*,10*S*,1'*R*,3'*S*,4'*S*,5'*R*,8'*S*,9'*S*,10'*S*)-**3** at B3LYP/6-311+G(2d,p) level in methanol.

| Conformation <b>3a-1</b>                                                            |               |             |                         |           |           |
|-------------------------------------------------------------------------------------|---------------|-------------|-------------------------|-----------|-----------|
| 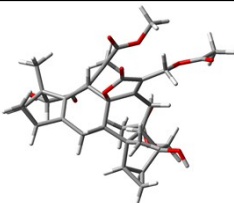 |               |             |                         |           |           |
| SCF Energy (B3LYP): --2184.099955 Hartree                                           |               |             |                         |           |           |
| Center Number                                                                       | Atomic Number | Atomic Type | Coordinates (Angstroms) |           |           |
|                                                                                     |               |             | X                       | Y         | Z         |
| 1                                                                                   | 6             | 0           | 0.400758                | 1.689439  | -1.953918 |
| 2                                                                                   | 6             | 0           | 1.178362                | 1.740659  | -0.586360 |
| 3                                                                                   | 6             | 0           | 1.836424                | 0.423031  | -0.137966 |
| 4                                                                                   | 6             | 0           | 1.065029                | -0.725085 | -0.734415 |
| 5                                                                                   | 6             | 0           | -0.416309               | -0.621180 | -1.107496 |
| 6                                                                                   | 6             | 0           | -0.822273               | 0.796034  | -1.636377 |

---

|    |   |   |           |           |           |
|----|---|---|-----------|-----------|-----------|
| 7  | 6 | 0 | 0.027907  | 3.187379  | -2.106119 |
| 8  | 6 | 0 | 0.996058  | 4.015665  | -1.272827 |
| 9  | 6 | 0 | 1.991423  | 3.048800  | -0.596320 |
| 10 | 6 | 0 | 1.585004  | -1.823994 | -1.314379 |
| 11 | 6 | 0 | 0.561000  | -2.429833 | -2.183122 |
| 12 | 8 | 0 | -0.542660 | -1.634822 | -2.162707 |
| 13 | 8 | 0 | 0.637053  | -3.416374 | -2.888102 |
| 14 | 6 | 0 | -3.078059 | -0.086127 | -1.873870 |
| 15 | 6 | 0 | -2.865419 | -0.765399 | -0.728579 |
| 16 | 6 | 0 | -4.144570 | -0.938017 | 0.074119  |
| 17 | 6 | 0 | -5.235943 | -0.585334 | -0.946680 |
| 18 | 6 | 0 | -4.538911 | 0.015486  | -2.166712 |
| 19 | 6 | 0 | -1.535044 | -1.101590 | -0.097347 |
| 20 | 6 | 0 | -1.499499 | -0.581721 | 1.348643  |
| 21 | 6 | 0 | -2.611498 | 0.334545  | 1.761021  |
| 22 | 6 | 0 | -4.004705 | 0.224925  | 1.084029  |
| 23 | 6 | 0 | -5.274654 | -1.312574 | -2.260060 |
| 24 | 6 | 0 | -1.979452 | 0.617742  | -2.633650 |
| 25 | 1 | 0 | -1.289949 | 1.284612  | -0.771984 |
| 26 | 6 | 0 | 0.993660  | 4.132421  | -2.775873 |
| 27 | 1 | 0 | 0.387247  | 1.955175  | 0.143116  |
| 28 | 6 | 0 | 2.989445  | -2.328334 | -1.411648 |
| 29 | 6 | 0 | 1.188146  | 1.172983  | -3.178178 |
| 30 | 8 | 0 | -4.995485 | 0.175079  | 2.098490  |
| 31 | 8 | 0 | 3.201804  | 2.835151  | -1.335666 |
| 32 | 6 | 0 | -4.350930 | -2.296390 | 0.758752  |
| 33 | 6 | 0 | -0.676342 | -1.080186 | 2.314688  |
| 34 | 8 | 0 | -2.531245 | 1.143027  | 2.682052  |
| 35 | 6 | 0 | -0.595469 | -0.608898 | 3.748980  |
| 36 | 8 | 0 | 3.701026  | -2.067365 | -0.184762 |
| 37 | 1 | 0 | -1.421168 | -2.187464 | -0.046386 |
| 38 | 6 | 0 | 5.044545  | -2.249644 | -0.233686 |
| 39 | 8 | 0 | 5.625177  | -2.624900 | -1.231456 |
| 40 | 6 | 0 | 2.436265  | 3.530489  | 0.796895  |
| 41 | 8 | 0 | 1.317501  | 3.861467  | 1.648289  |
| 42 | 6 | 0 | 5.686226  | -1.944767 | 1.095375  |
| 43 | 6 | 0 | 1.054875  | 3.065159  | 2.709585  |
| 44 | 6 | 0 | -0.140330 | 3.552731  | 3.485607  |
| 45 | 8 | 0 | 1.697014  | 2.067583  | 2.985179  |
| 46 | 6 | 0 | 0.208689  | -2.275630 | 2.038060  |
| 47 | 8 | 0 | -0.119677 | -3.264922 | 1.408393  |
| 48 | 8 | 0 | 1.387854  | -2.155445 | 2.663843  |
| 49 | 6 | 0 | 2.253533  | -3.311836 | 2.616430  |
| 50 | 1 | 0 | 2.873472  | 0.356185  | -0.476899 |
| 51 | 1 | 0 | 1.859271  | 0.378487  | 0.957658  |
| 52 | 1 | 0 | -1.026966 | 3.450575  | -2.124144 |
| 53 | 1 | 0 | 0.643757  | 4.856457  | -0.682674 |

---

|    |   |   |           |           |           |
|----|---|---|-----------|-----------|-----------|
| 54 | 1 | 0 | -6.160294 | -0.157934 | -0.568921 |
| 55 | 1 | 0 | -4.928992 | 0.879017  | -2.698461 |
| 56 | 1 | 0 | -4.106643 | 1.157976  | 0.504435  |
| 57 | 1 | 0 | -6.228124 | -1.318894 | -2.782309 |
| 58 | 1 | 0 | -4.674170 | -2.208769 | -2.397280 |
| 59 | 1 | 0 | -2.342970 | 1.597279  | -2.969209 |
| 60 | 1 | 0 | -1.672674 | 0.068530  | -3.531514 |
| 61 | 1 | 0 | 0.578774  | 5.048223  | -3.189287 |
| 62 | 1 | 0 | 1.833363  | 3.736433  | -3.336732 |
| 63 | 1 | 0 | 2.983379  | -3.403917 | -1.613511 |
| 64 | 1 | 0 | 3.522759  | -1.846901 | -2.239601 |
| 65 | 1 | 0 | 2.176542  | 1.630236  | -3.243175 |
| 66 | 1 | 0 | 1.330559  | 0.091608  | -3.158989 |
| 67 | 1 | 0 | 0.636976  | 1.412816  | -4.094480 |
| 68 | 1 | 0 | -4.726714 | 0.841257  | 2.757330  |
| 69 | 1 | 0 | 3.566423  | 3.706160  | -1.565735 |
| 70 | 1 | 0 | -4.434095 | -3.089577 | 0.008875  |
| 71 | 1 | 0 | -3.520739 | -2.550443 | 1.427435  |
| 72 | 1 | 0 | -5.266894 | -2.286568 | 1.356124  |
| 73 | 1 | 0 | 0.153298  | 0.189527  | 3.829623  |
| 74 | 1 | 0 | -1.542131 | -0.198817 | 4.098959  |
| 75 | 1 | 0 | -0.279664 | -1.424083 | 4.403787  |
| 76 | 1 | 0 | 3.055195  | 2.774534  | 1.280966  |
| 77 | 1 | 0 | 3.009614  | 4.456544  | 0.692906  |
| 78 | 1 | 0 | 6.766962  | -1.871940 | 0.968767  |
| 79 | 1 | 0 | 5.289681  | -1.016581 | 1.515123  |
| 80 | 1 | 0 | 5.464140  | -2.751991 | 1.802093  |
| 81 | 1 | 0 | -0.416585 | 4.571192  | 3.209079  |
| 82 | 1 | 0 | -0.980611 | 2.878673  | 3.283708  |
| 83 | 1 | 0 | 0.081033  | 3.498285  | 4.554831  |
| 84 | 1 | 0 | 3.106280  | -3.054920 | 3.243442  |
| 85 | 1 | 0 | 1.732465  | -4.185346 | 3.013750  |
| 86 | 1 | 0 | 2.573663  | -3.499146 | 1.591244  |

Conformation 3a-2

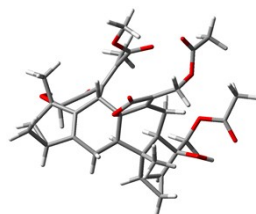

SCF Energy (B3LYP): -2184.095209 Hartree

| Center Number | Atomic Number | Atomic Type | Coordinates (Angstroms) |           |           |
|---------------|---------------|-------------|-------------------------|-----------|-----------|
|               |               |             | X                       | Y         | Z         |
| 1             | 6             | 0           | -0.509075               | -2.228322 | -1.278594 |
| 2             | 6             | 0           | -1.367828               | -1.680527 | -0.077126 |
| 3             | 6             | 0           | -1.704100               | -0.178872 | -0.130295 |

---

|    |   |   |           |           |           |
|----|---|---|-----------|-----------|-----------|
| 4  | 6 | 0 | -0.637893 | 0.526427  | -0.923903 |
| 5  | 6 | 0 | 0.793626  | 0.002214  | -1.033696 |
| 6  | 6 | 0 | 0.871028  | -1.561323 | -1.065462 |
| 7  | 6 | 0 | -0.502046 | -3.740332 | -0.934691 |
| 8  | 6 | 0 | -1.694093 | -4.043033 | -0.039398 |
| 9  | 6 | 0 | -2.484098 | -2.722223 | 0.167040  |
| 10 | 6 | 0 | -0.837955 | 1.461738  | -1.872926 |
| 11 | 6 | 0 | 0.359307  | 1.529844  | -2.728481 |
| 12 | 8 | 0 | 1.241188  | 0.581394  | -2.306370 |
| 13 | 8 | 0 | 0.572537  | 2.223827  | -3.702545 |
| 14 | 6 | 0 | 3.284418  | -1.306396 | -1.210651 |
| 15 | 6 | 0 | 3.166198  | -0.274303 | -0.350075 |
| 16 | 6 | 0 | 4.373882  | -0.163528 | 0.566858  |
| 17 | 6 | 0 | 5.412531  | -1.054657 | -0.128311 |
| 18 | 6 | 0 | 4.684433  | -1.824782 | -1.229121 |
| 19 | 6 | 0 | 1.918409  | 0.523925  | -0.048957 |
| 20 | 6 | 0 | 1.636501  | 0.508877  | 1.462184  |
| 21 | 6 | 0 | 2.456975  | -0.407705 | 2.313692  |
| 22 | 6 | 0 | 3.845235  | -0.894829 | 1.825035  |
| 23 | 6 | 0 | 5.752998  | -0.796668 | -1.567846 |
| 24 | 6 | 0 | 2.104794  | -1.955756 | -1.894034 |
| 25 | 1 | 0 | 1.141956  | -1.839597 | -0.038993 |
| 26 | 6 | 0 | -1.622015 | -4.627983 | -1.422218 |
| 27 | 1 | 0 | -0.707191 | -1.821105 | 0.788146  |
| 28 | 6 | 0 | -2.090186 | 2.167588  | -2.302478 |
| 29 | 6 | 0 | -1.062914 | -1.974230 | -2.697658 |
| 30 | 8 | 0 | 4.753624  | -0.826666 | 2.910097  |
| 31 | 8 | 0 | -3.528507 | -2.508182 | -0.783171 |
| 32 | 6 | 0 | 4.880634  | 1.251620  | 0.877721  |
| 33 | 6 | 0 | 0.863949  | 1.435632  | 2.094785  |
| 34 | 8 | 0 | 2.143588  | -0.738461 | 3.454477  |
| 35 | 6 | 0 | 0.511720  | 1.452035  | 3.567118  |
| 36 | 8 | 0 | -2.940314 | 2.526383  | -1.194901 |
| 37 | 1 | 0 | 2.079290  | 1.567375  | -0.338148 |
| 38 | 6 | 0 | -2.971478 | 3.829281  | -0.823326 |
| 39 | 8 | 0 | -2.331364 | 4.703490  | -1.373783 |
| 40 | 6 | 0 | -3.054205 | -2.714998 | 1.590872  |
| 41 | 8 | 0 | -3.778034 | -1.501408 | 1.902226  |
| 42 | 6 | 0 | -3.889454 | 4.028078  | 0.353567  |
| 43 | 6 | 0 | -5.095746 | -1.470497 | 1.616393  |
| 44 | 6 | 0 | -5.722386 | -0.180572 | 2.075367  |
| 45 | 8 | 0 | -5.689285 | -2.379459 | 1.060154  |
| 46 | 6 | 0 | 0.260332  | 2.618648  | 1.377324  |
| 47 | 8 | 0 | -0.922033 | 2.897917  | 1.439875  |
| 48 | 8 | 0 | 1.187247  | 3.376470  | 0.778680  |
| 49 | 6 | 0 | 0.728445  | 4.617894  | 0.188781  |
| 50 | 1 | 0 | -2.669883 | -0.003999 | -0.611541 |

---



---

|    |   |   |           |           |           |
|----|---|---|-----------|-----------|-----------|
| 51 | 1 | 0 | -1.785169 | 0.226836  | 0.884728  |
| 52 | 1 | 0 | 0.457227  | -4.210039 | -0.730420 |
| 53 | 1 | 0 | -1.593742 | -4.708765 | 0.815057  |
| 54 | 1 | 0 | 6.154417  | -1.545018 | 0.495174  |
| 55 | 1 | 0 | 4.872403  | -2.875329 | -1.432820 |
| 56 | 1 | 0 | 3.689947  | -1.947595 | 1.531088  |
| 57 | 1 | 0 | 6.713215  | -1.171598 | -1.913132 |
| 58 | 1 | 0 | 5.427284  | 0.126551  | -2.041372 |
| 59 | 1 | 0 | 2.236924  | -3.044989 | -1.881024 |
| 60 | 1 | 0 | 2.011625  | -1.659396 | -2.945261 |
| 61 | 1 | 0 | -1.408780 | -5.691706 | -1.493355 |
| 62 | 1 | 0 | -2.316938 | -4.261505 | -2.169475 |
| 63 | 1 | 0 | -1.832014 | 3.059299  | -2.875755 |
| 64 | 1 | 0 | -2.699092 | 1.510359  | -2.932956 |
| 65 | 1 | 0 | -2.122331 | -2.225488 | -2.766989 |
| 66 | 1 | 0 | -0.953313 | -0.935442 | -3.012185 |
| 67 | 1 | 0 | -0.516113 | -2.592723 | -3.418425 |
| 68 | 1 | 0 | 4.224911  | -1.056431 | 3.697753  |
| 69 | 1 | 0 | -4.351165 | -2.883769 | -0.419957 |
| 70 | 1 | 0 | 5.248315  | 1.731990  | -0.034674 |
| 71 | 1 | 0 | 4.093362  | 1.887312  | 1.298824  |
| 72 | 1 | 0 | 5.698656  | 1.211594  | 1.602533  |
| 73 | 1 | 0 | -0.165005 | 0.627729  | 3.813776  |
| 74 | 1 | 0 | 1.400590  | 1.316031  | 4.188818  |
| 75 | 1 | 0 | 0.019289  | 2.389467  | 3.832133  |
| 76 | 1 | 0 | -3.721451 | -3.569357 | 1.735148  |
| 77 | 1 | 0 | -2.250037 | -2.762231 | 2.327509  |
| 78 | 1 | 0 | -4.815405 | 3.461057  | 0.226658  |
| 79 | 1 | 0 | -3.383197 | 3.659800  | 1.251664  |
| 80 | 1 | 0 | -4.108125 | 5.090059  | 0.472800  |
| 81 | 1 | 0 | -5.551071 | -0.037600 | 3.146665  |
| 82 | 1 | 0 | -5.257107 | 0.661713  | 1.552511  |
| 83 | 1 | 0 | -6.792243 | -0.196577 | 1.866674  |
| 84 | 1 | 0 | 1.624705  | 5.086816  | -0.214408 |
| 85 | 1 | 0 | -0.000454 | 4.423055  | -0.598516 |
| 86 | 1 | 0 | 0.276862  | 5.247183  | 0.958884  |

---
